# Supplementary material for: Design, Synthesis and Antiproliferative Evaluation of Glucose 6ʺ-OH Modified Open-Chain Analogues of Ipomoeassin F
Source: Preprints.org preprint supplement (doi:10.20944/preprints202410.2501.v1), 2024-10-31

## **Supplementary Information 2:**

# **Design, Synthesis and Antiproliferative Evaluation of Glucose 6''-OH Modified Open-Chain Analogues of Ipomoeassin F**

Arman Khosravi, Precious Nnamdi, Alexa May, Kelsey Slattery, Robert E. Sammelson and Wei Q. Shi

## Table of Contents

| #  | Item                                      | Pg  |
|----|-------------------------------------------|-----|
| 1  | <sup>1</sup> H NMR spectrum of <b>15</b>  | S3  |
| 2  | <sup>13</sup> C NMR spectrum of <b>15</b> | S4  |
| 3  | COSY NMR spectrum of <b>15</b>            | S5  |
| 4  | HMQC NMR spectrum of <b>15</b>            | S6  |
| 5  | HMBC NMR spectrum of <b>15</b>            | S7  |
| 6  | <sup>1</sup> H NMR spectrum of <b>16</b>  | S8  |
| 7  | <sup>13</sup> C NMR spectrum of <b>16</b> | S9  |
| 8  | COSY NMR spectrum of <b>16</b>            | S10 |
| 9  | HMQC NMR spectrum of <b>16</b>            | S11 |
| 10 | HMBC NMR spectrum of <b>16</b>            | S12 |
| 11 | <sup>1</sup> H NMR spectrum of <b>17</b>  | S13 |
| 12 | <sup>13</sup> C NMR spectrum of <b>17</b> | S14 |
| 13 | COSY NMR spectrum of <b>17</b>            | S15 |
| 14 | HMQC NMR spectrum of <b>17</b>            | S16 |
| 15 | HMBC NMR spectrum of <b>17</b>            | S17 |
| 16 | <sup>1</sup> H NMR spectrum of <b>18</b>  | S18 |
| 17 | <sup>13</sup> C NMR spectrum of <b>18</b> | S19 |
| 18 | COSY NMR spectrum of <b>18</b>            | S20 |
| 19 | HMQC NMR spectrum of <b>18</b>            | S21 |
| 20 | HMBC NMR spectrum of <b>18</b>            | S22 |
| 21 | <sup>1</sup> H NMR spectrum of <b>21</b>  | S23 |
| 22 | <sup>13</sup> C NMR spectrum of <b>21</b> | S24 |
| 23 | DEPT 135 NMR spectrum of <b>21</b>        | S25 |
| 24 | COSY NMR spectrum of <b>21</b>            | S26 |
| 25 | HMQC NMR spectrum of <b>21</b>            | S27 |
| 26 | HMBC NMR spectrum of <b>21</b>            | S28 |

| #  | Item                                      | Pg  |
|----|-------------------------------------------|-----|
| 27 | <sup>1</sup> H NMR spectrum of <b>22</b>  | S29 |
| 28 | <sup>13</sup> C NMR spectrum of <b>22</b> | S30 |
| 29 | DEPT 135 NMR spectrum of <b>22</b>        | S31 |
| 30 | COSY NMR spectrum of <b>22</b>            | S32 |
| 31 | HMQC NMR spectrum of <b>22</b>            | S33 |
| 32 | HMBC NMR spectrum of <b>22</b>            | S34 |
| 33 | <sup>1</sup> H NMR spectrum of <b>23</b>  | S35 |
| 34 | <sup>13</sup> C NMR spectrum of <b>23</b> | S36 |
| 35 | DEPT 135 NMR spectrum of <b>23</b>        | S37 |
| 36 | COSY NMR spectrum of <b>23</b>            | S38 |
| 37 | HMQC NMR spectrum of <b>23</b>            | S39 |
| 38 | HMBC NMR spectrum of <b>23</b>            | S40 |
| 39 | <sup>1</sup> H NMR spectrum of <b>10</b>  | S41 |
| 40 | <sup>13</sup> C NMR spectrum of <b>10</b> | S42 |
| 41 | DEPT 135 NMR spectrum of <b>10</b>        | S43 |
| 42 | COSY NMR spectrum of <b>10</b>            | S44 |
| 43 | HMQC NMR spectrum of <b>10</b>            | S45 |
| 44 | HMBC NMR spectrum of <b>10</b>            | S46 |
| 45 | <sup>1</sup> H NMR spectrum of <b>11</b>  | S47 |
| 46 | <sup>13</sup> C NMR spectrum of <b>11</b> | S48 |
| 47 | DEPT 135 NMR spectrum of <b>11</b>        | S49 |
| 48 | COSY NMR spectrum of <b>11</b>            | S50 |
| 49 | HMQC NMR spectrum of <b>11</b>            | S51 |
| 50 | HMBC NMR spectrum of <b>11</b>            | S52 |
|    |                                           |     |
|    |                                           |     |

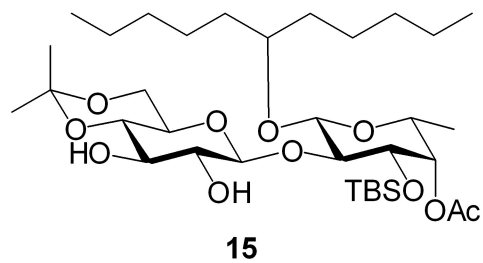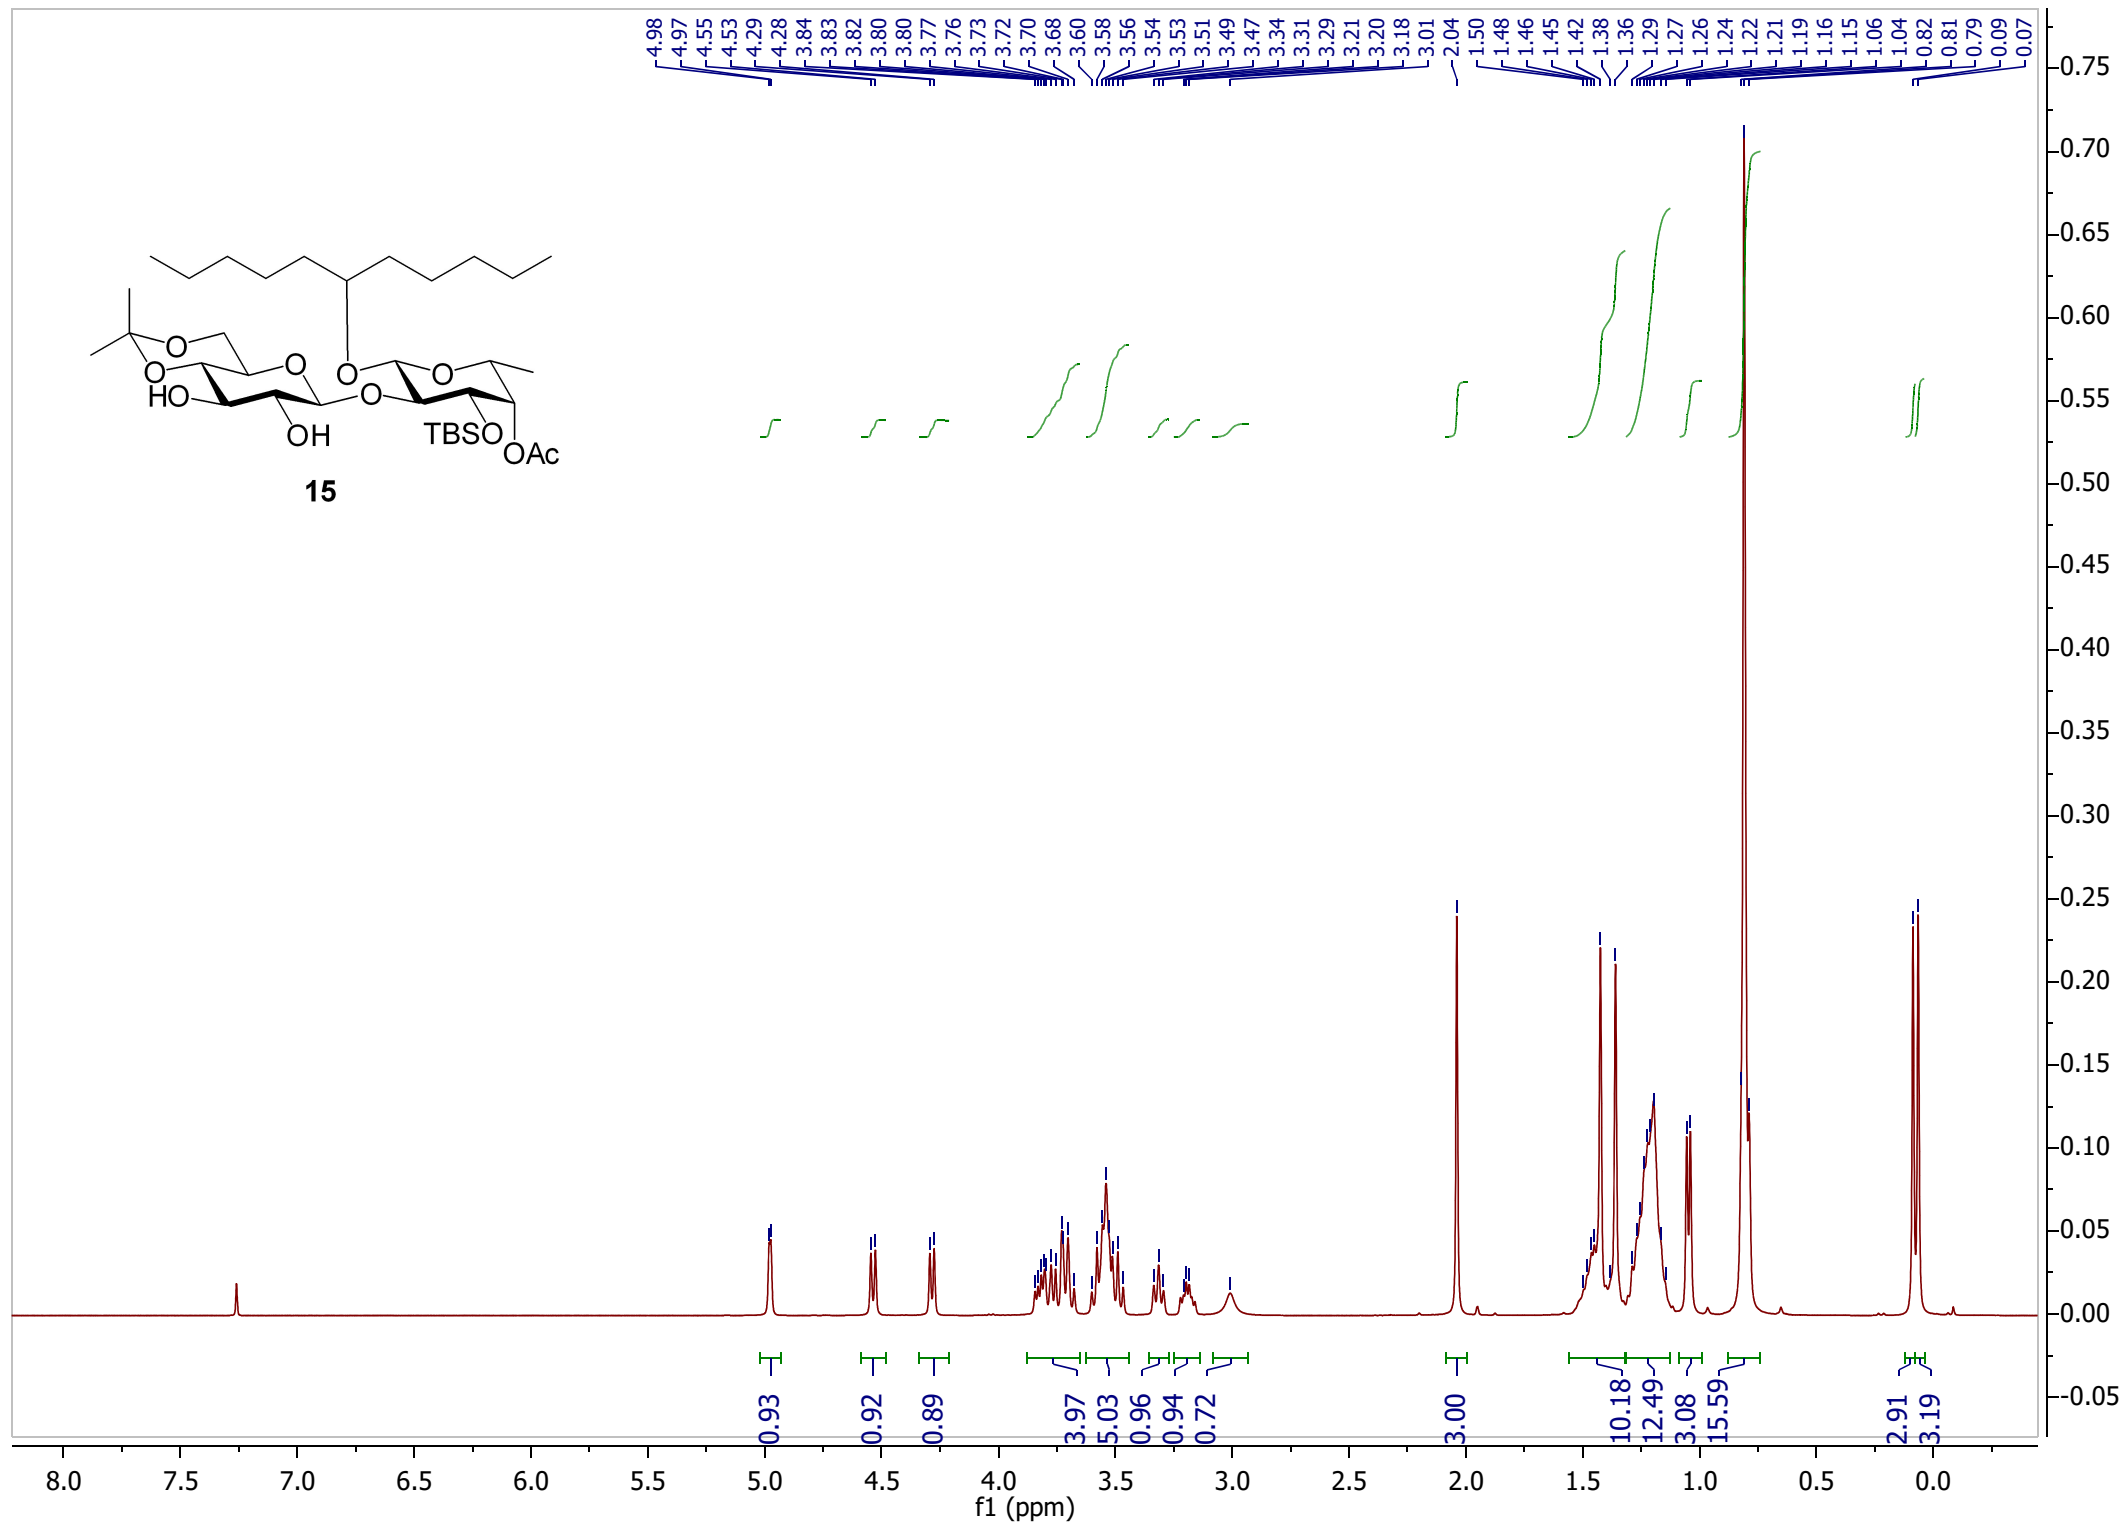

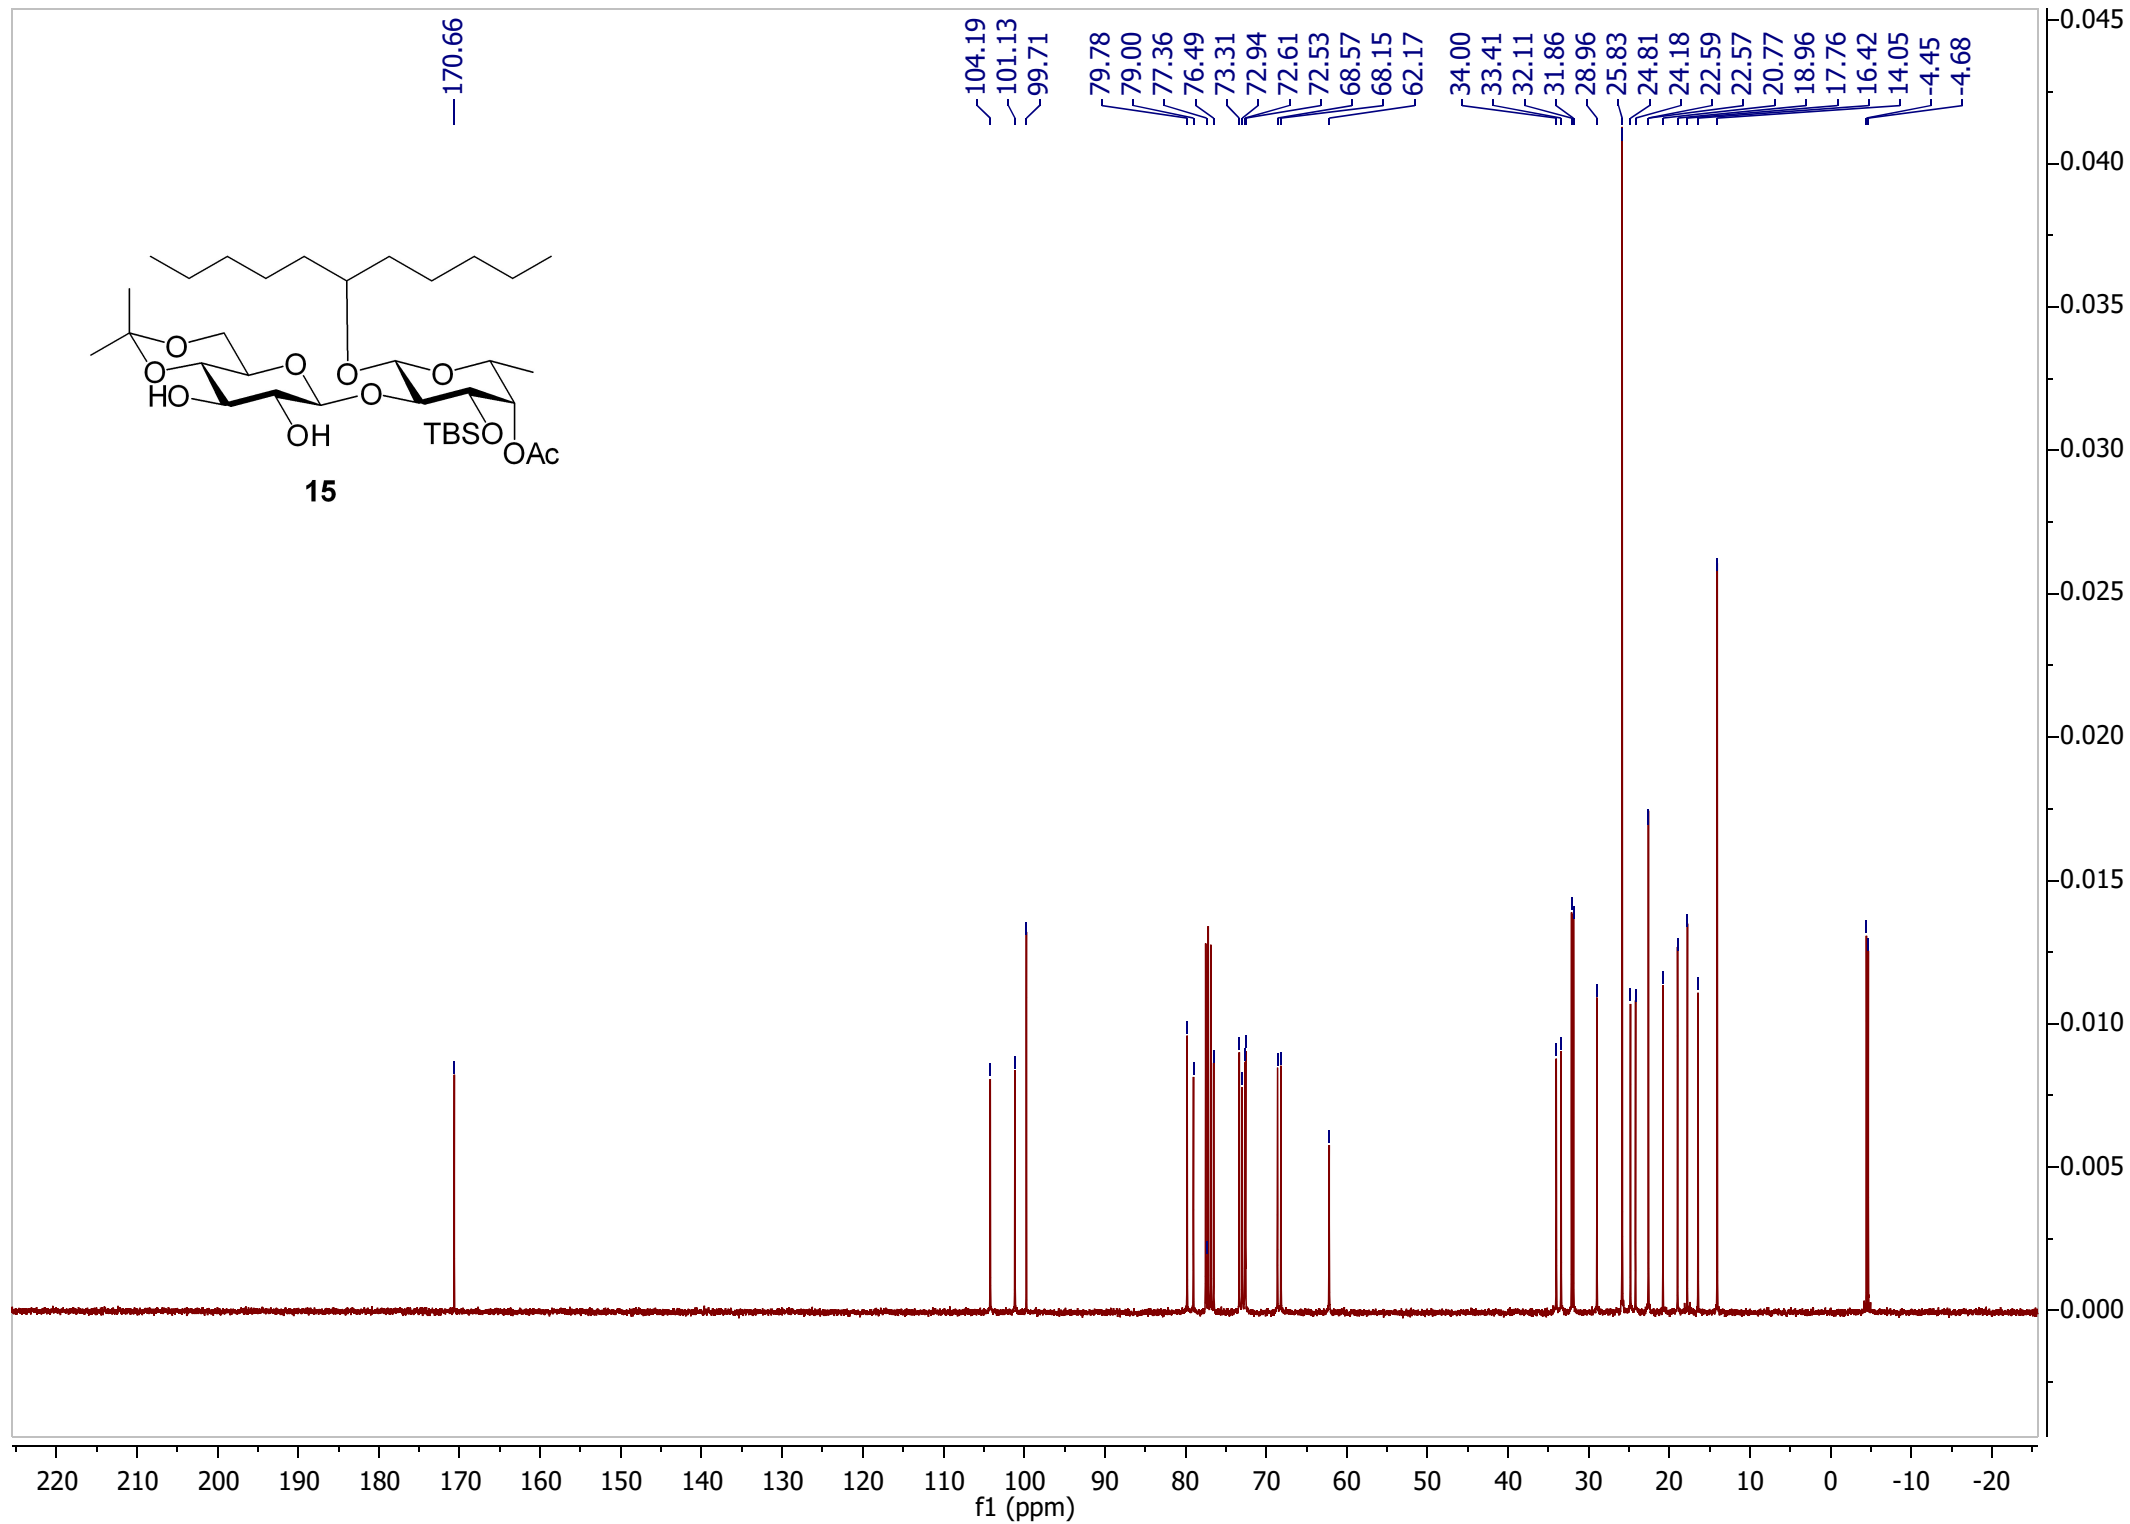



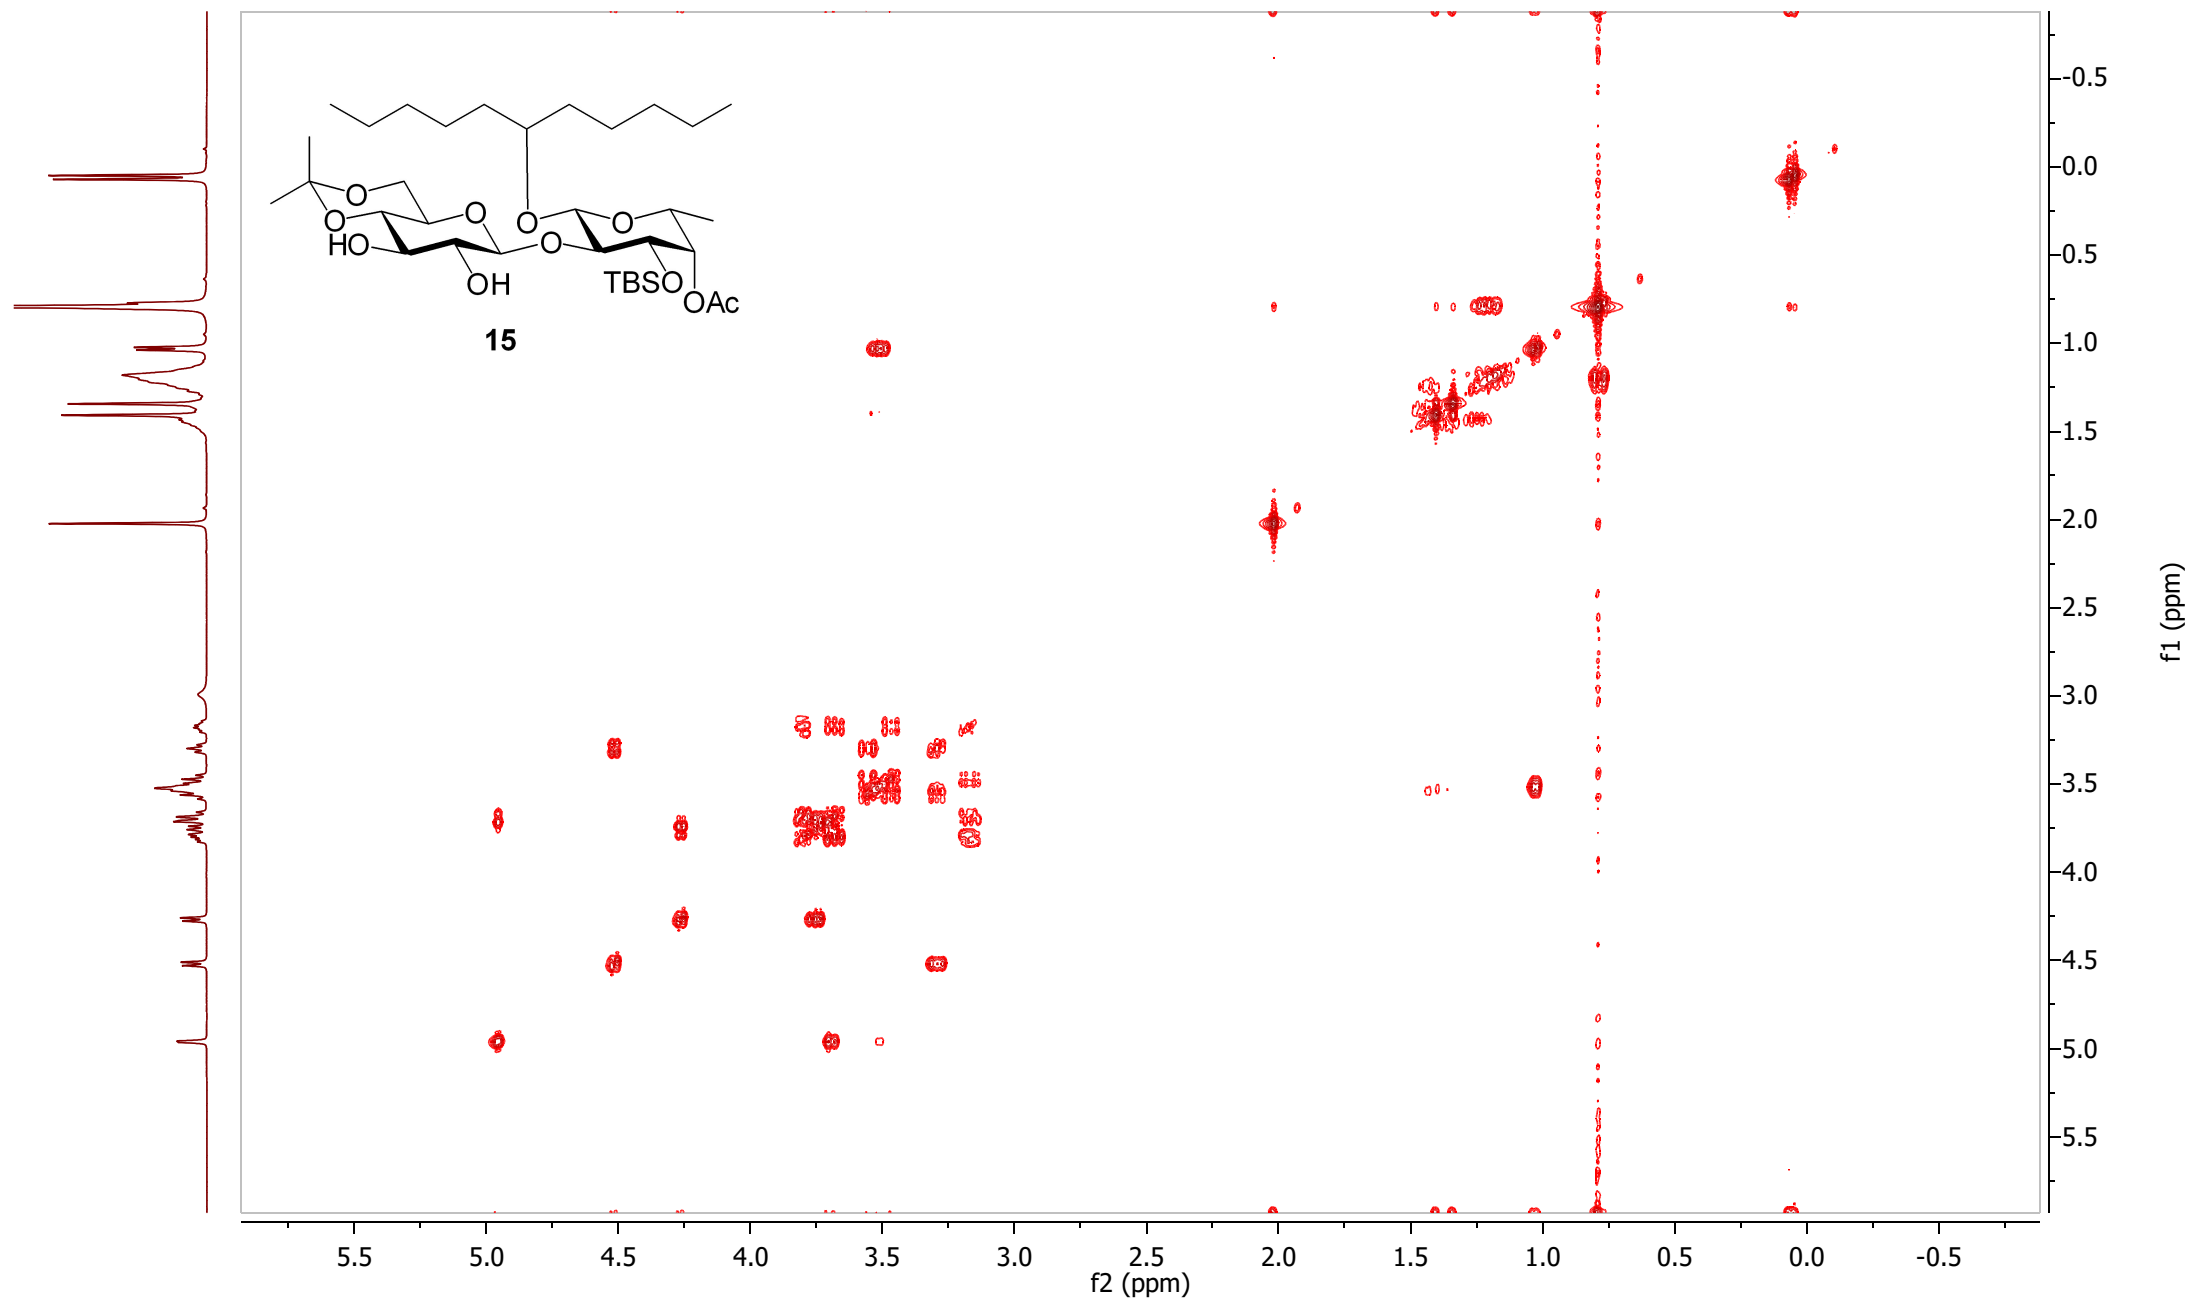

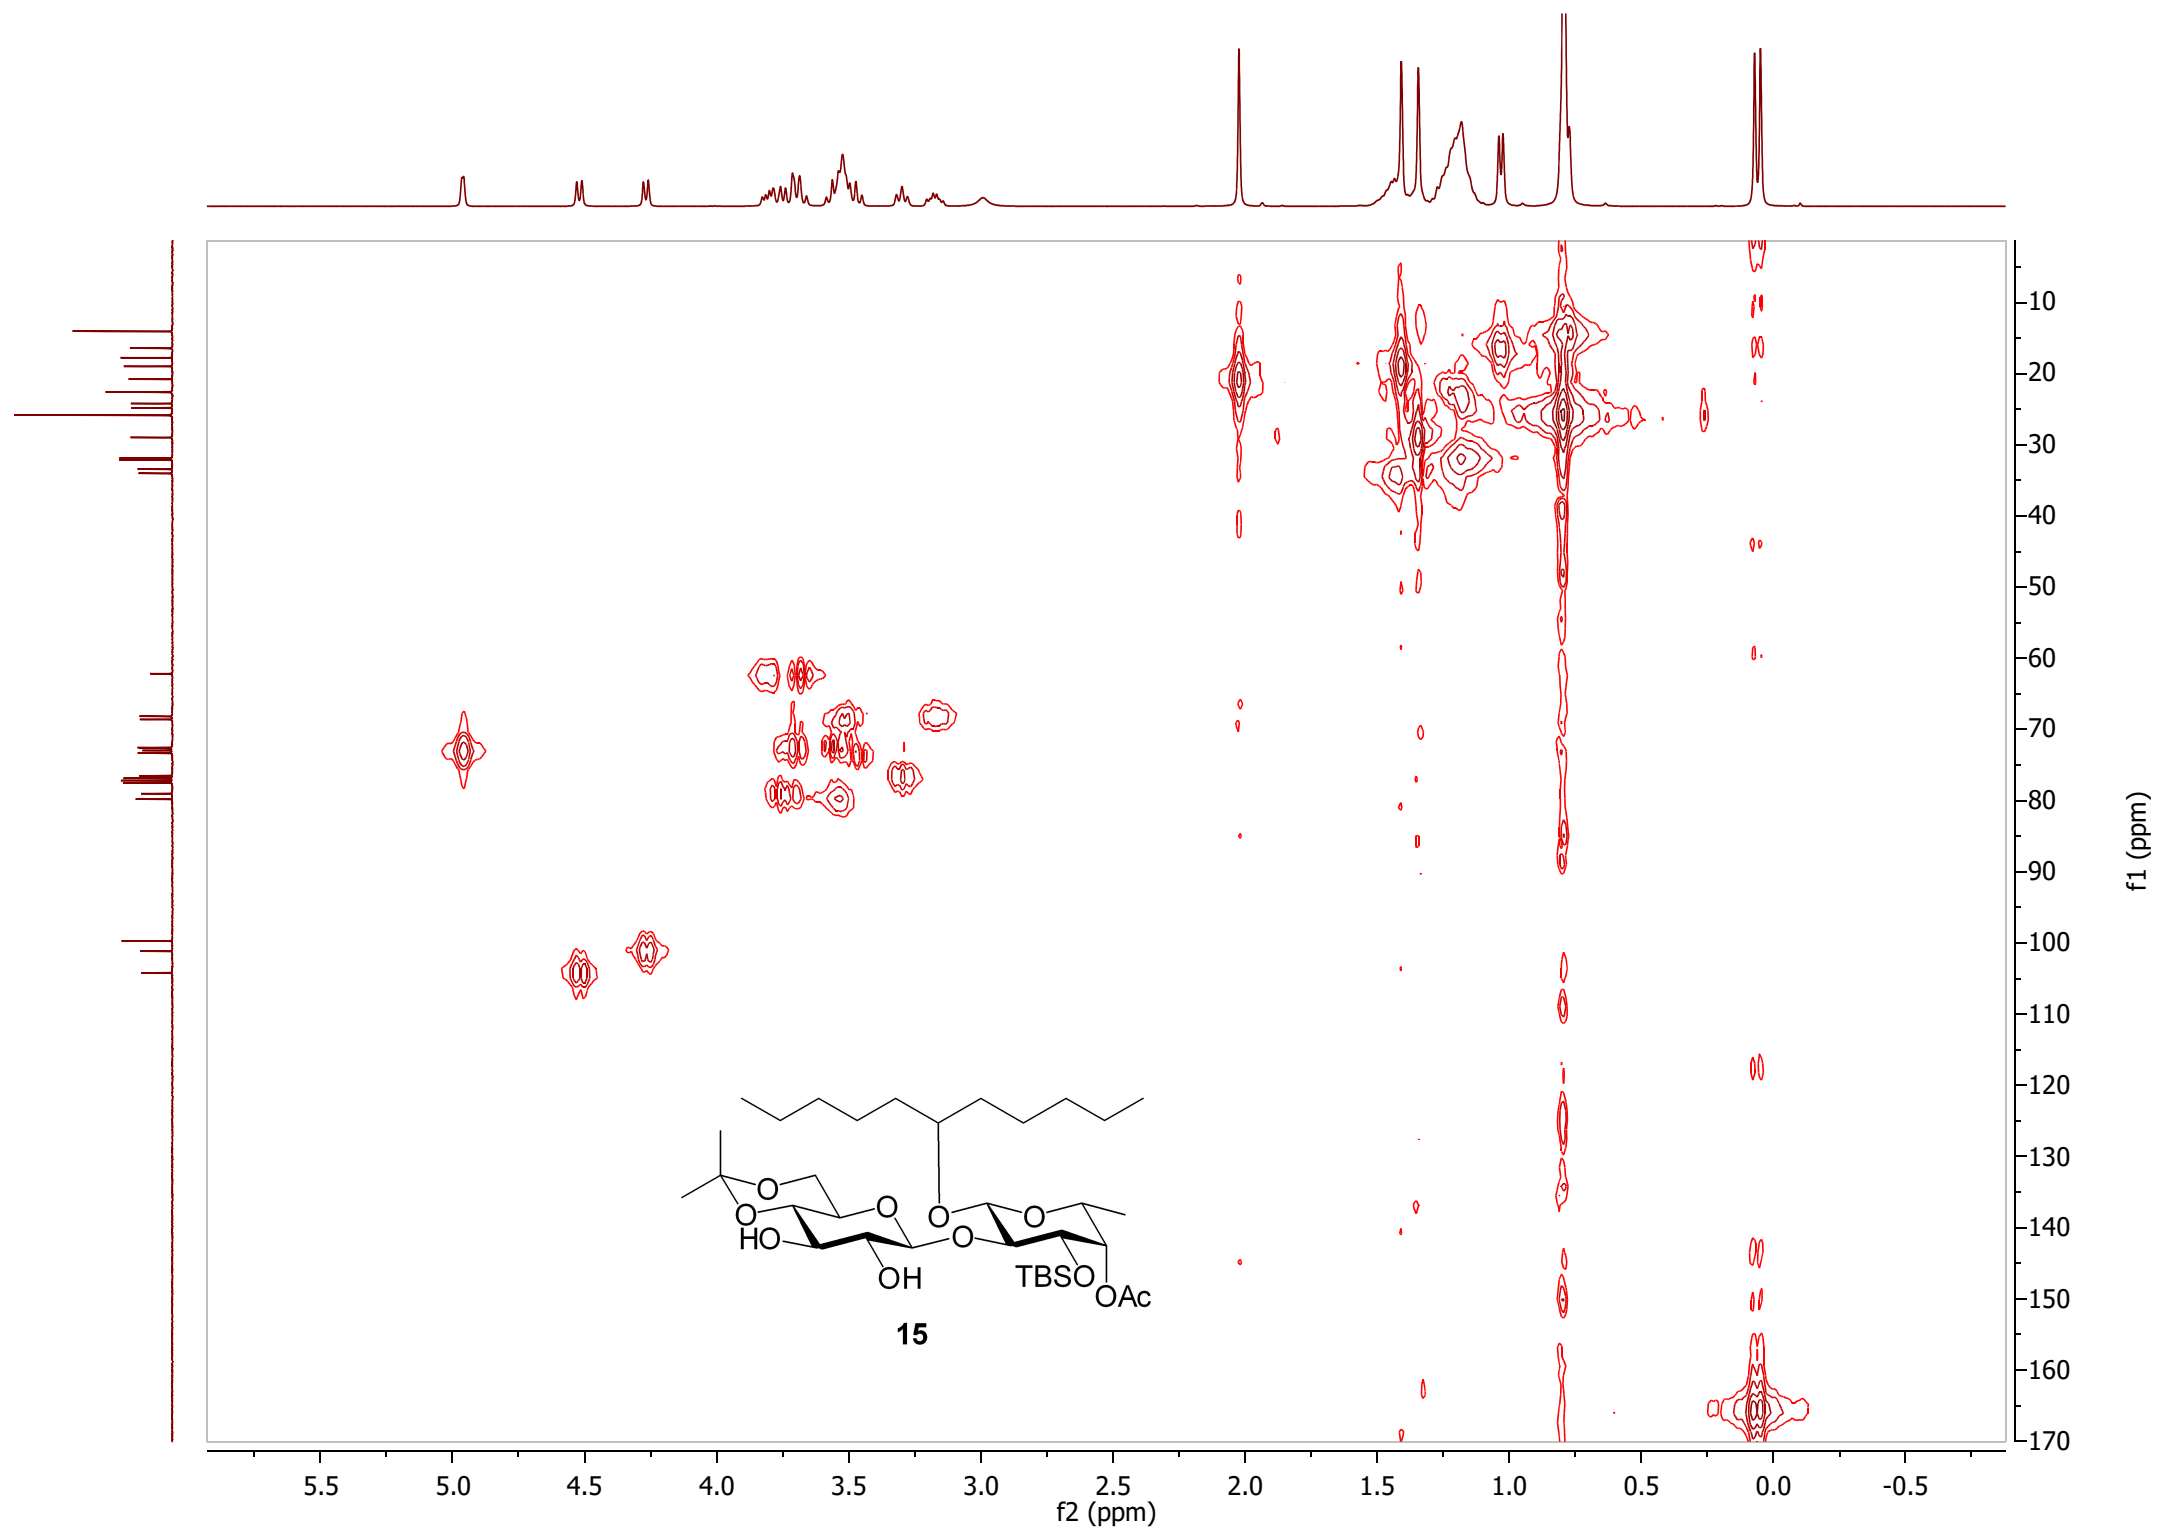

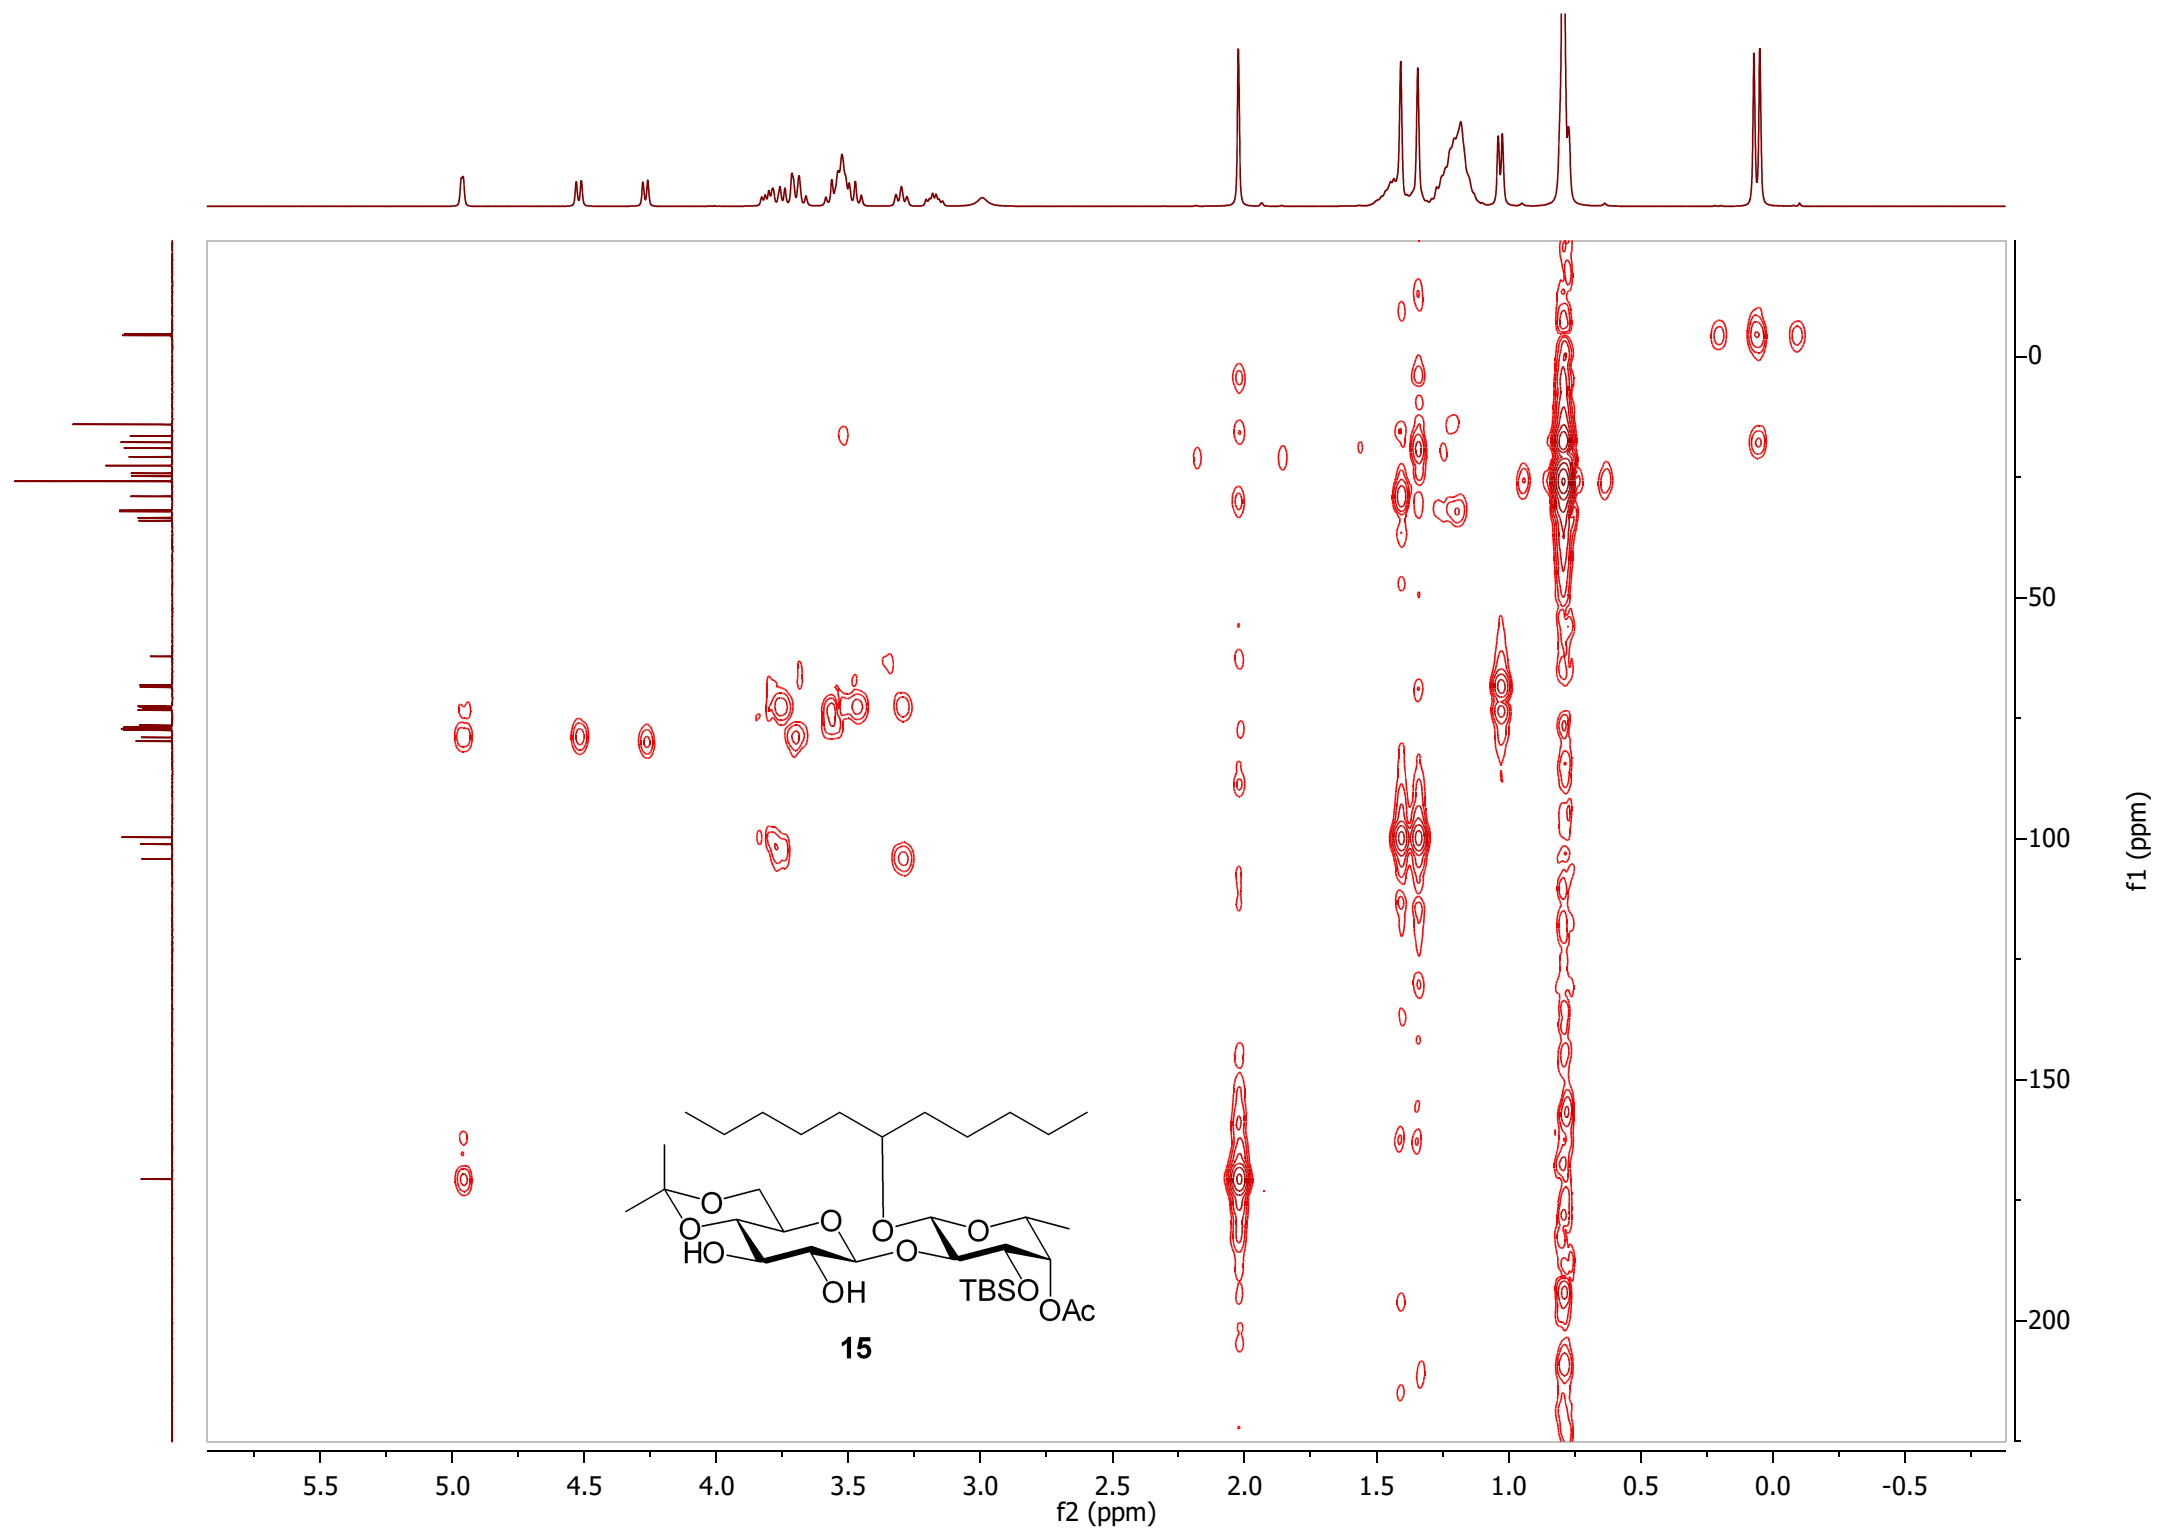

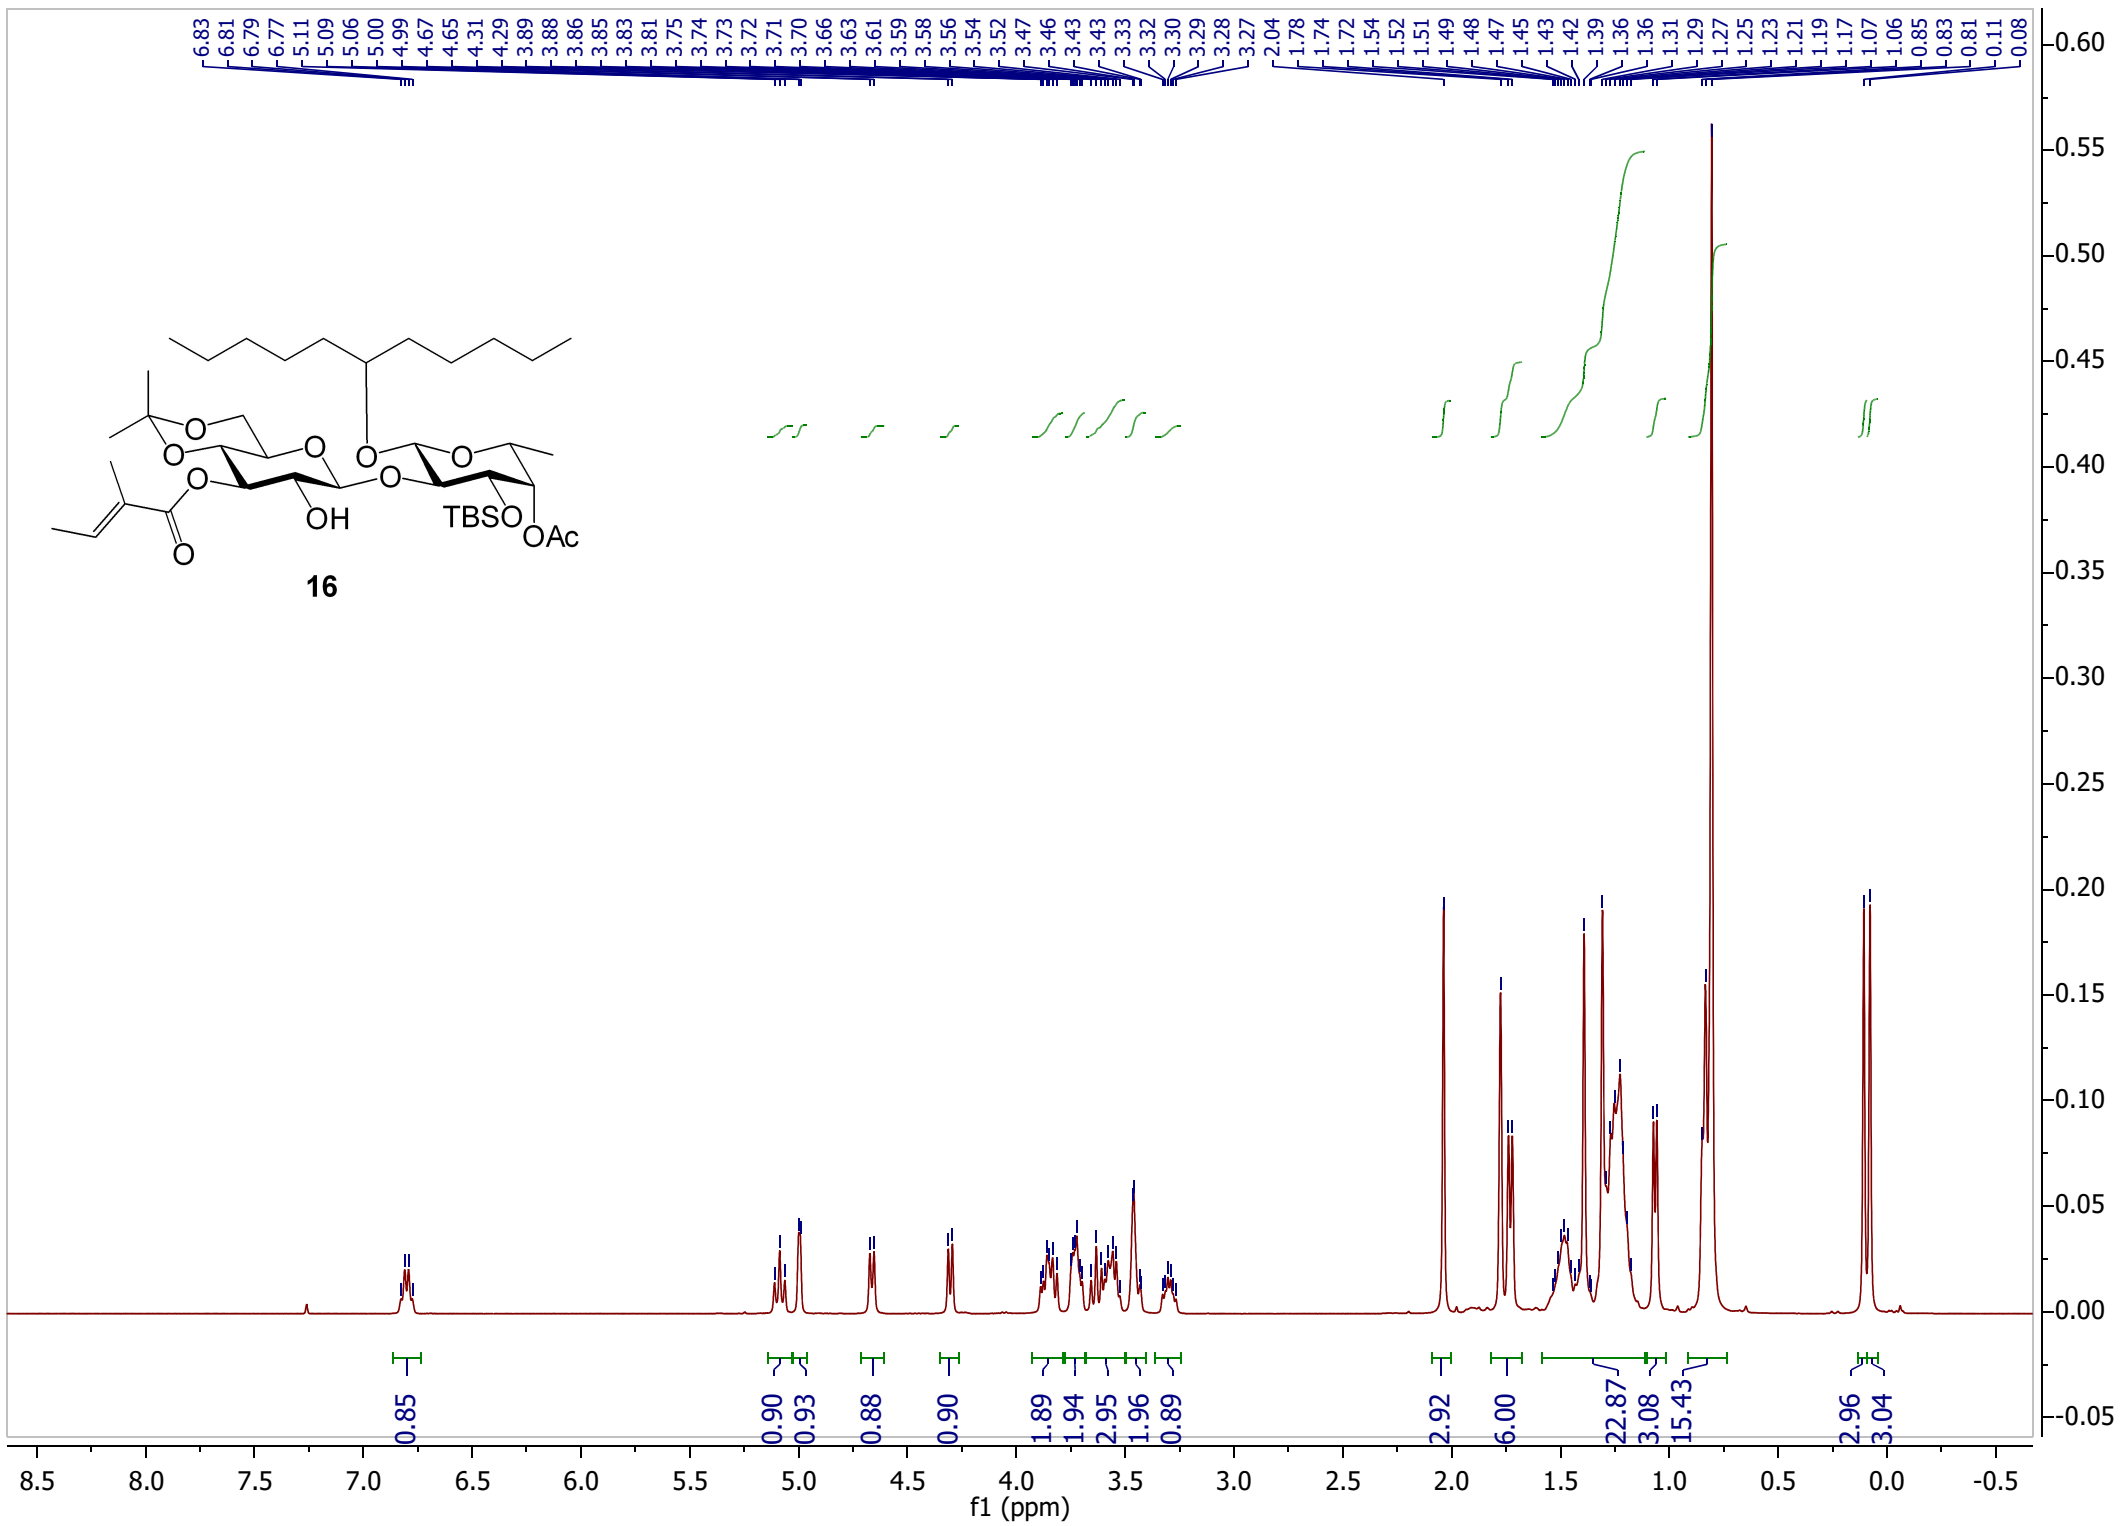

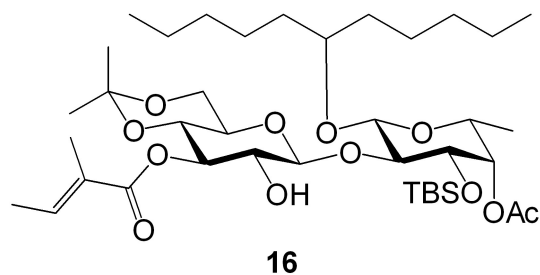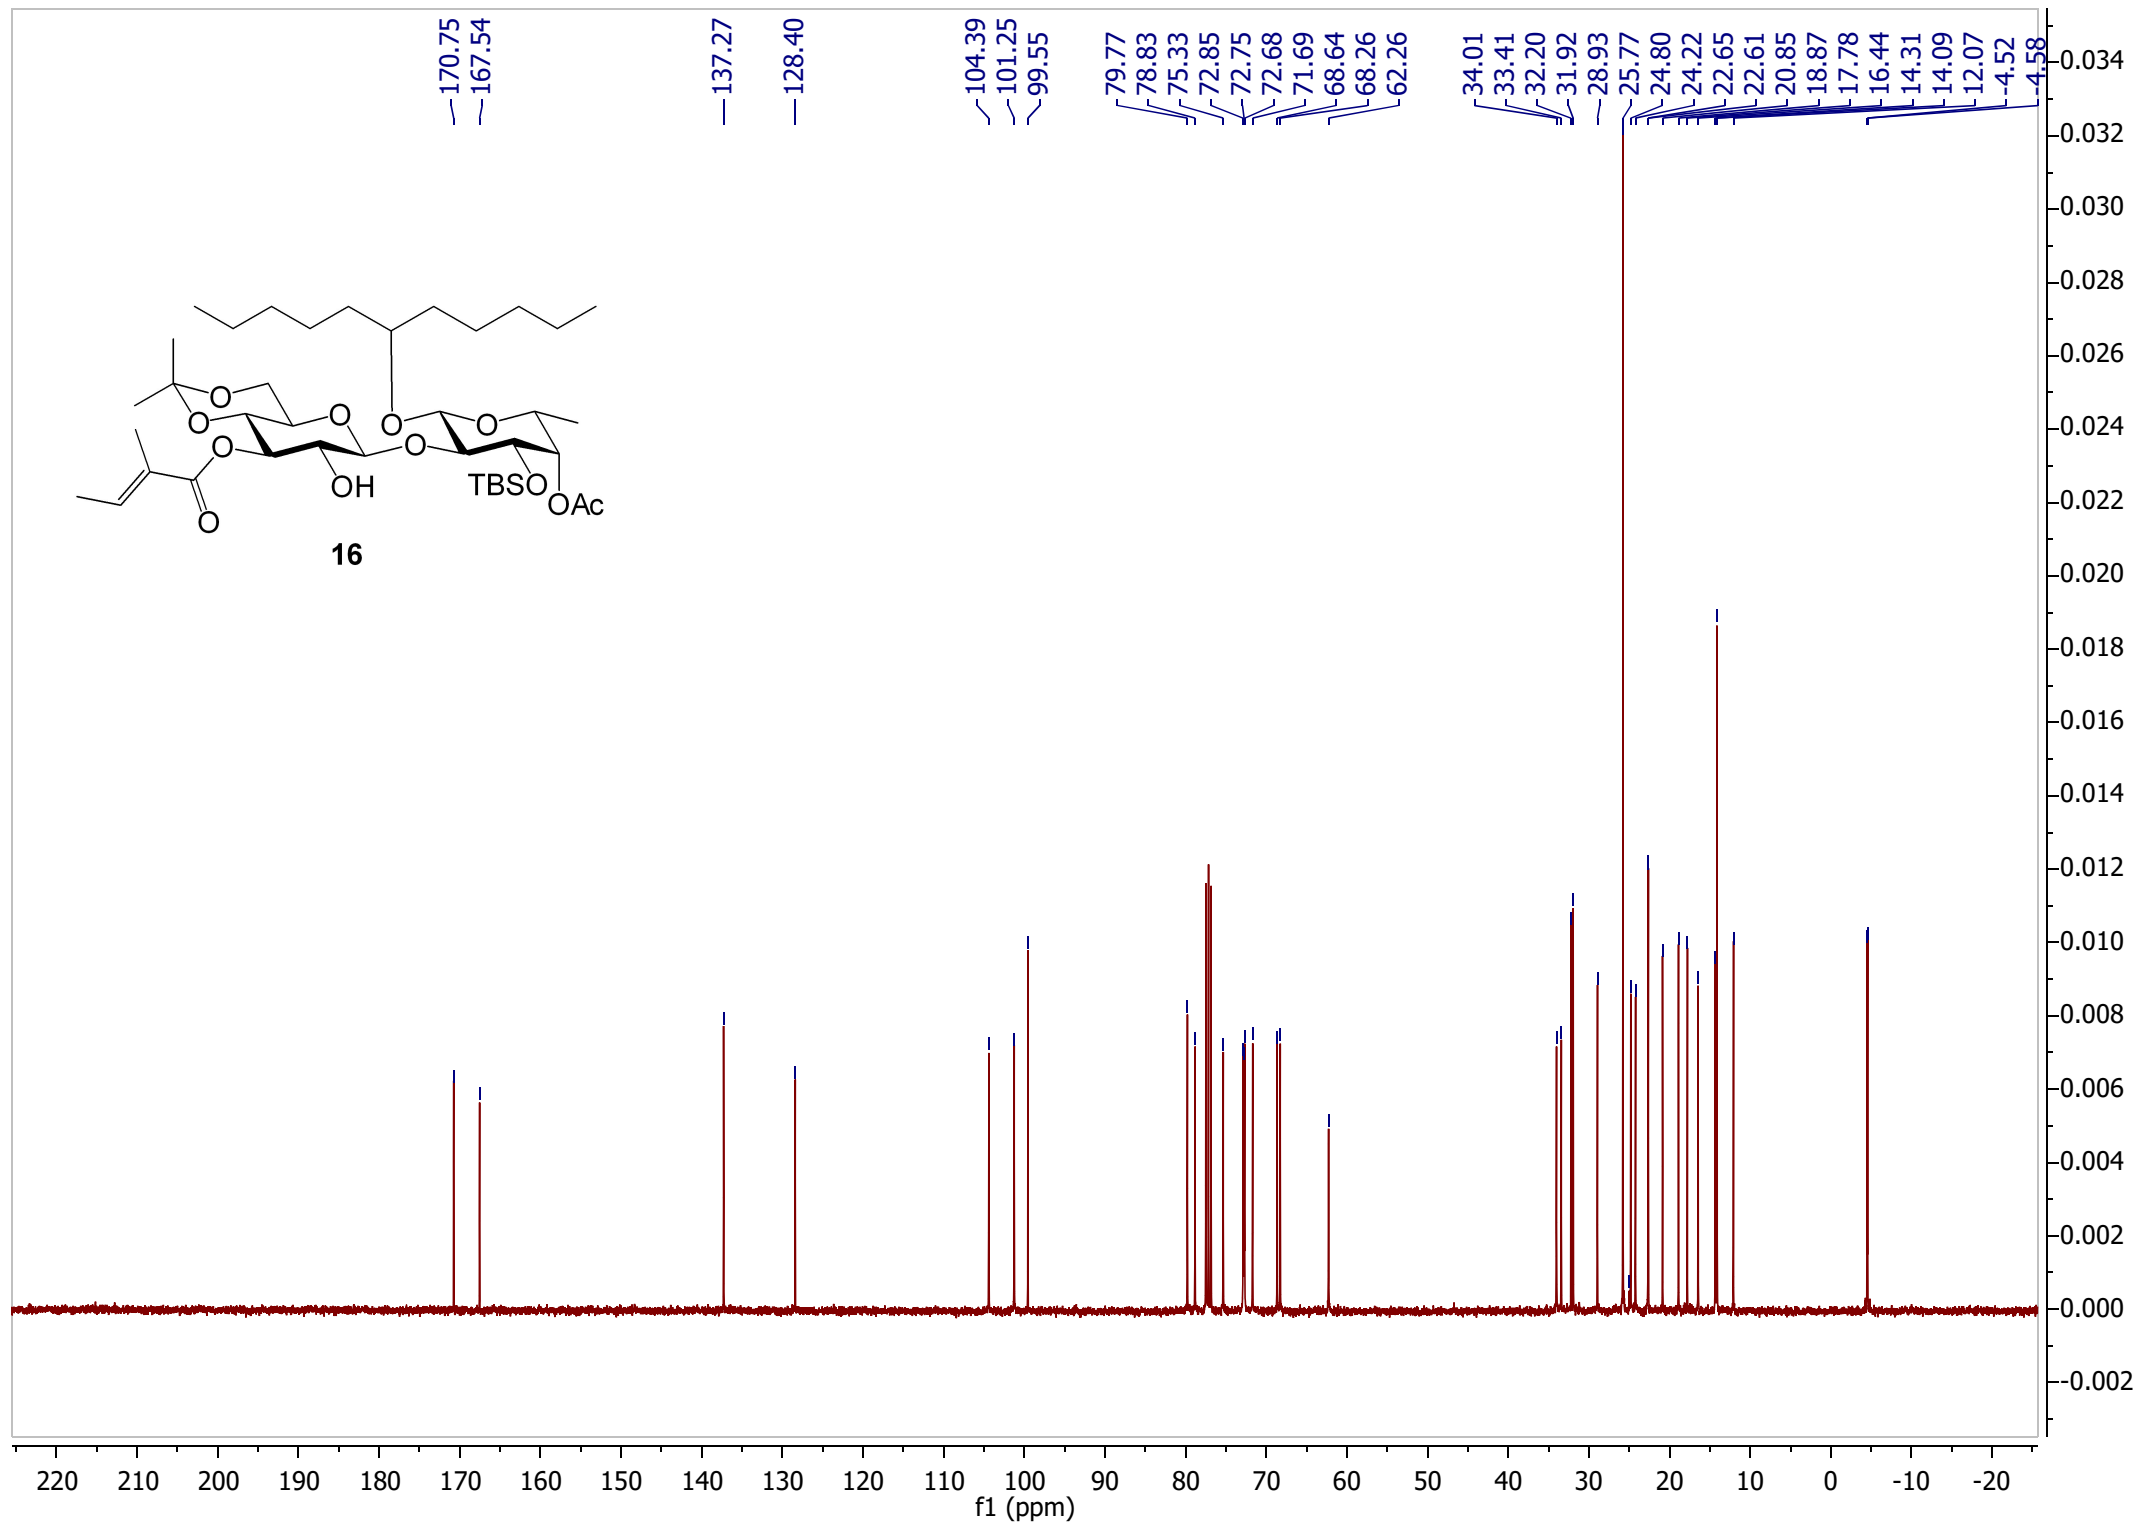

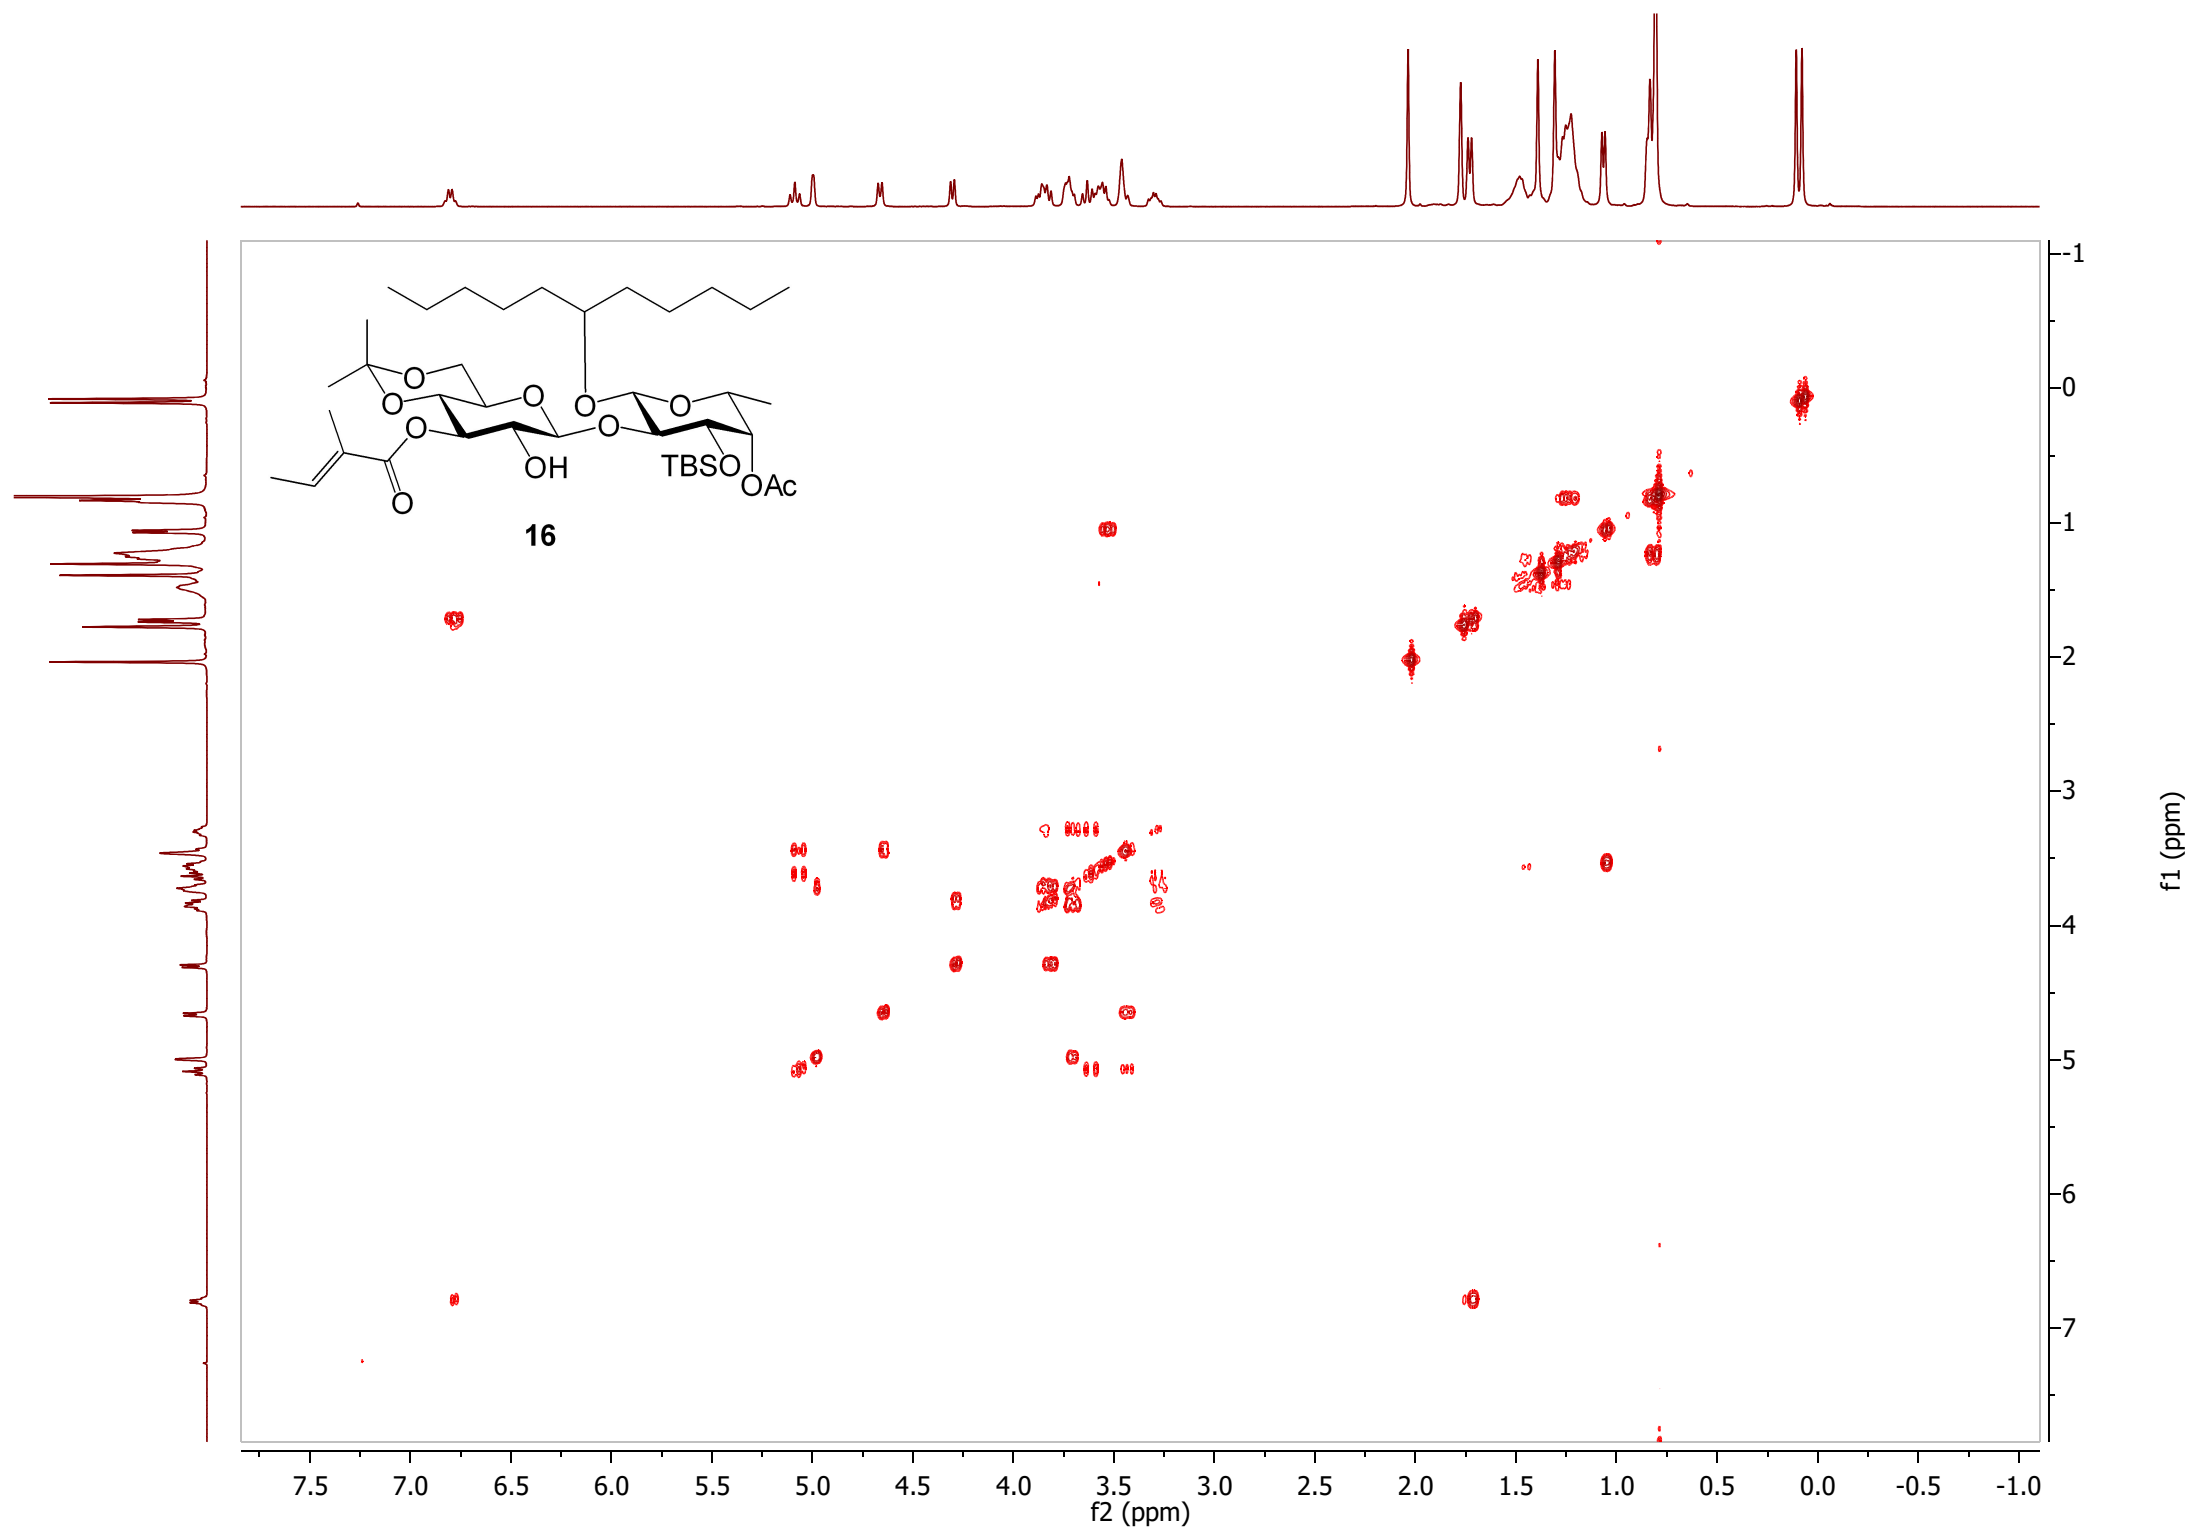

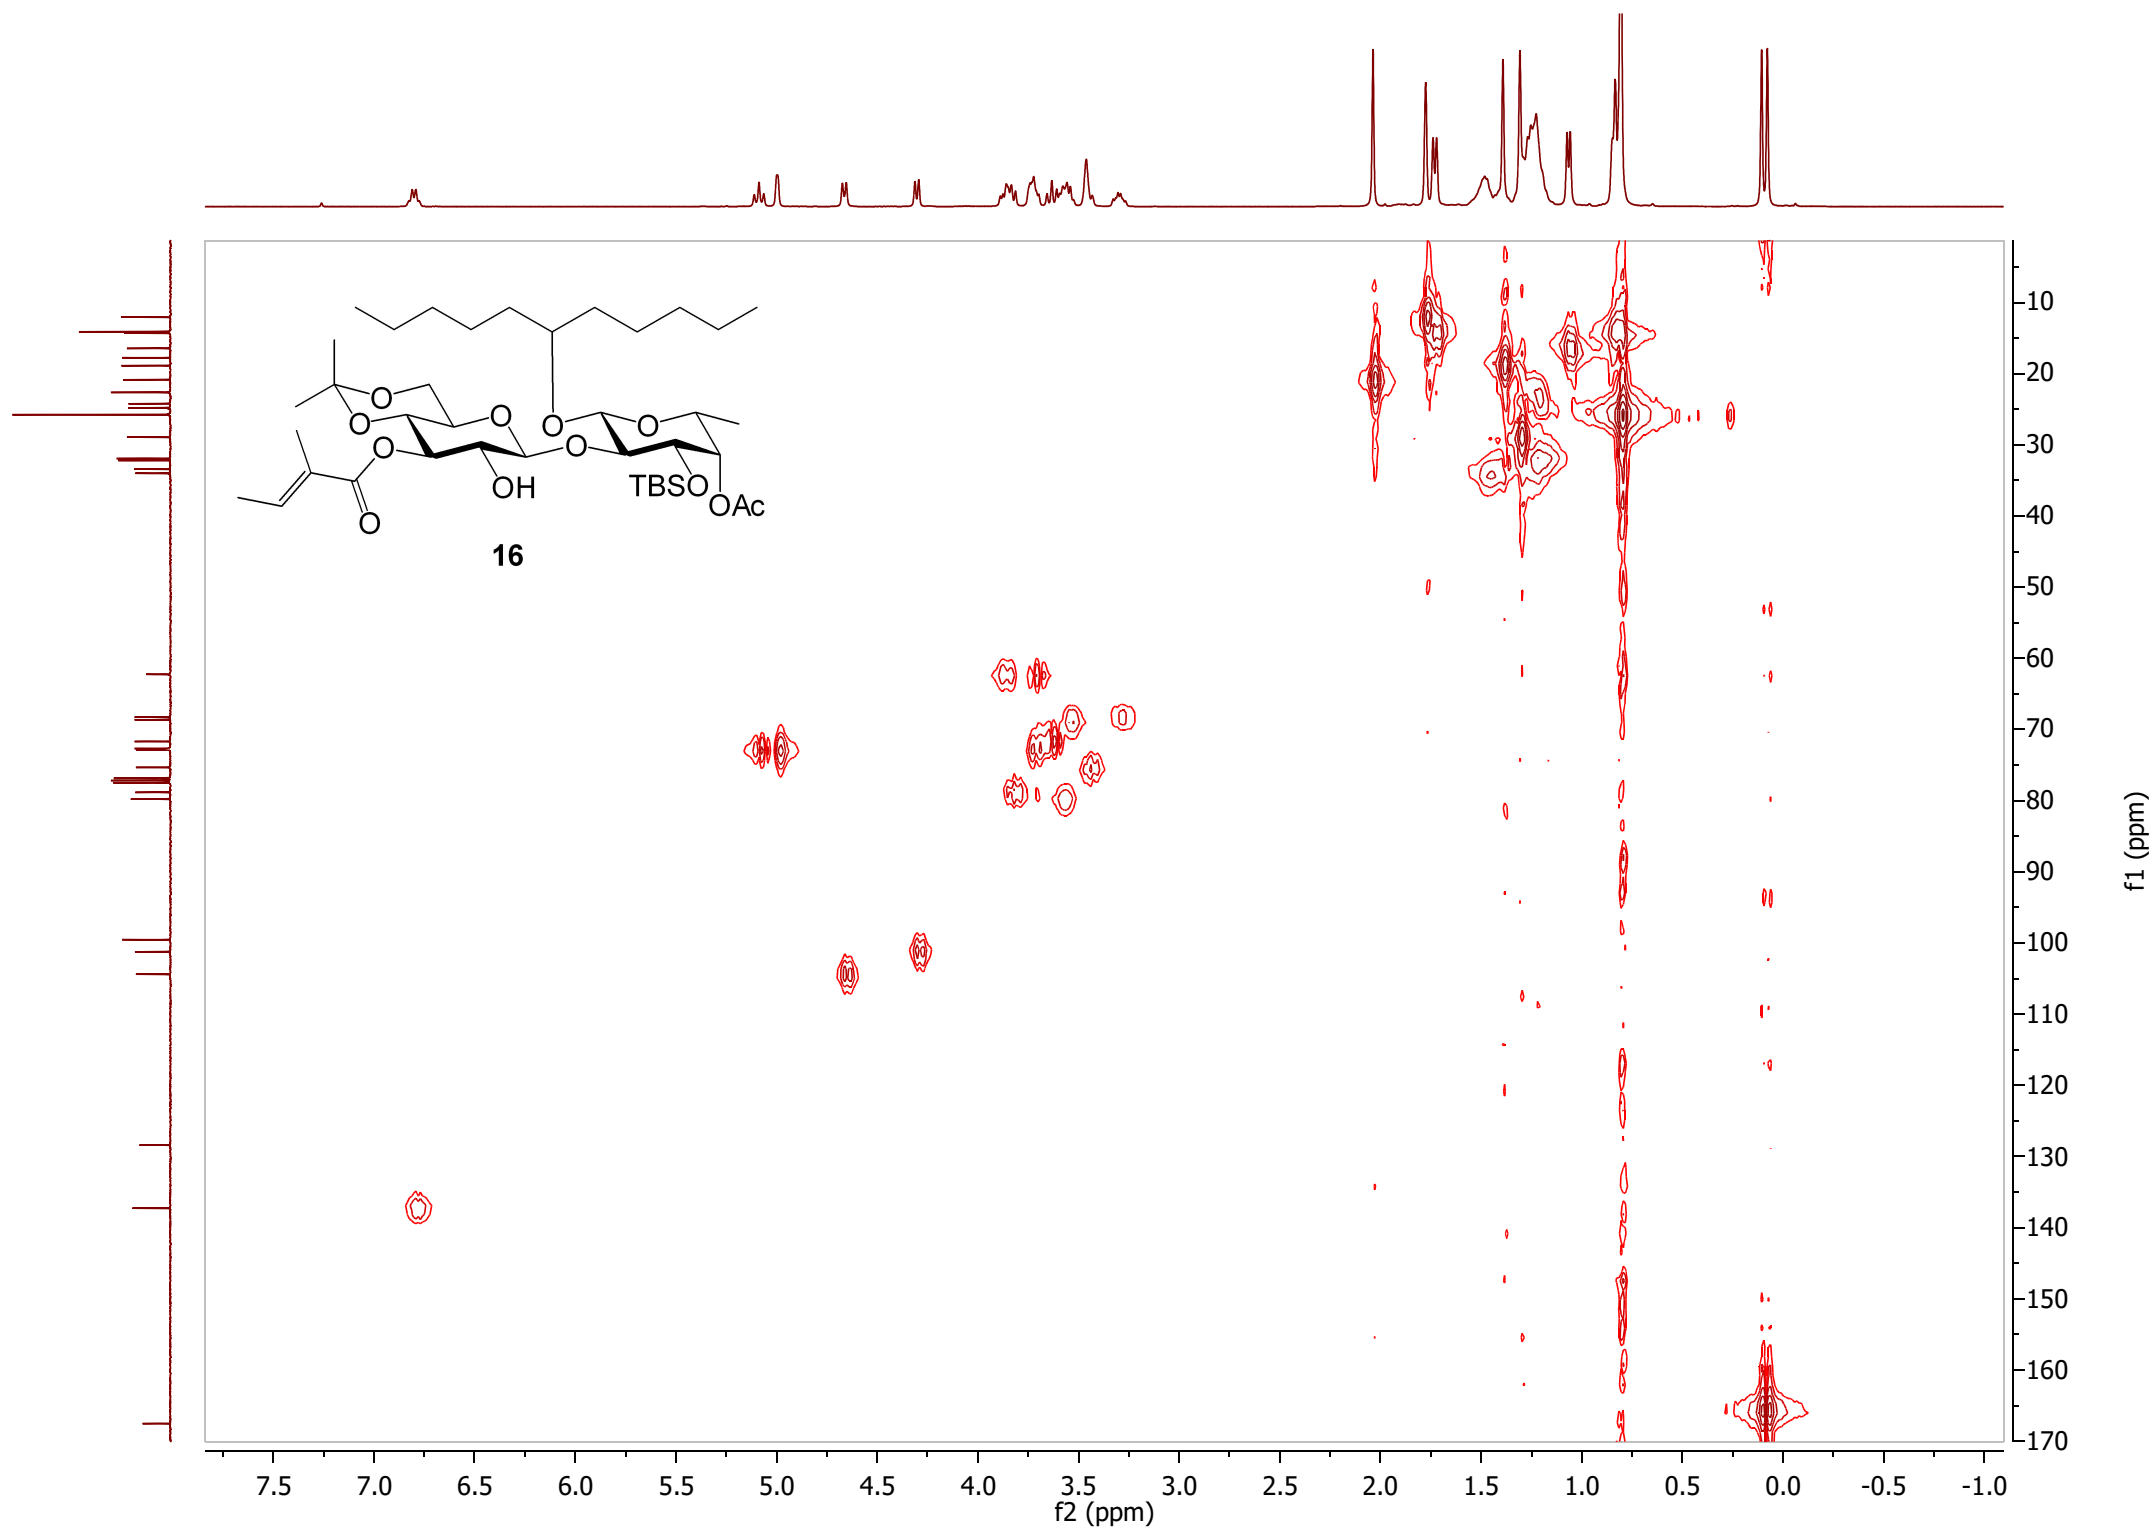

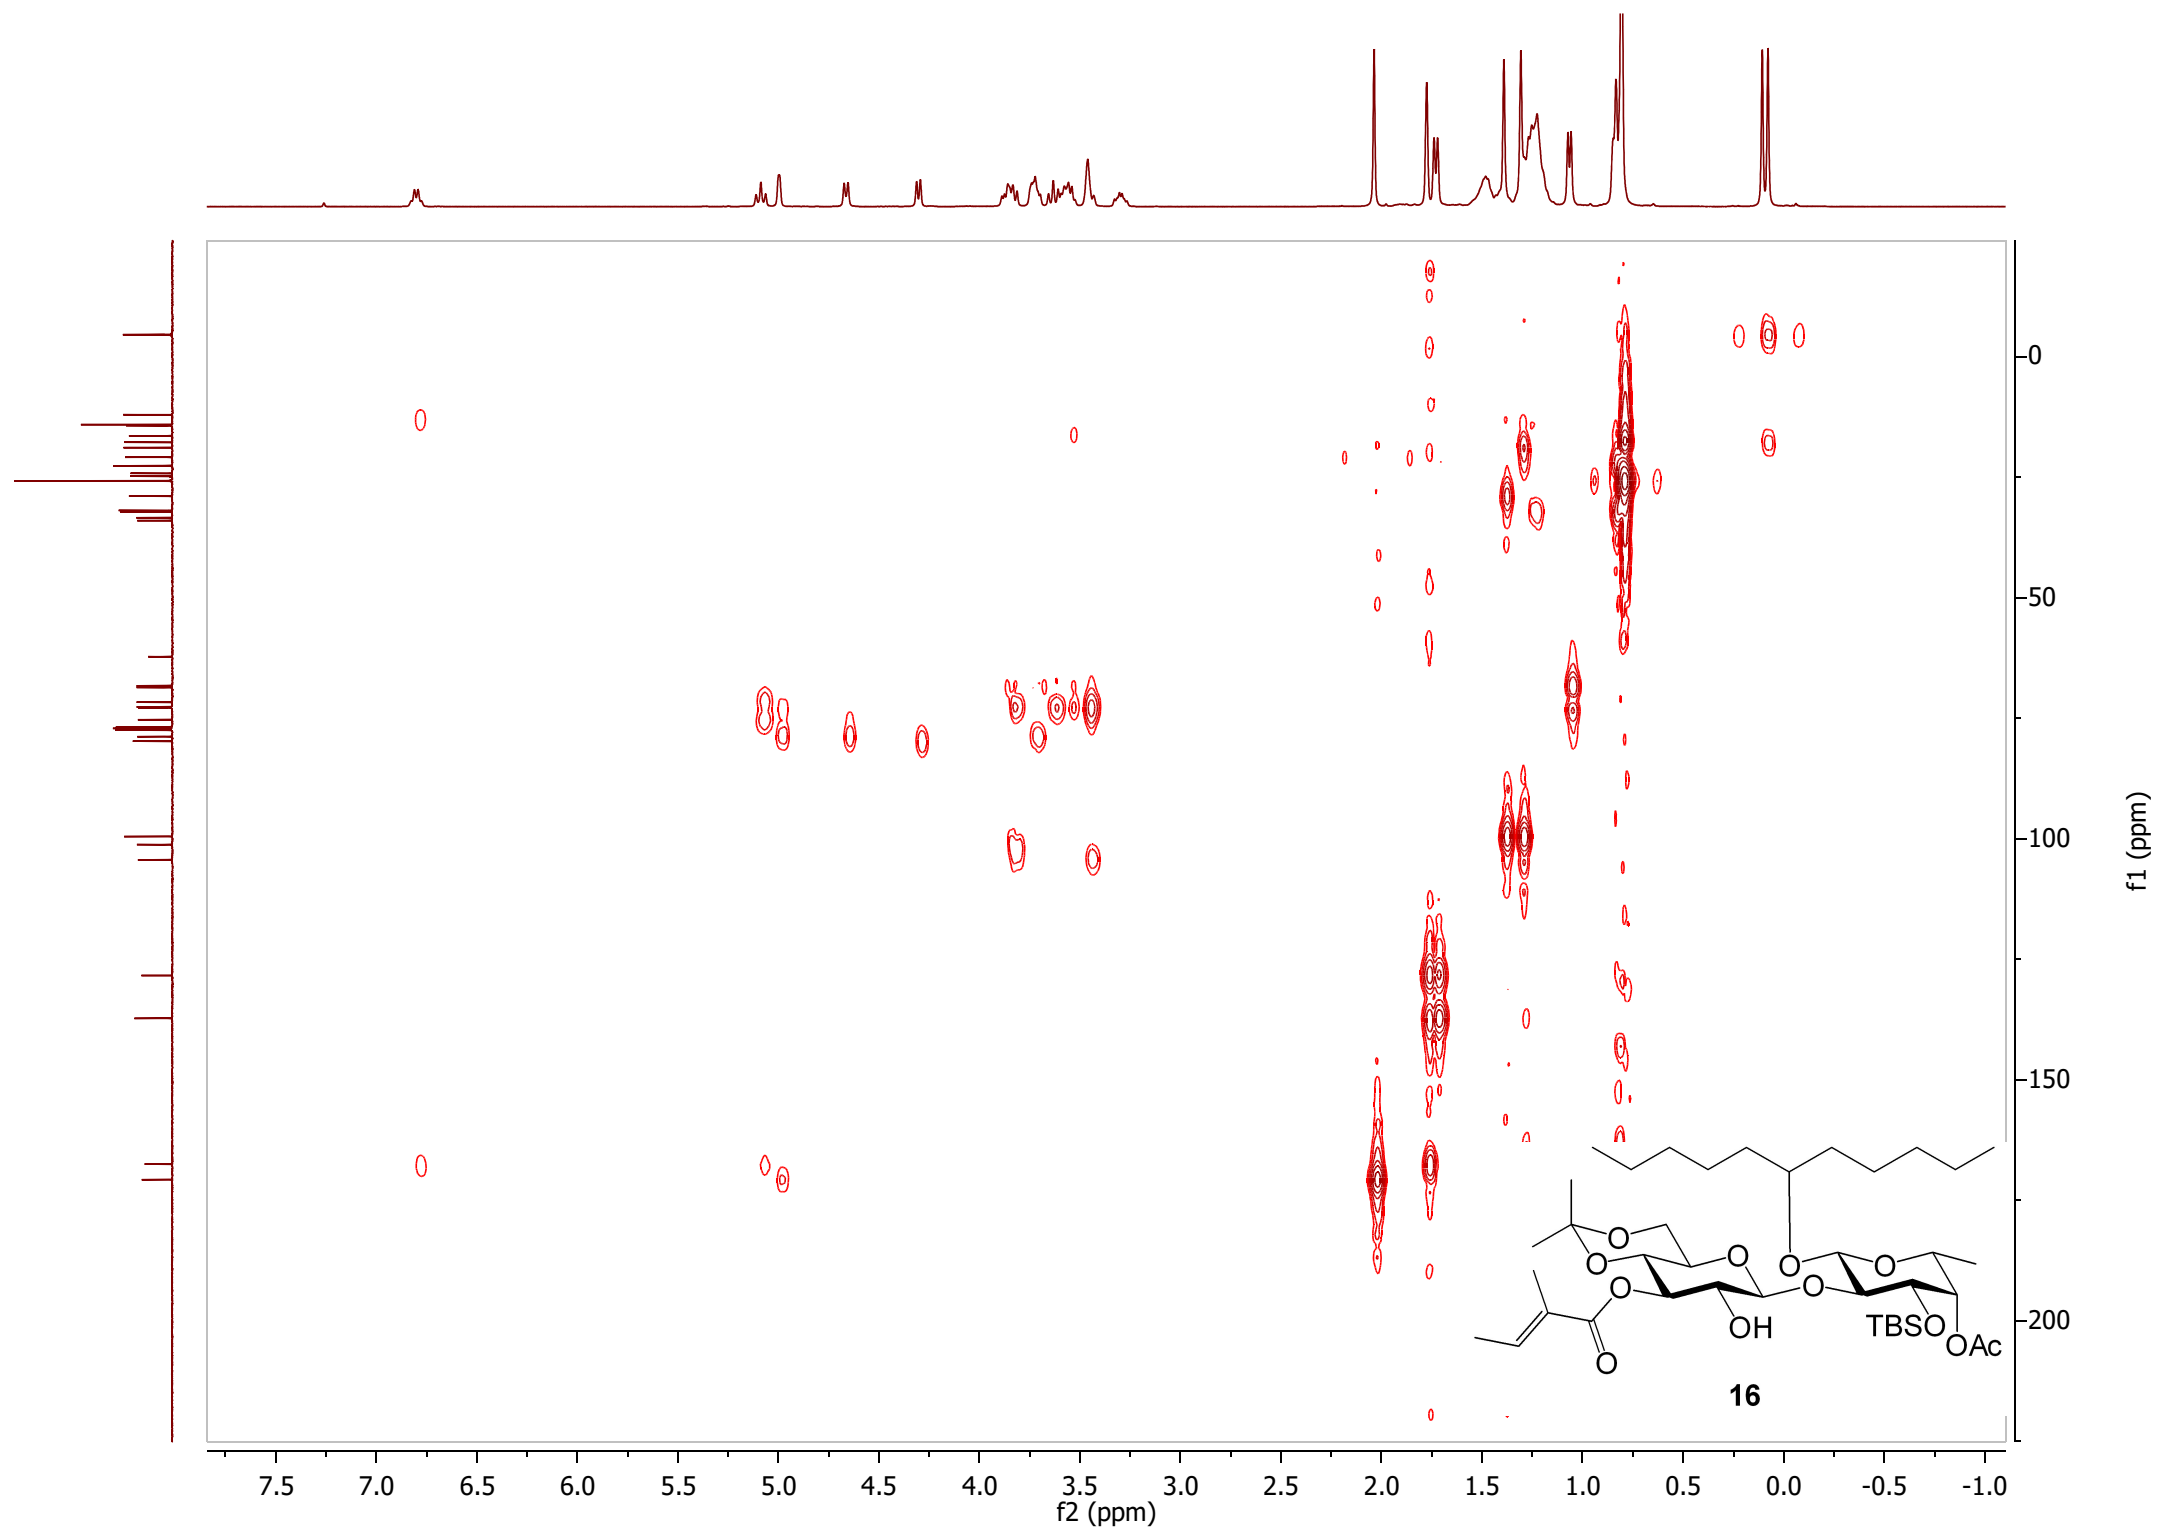



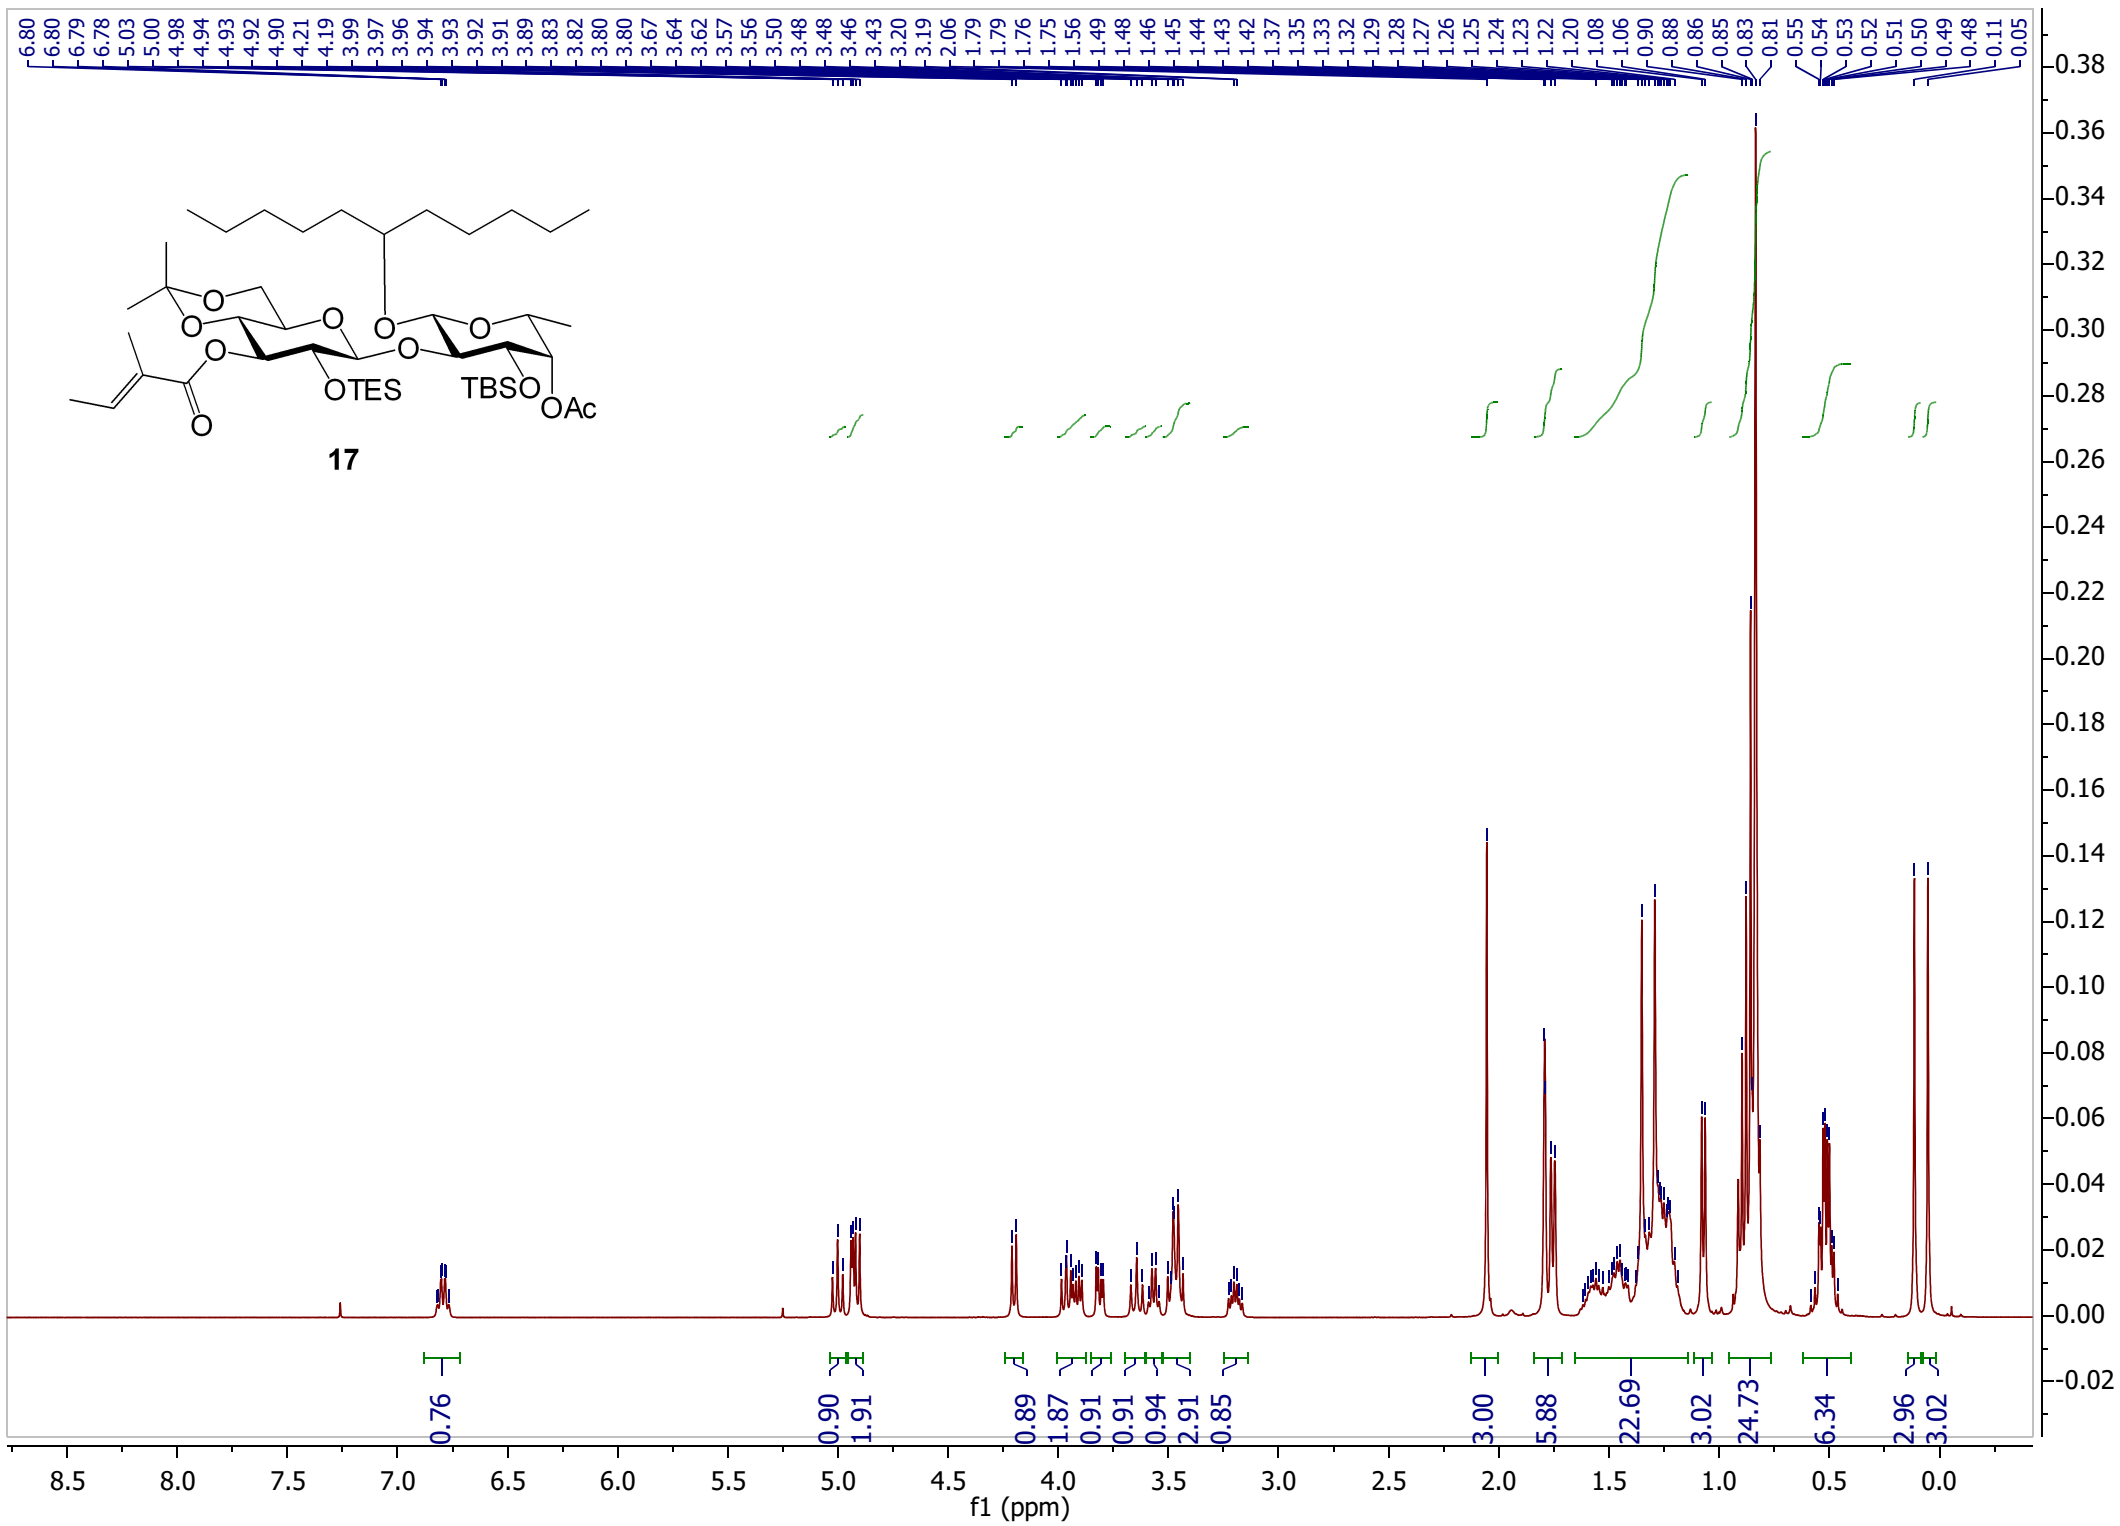

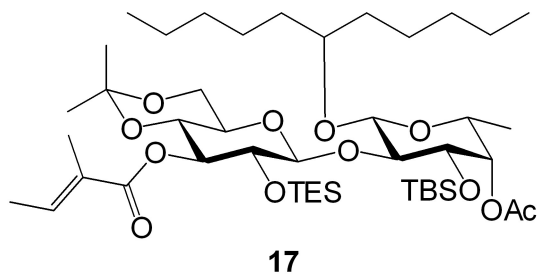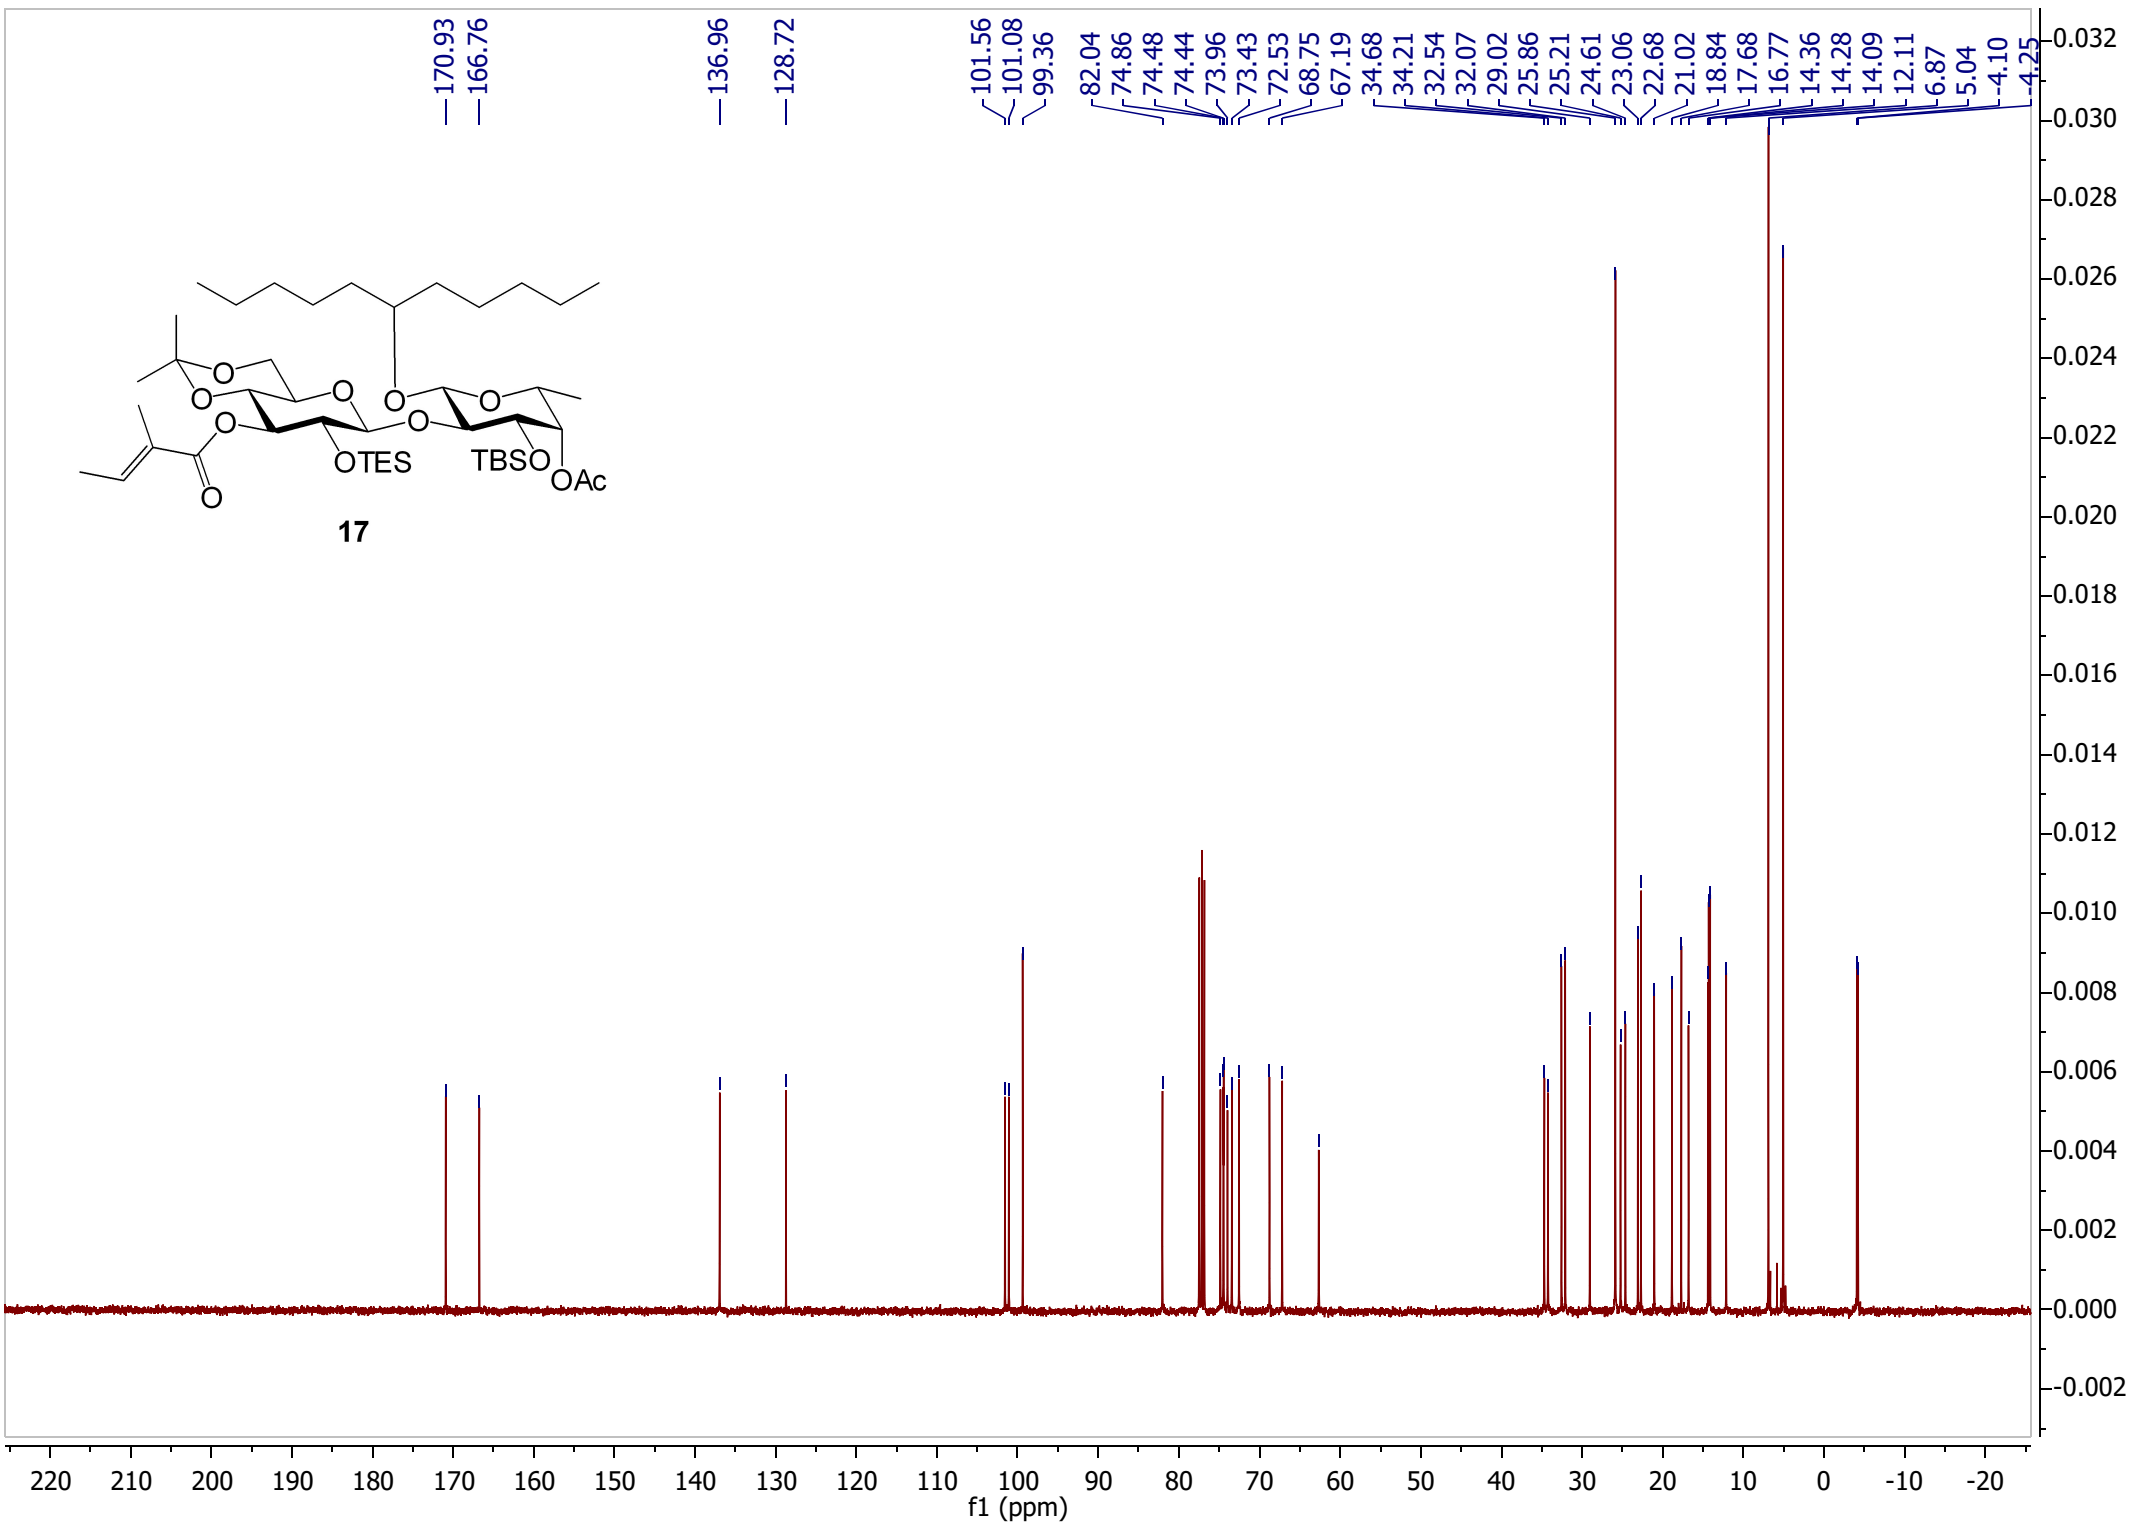

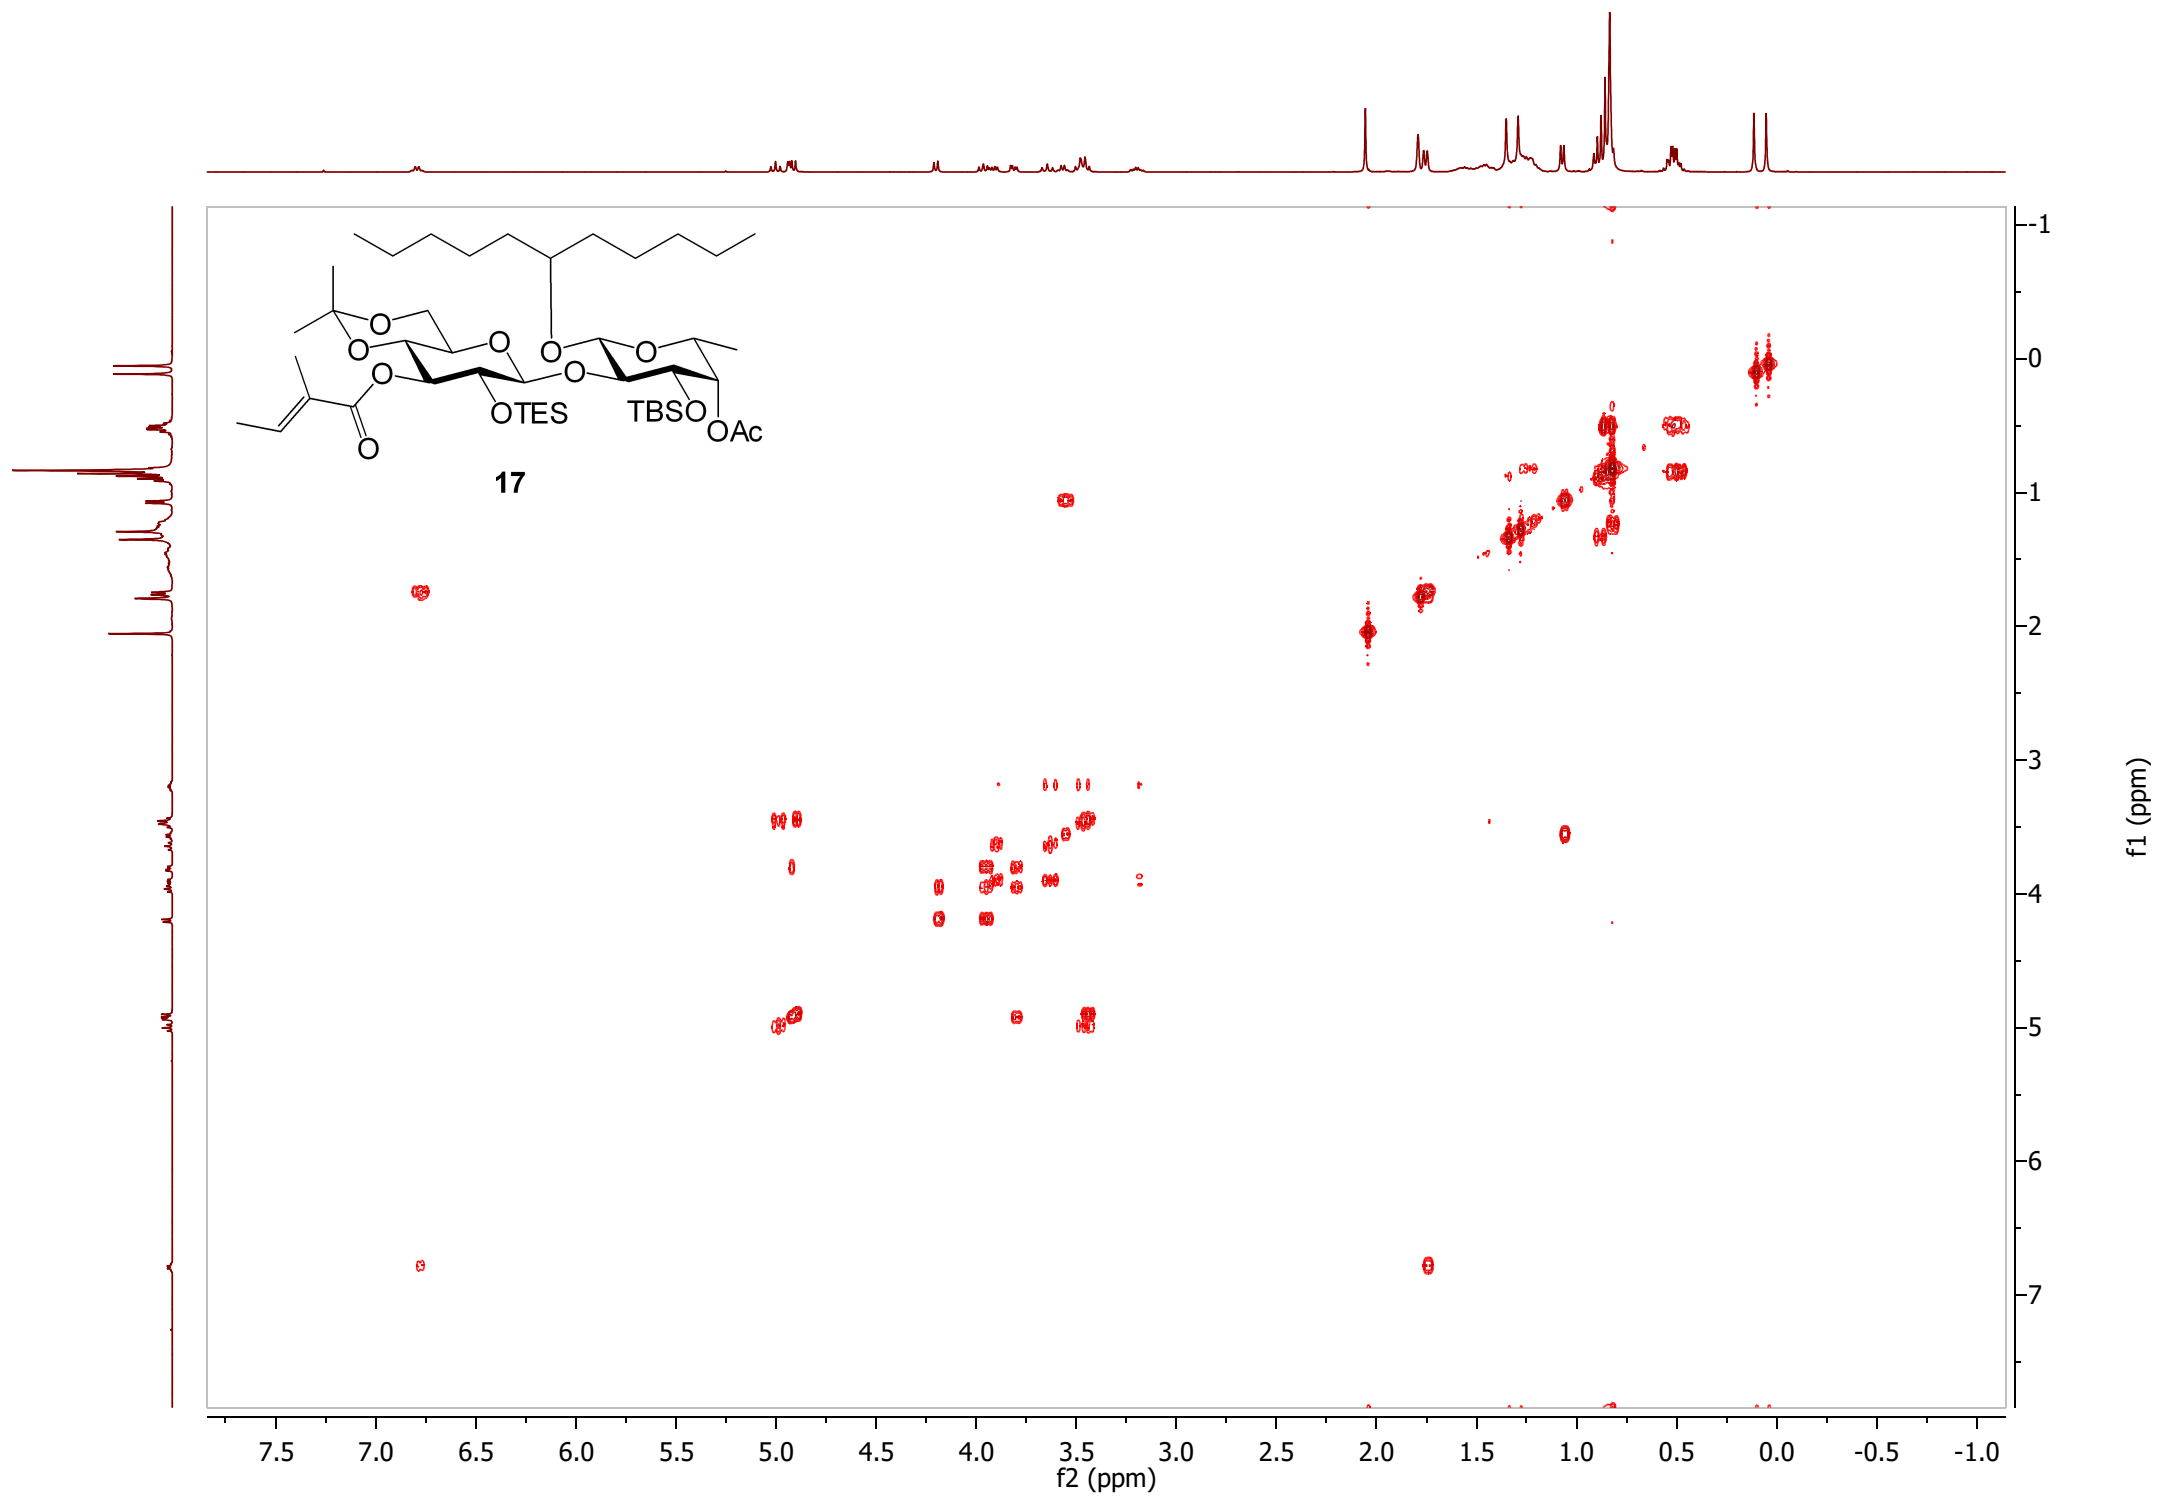

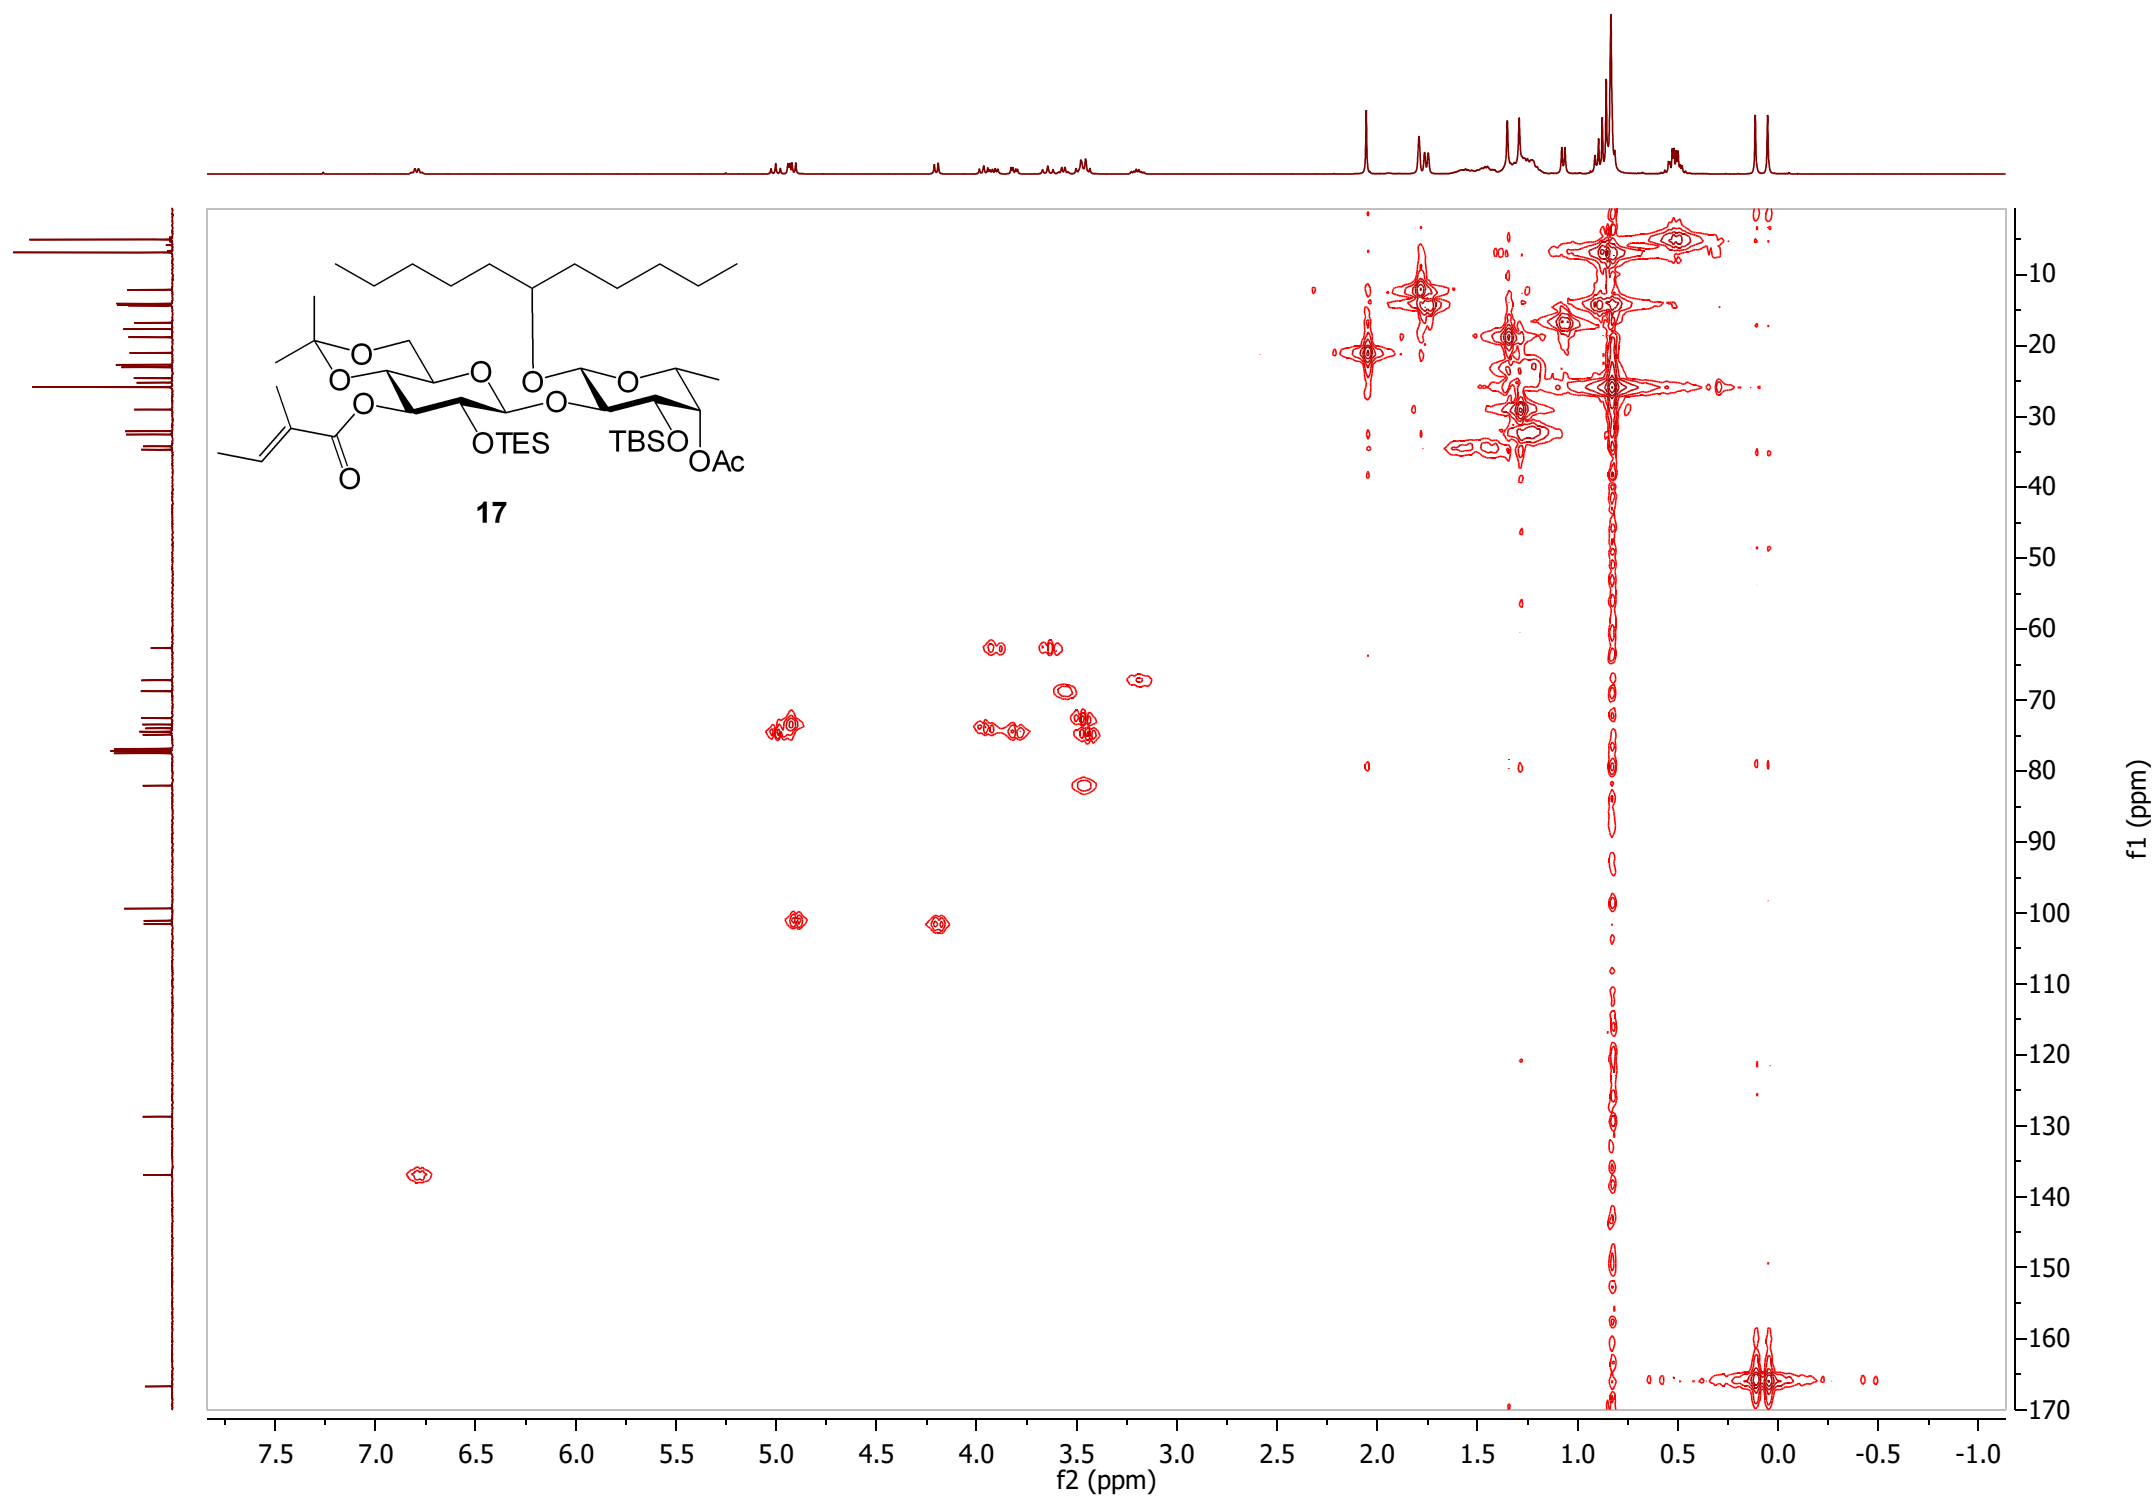

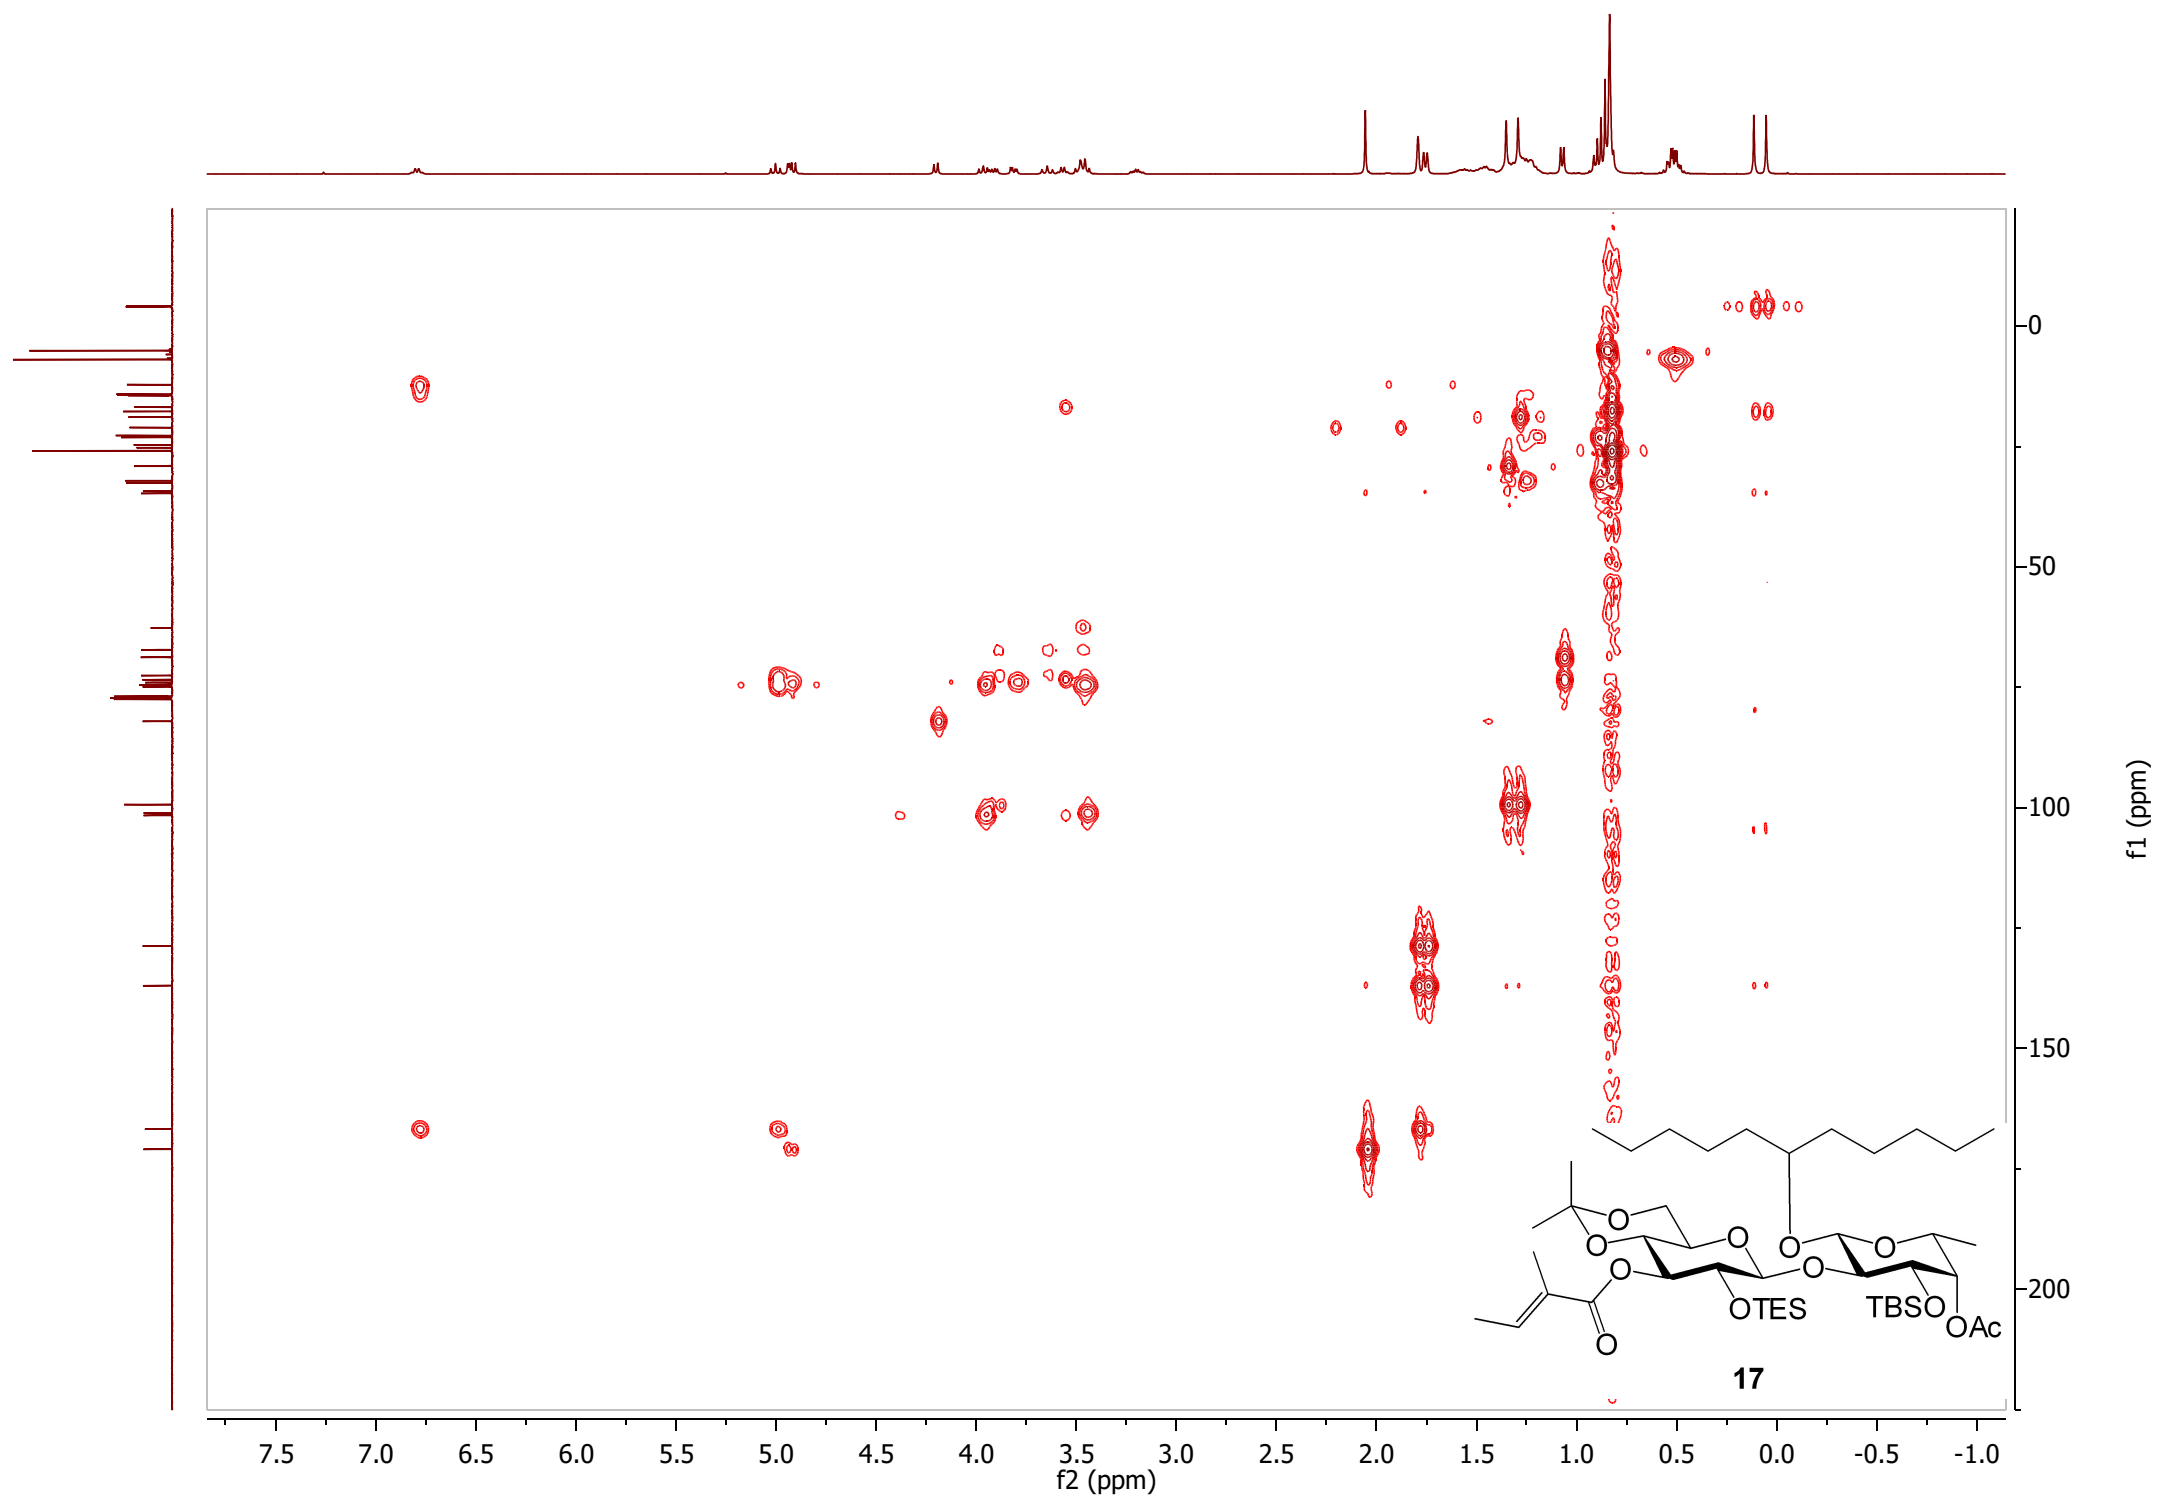

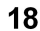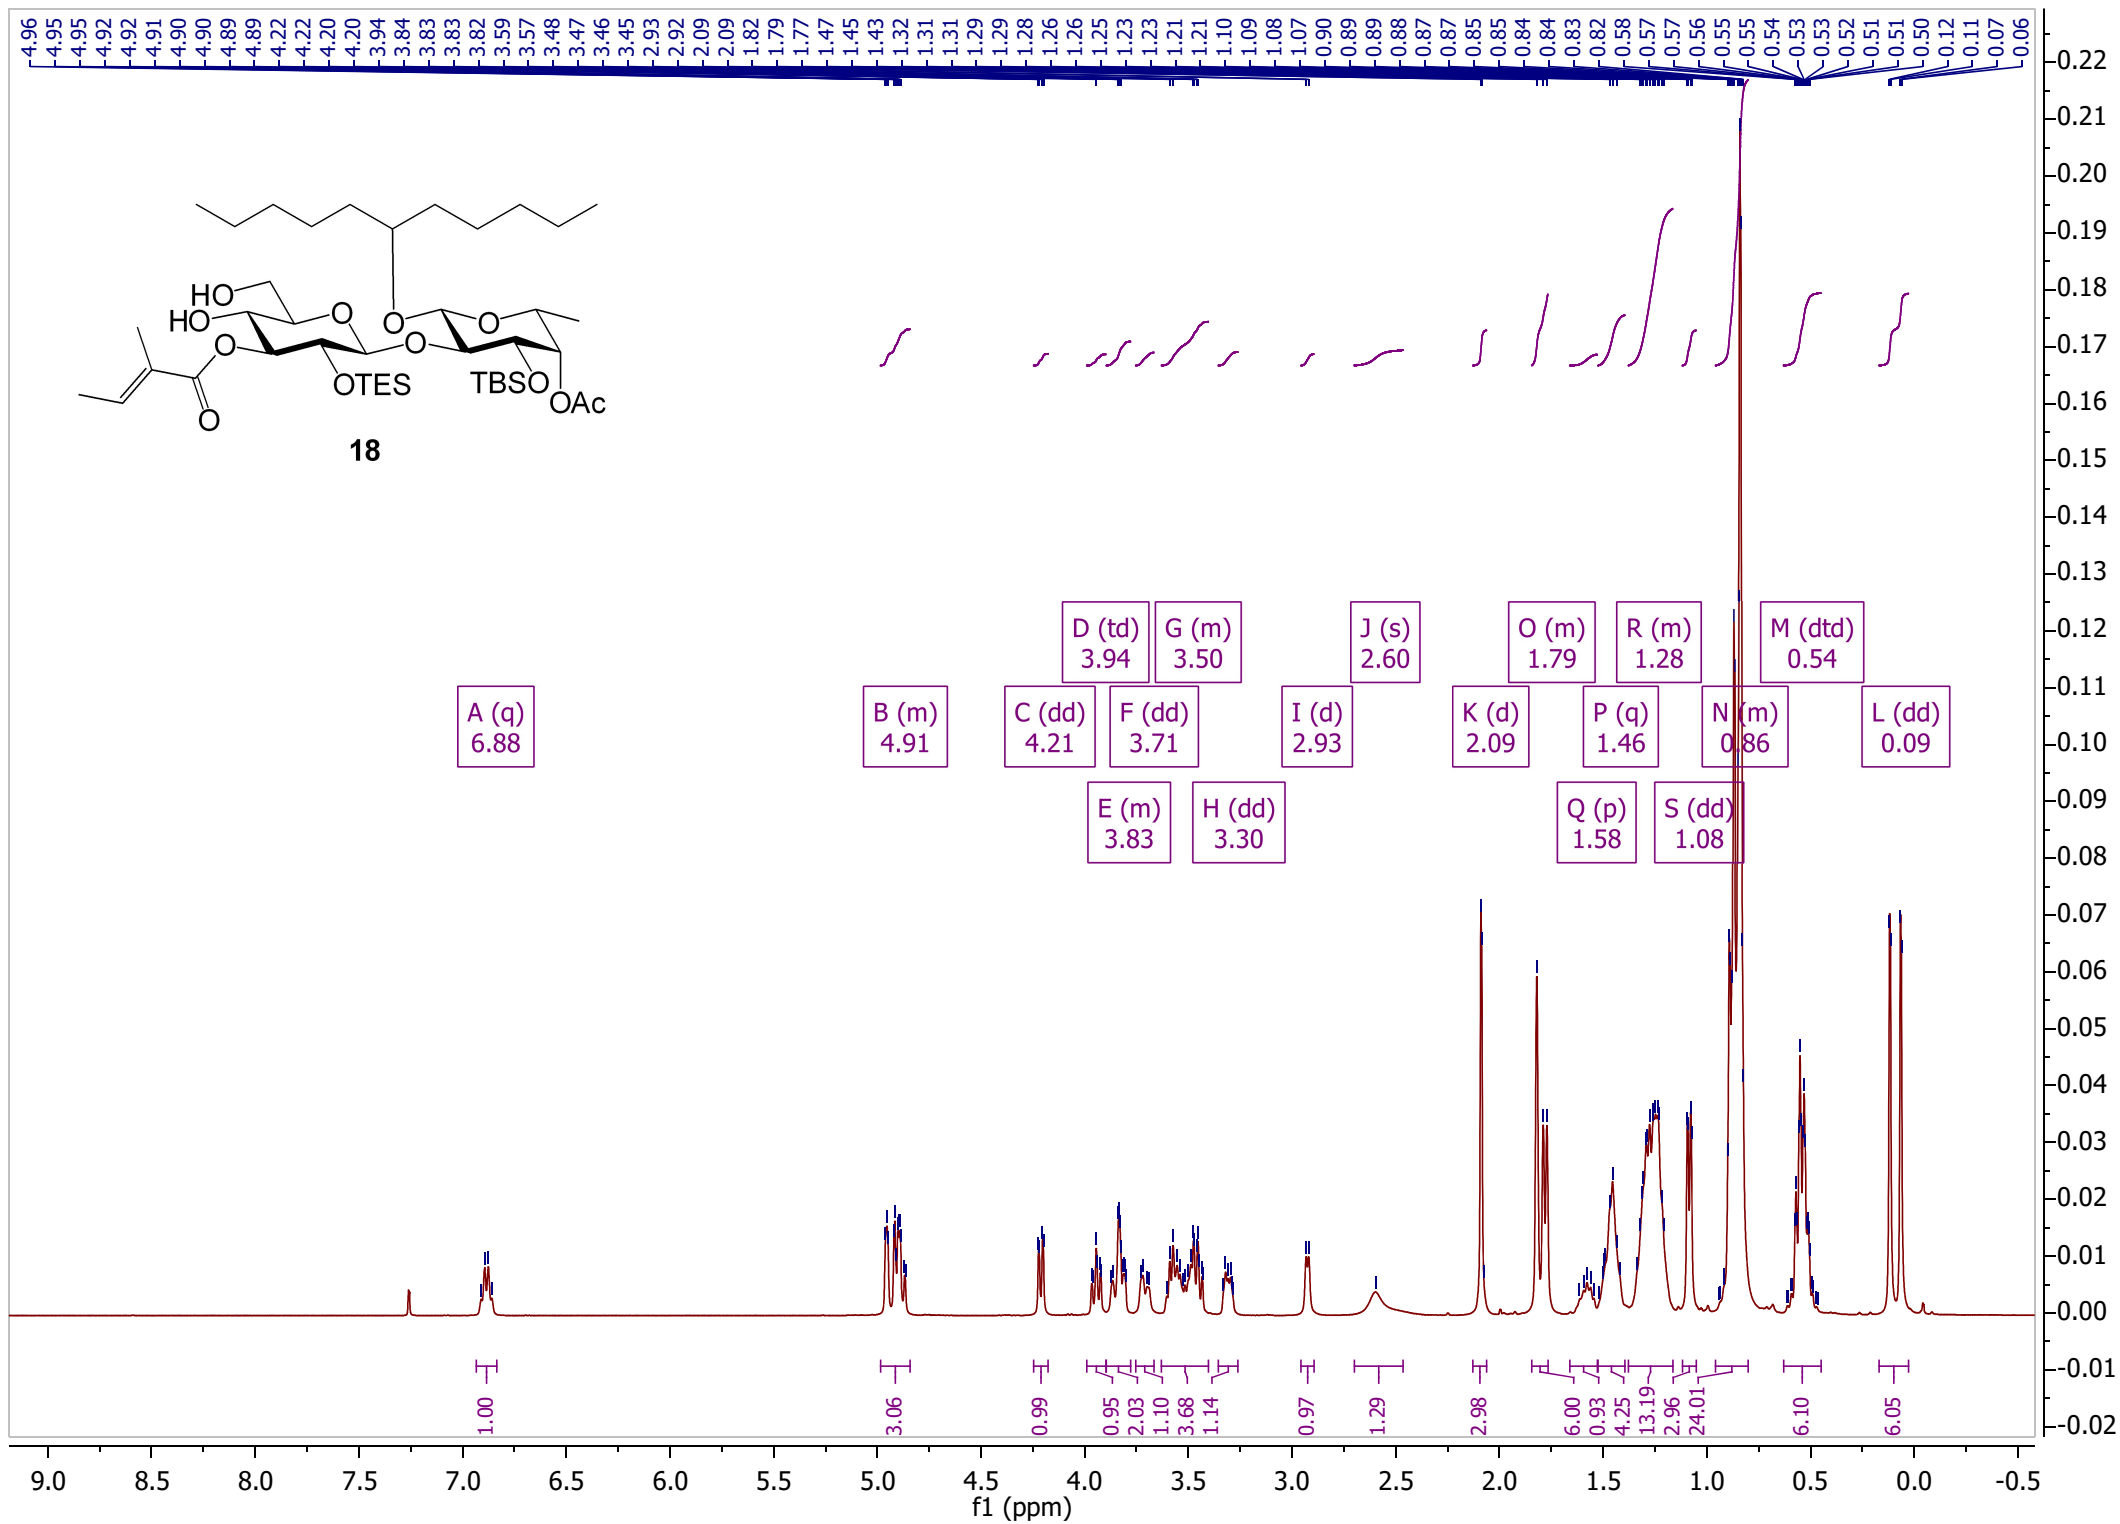

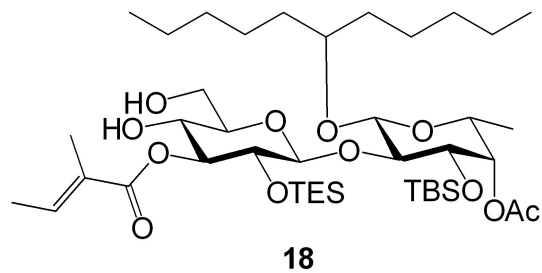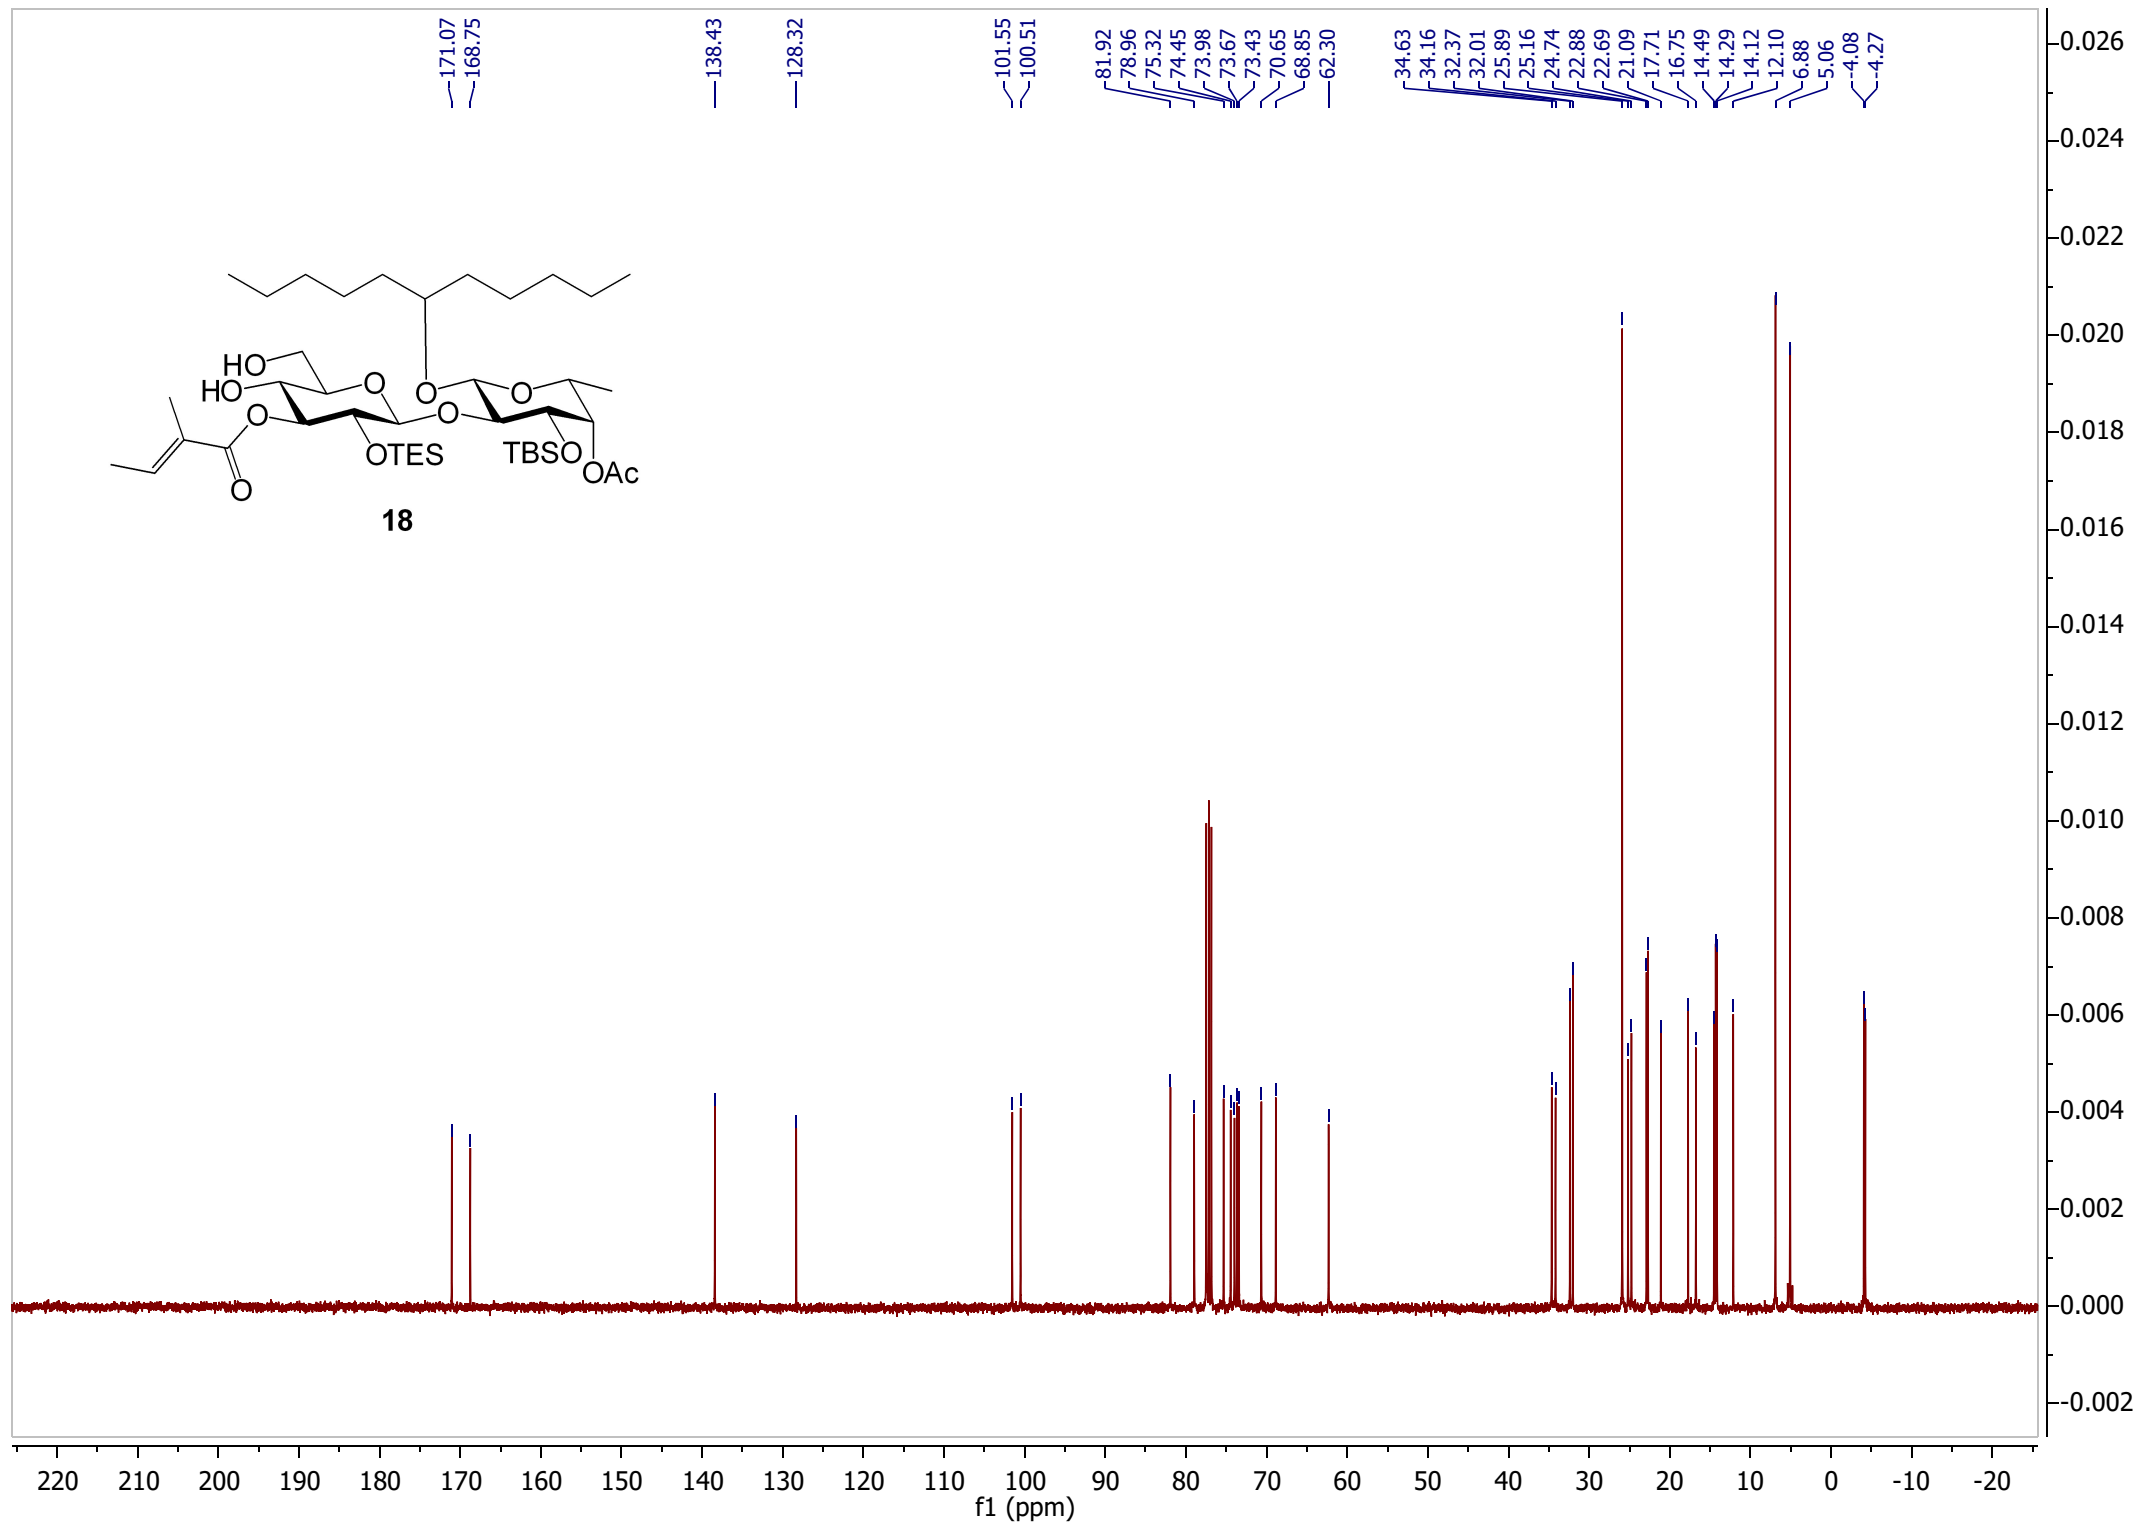

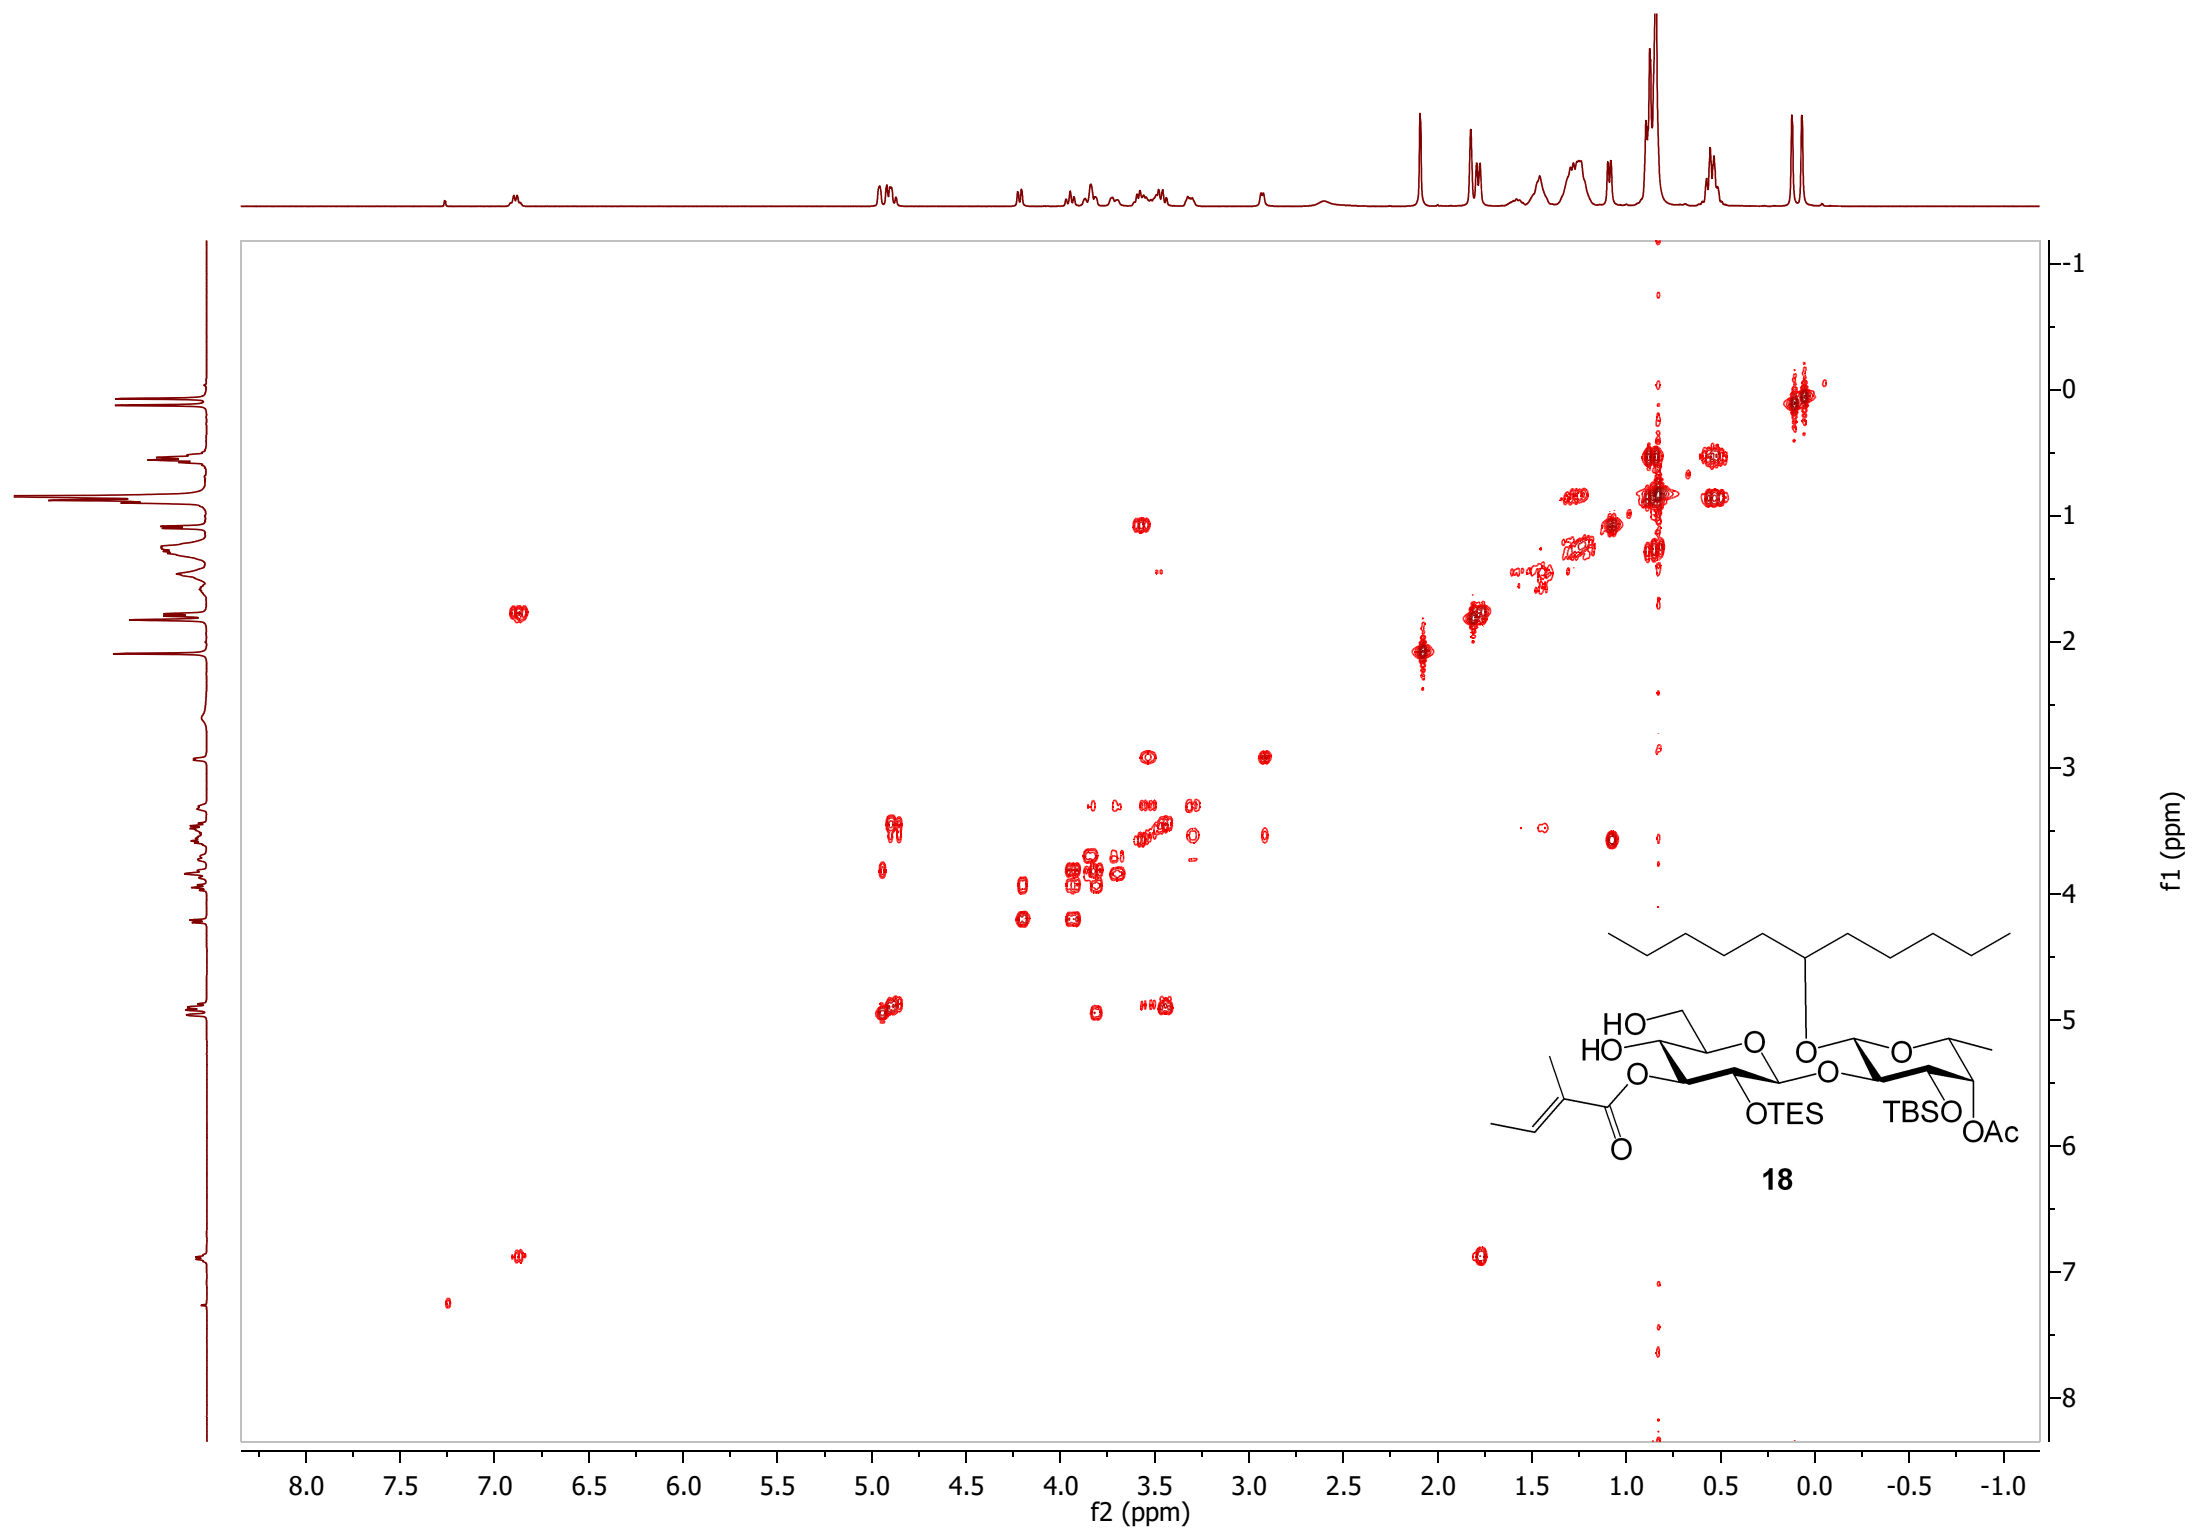



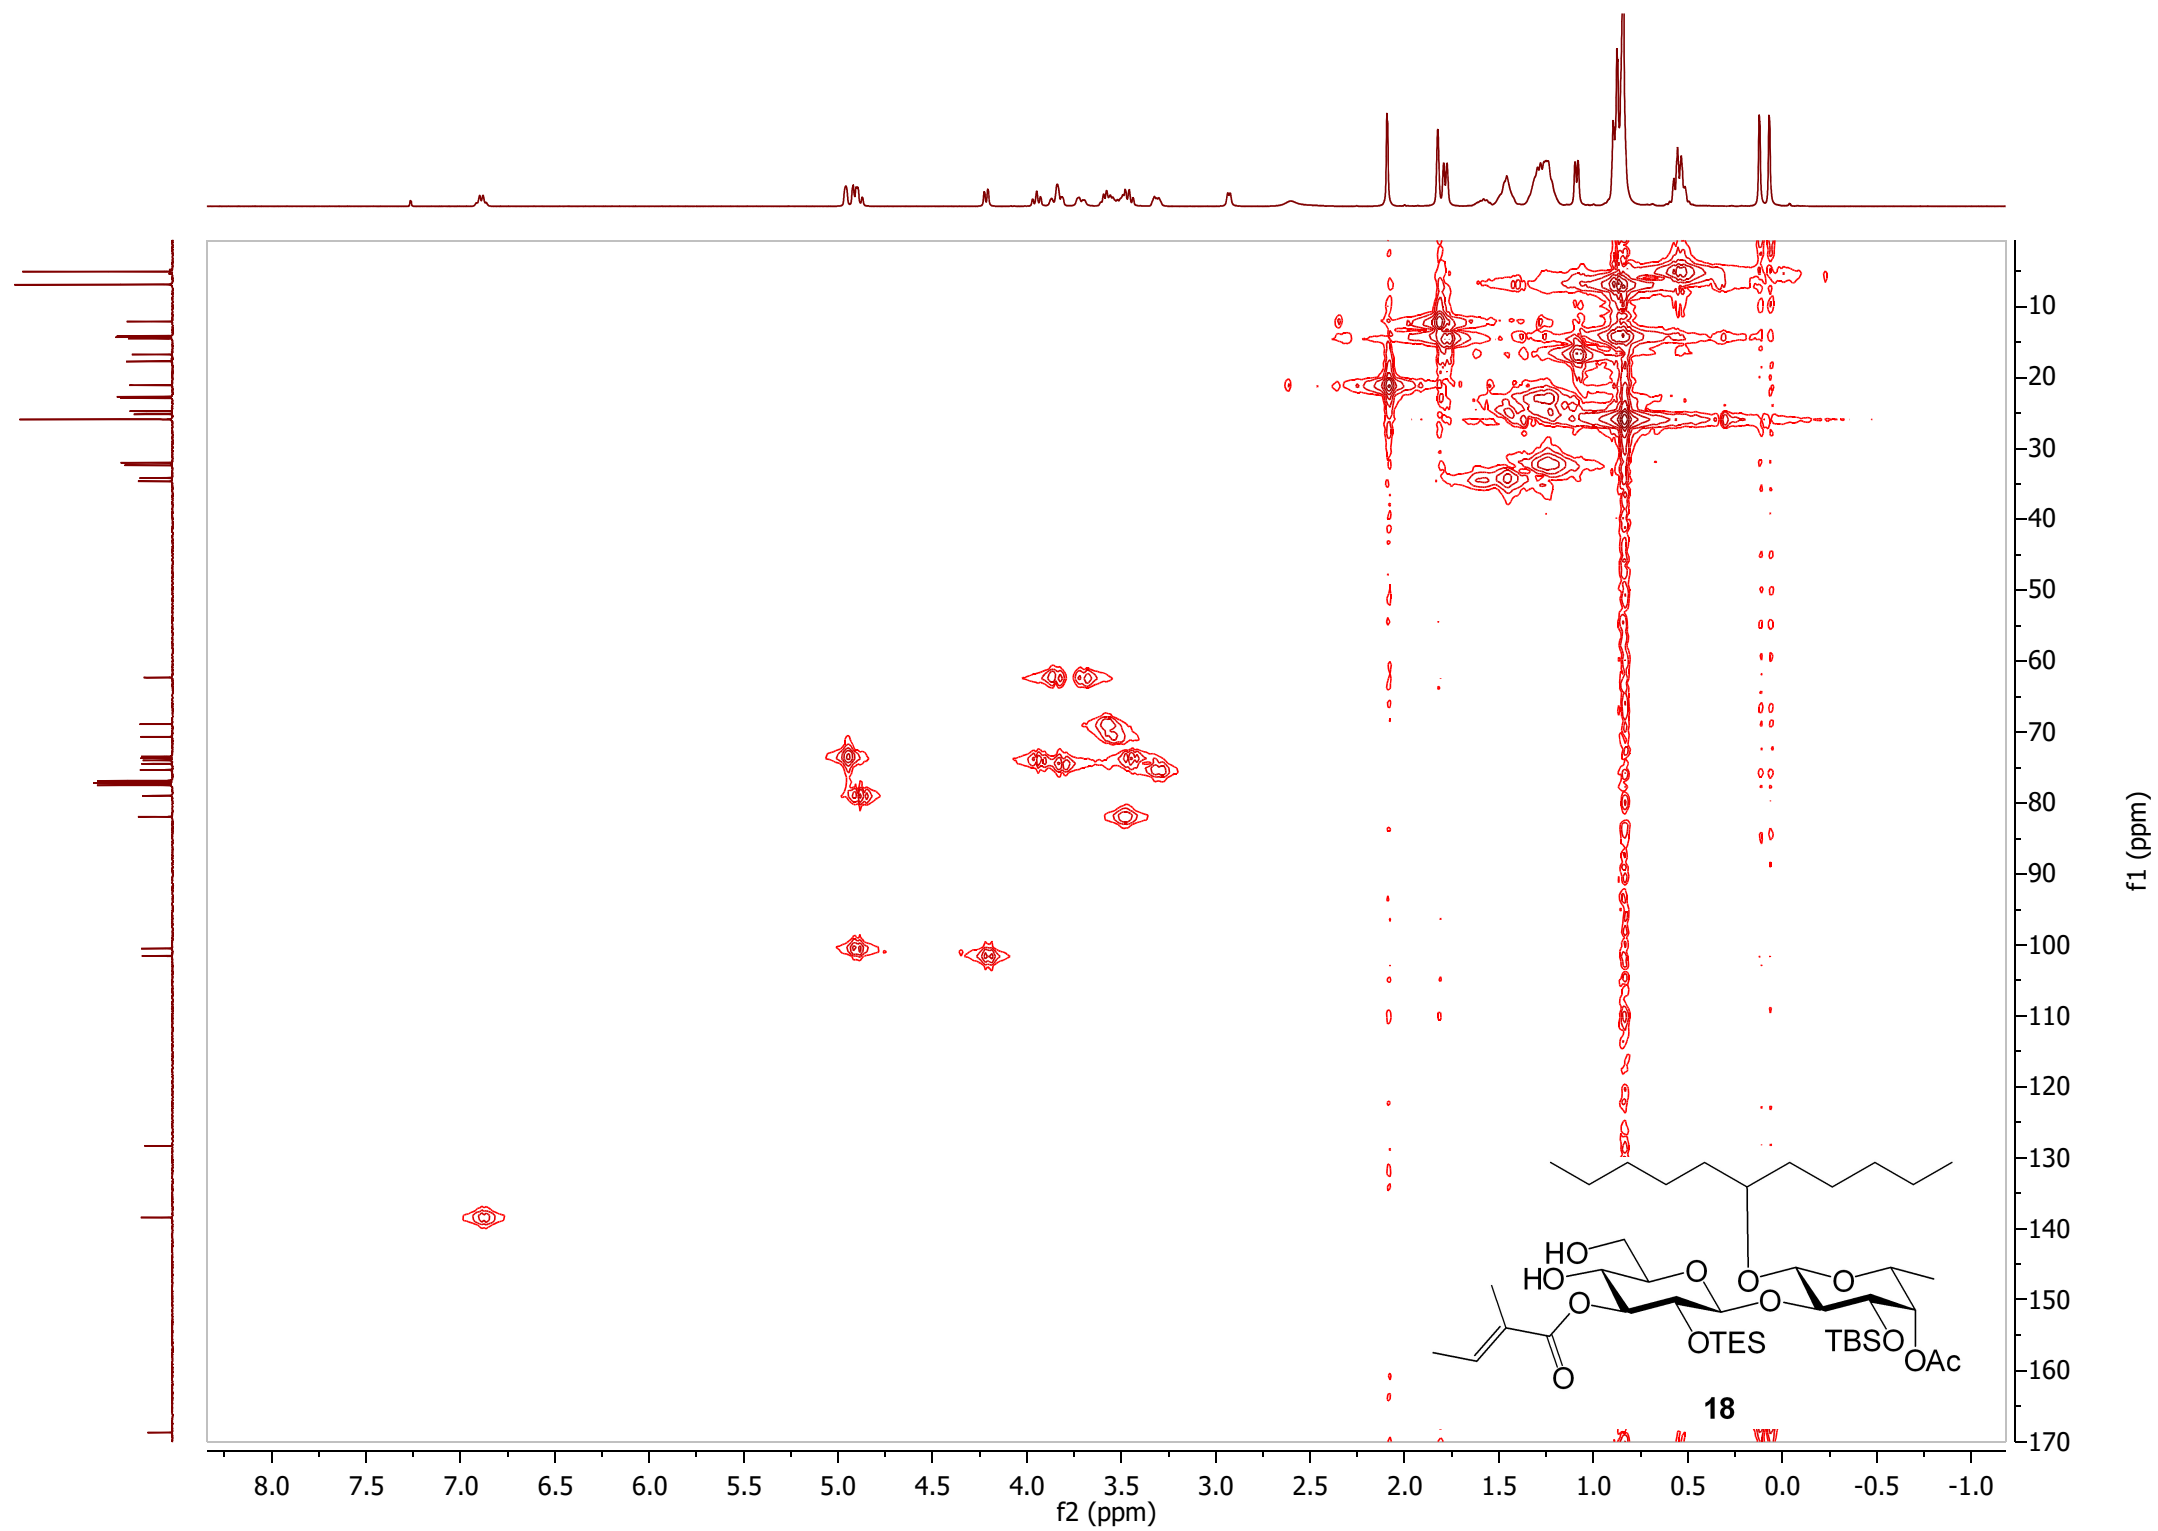

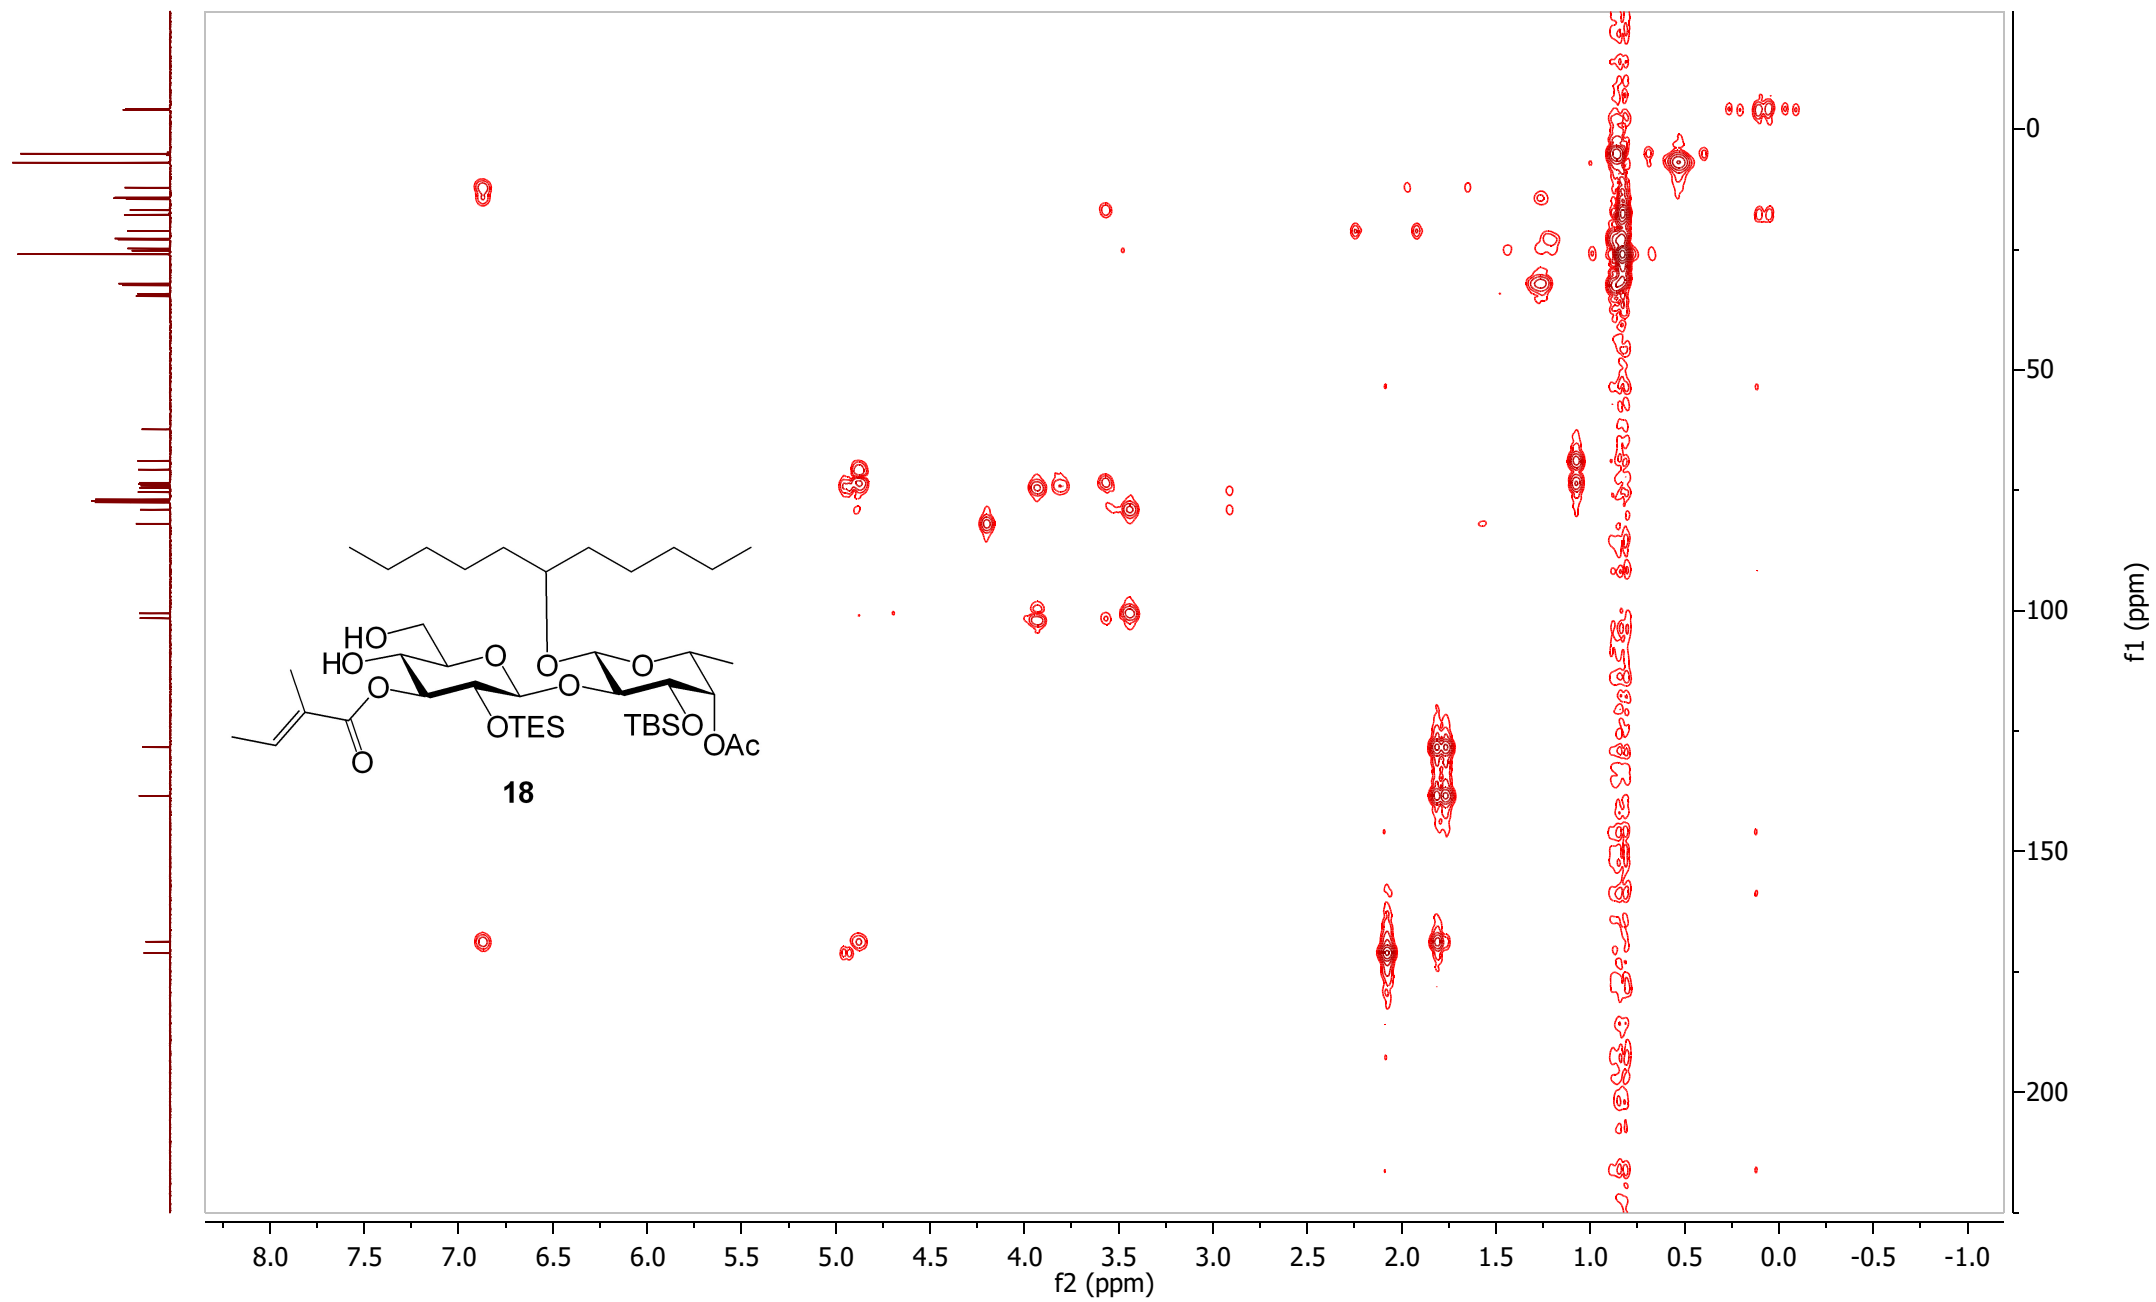

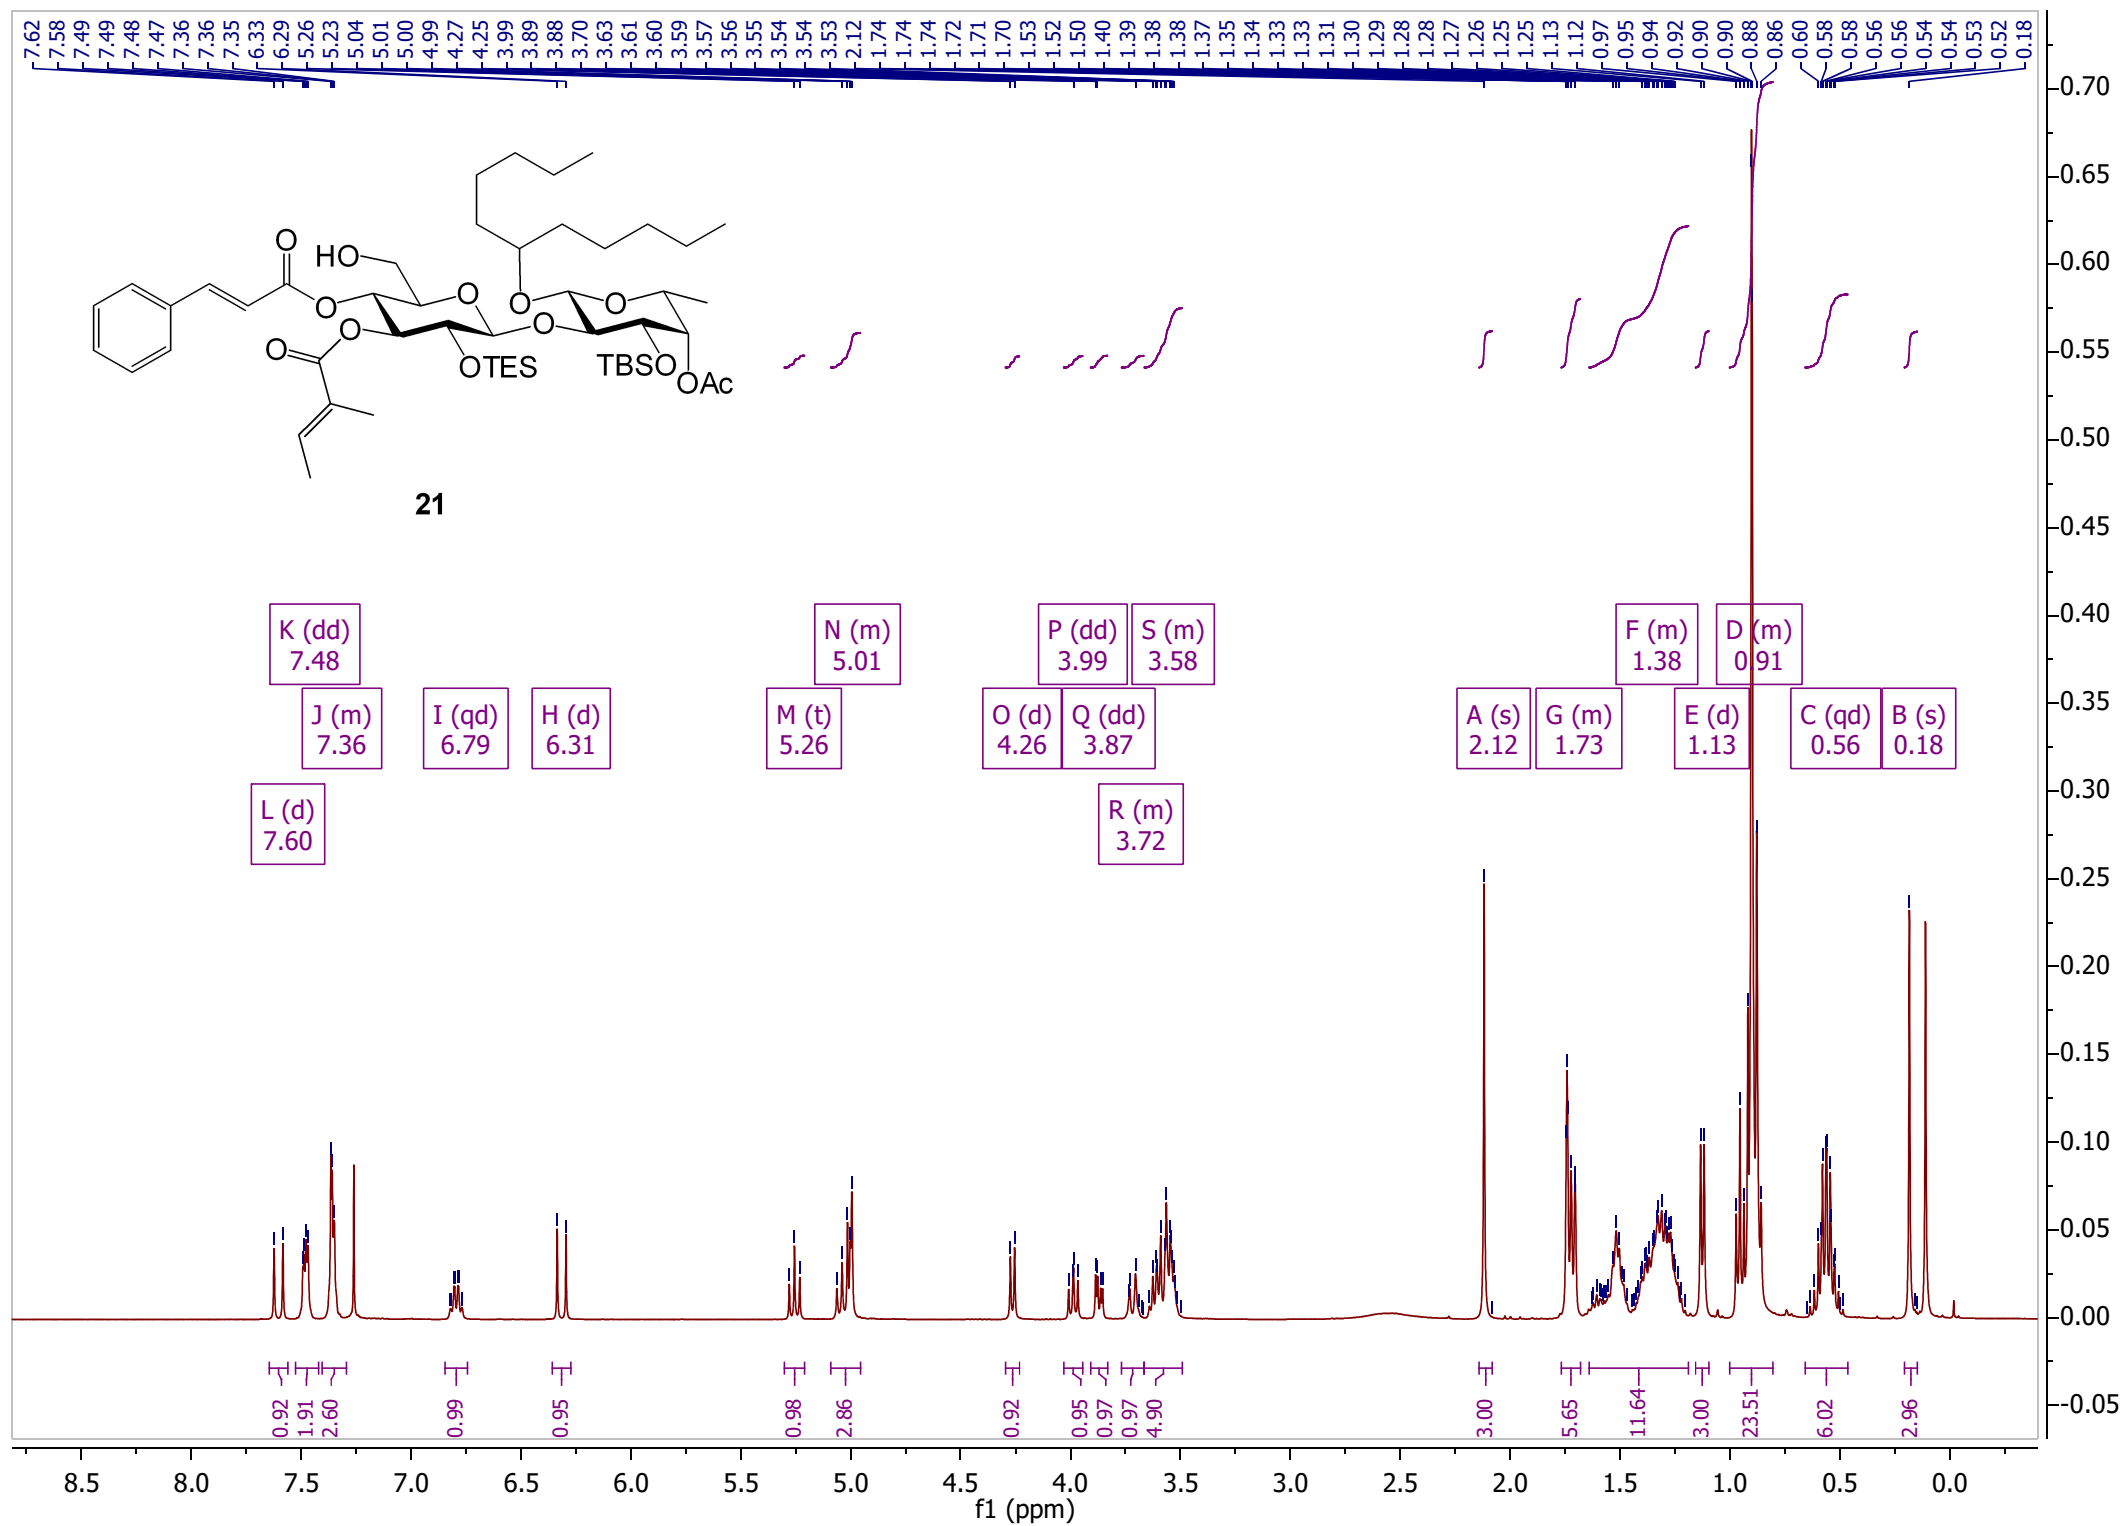

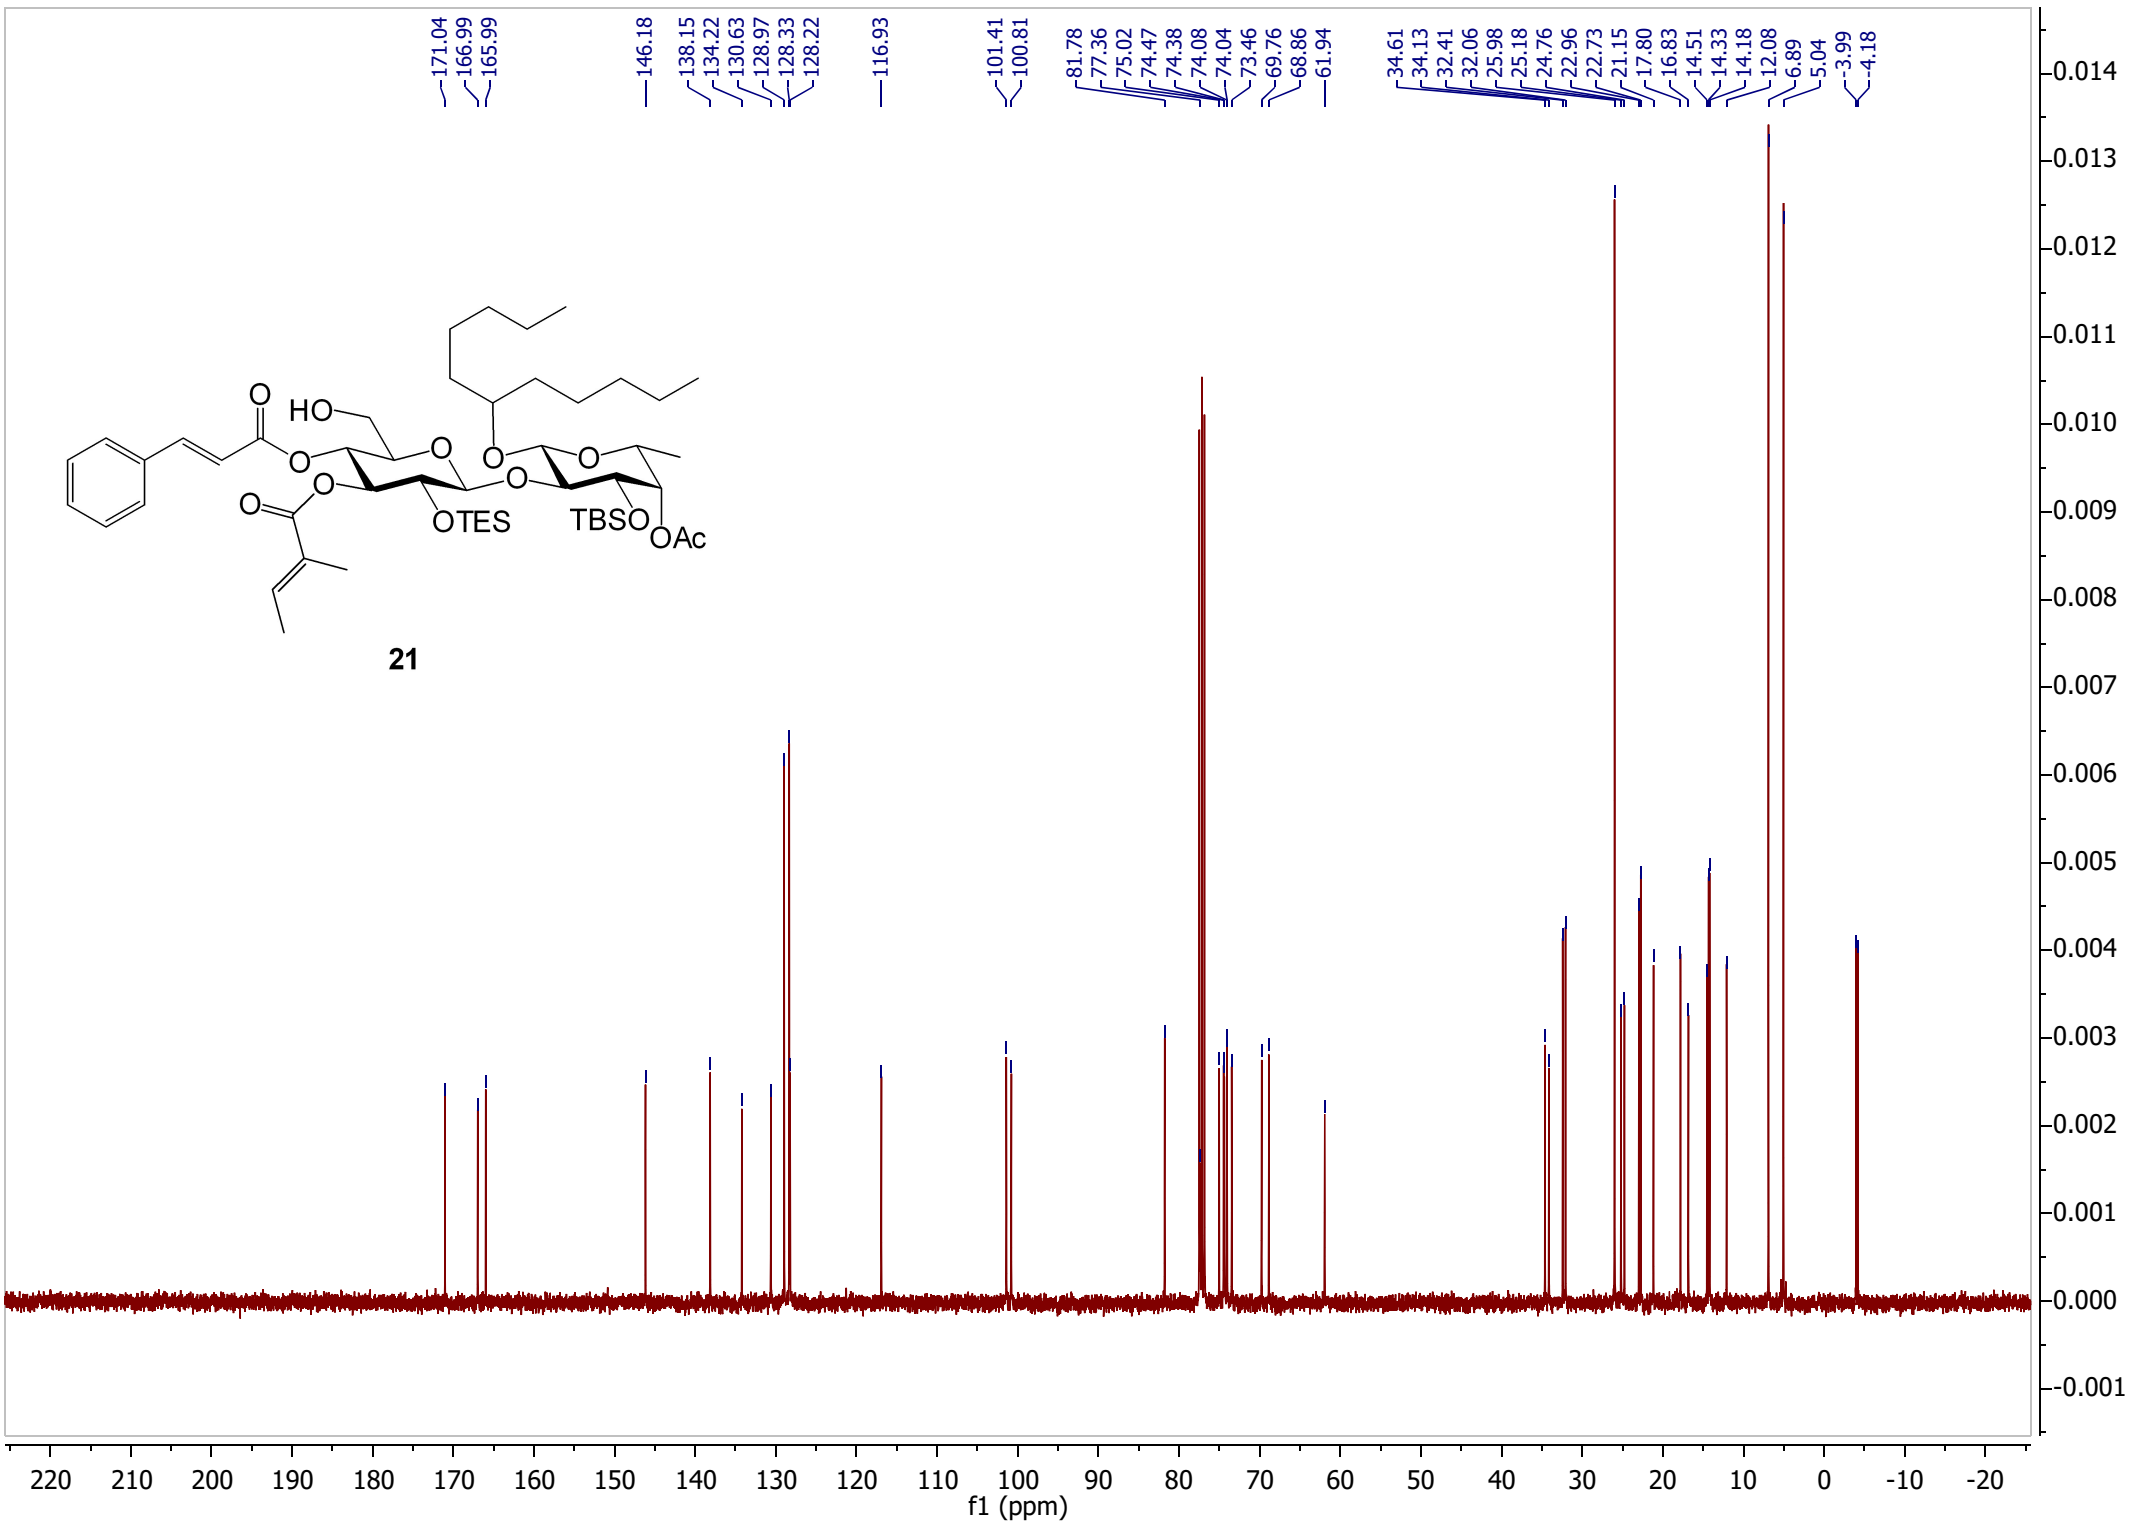

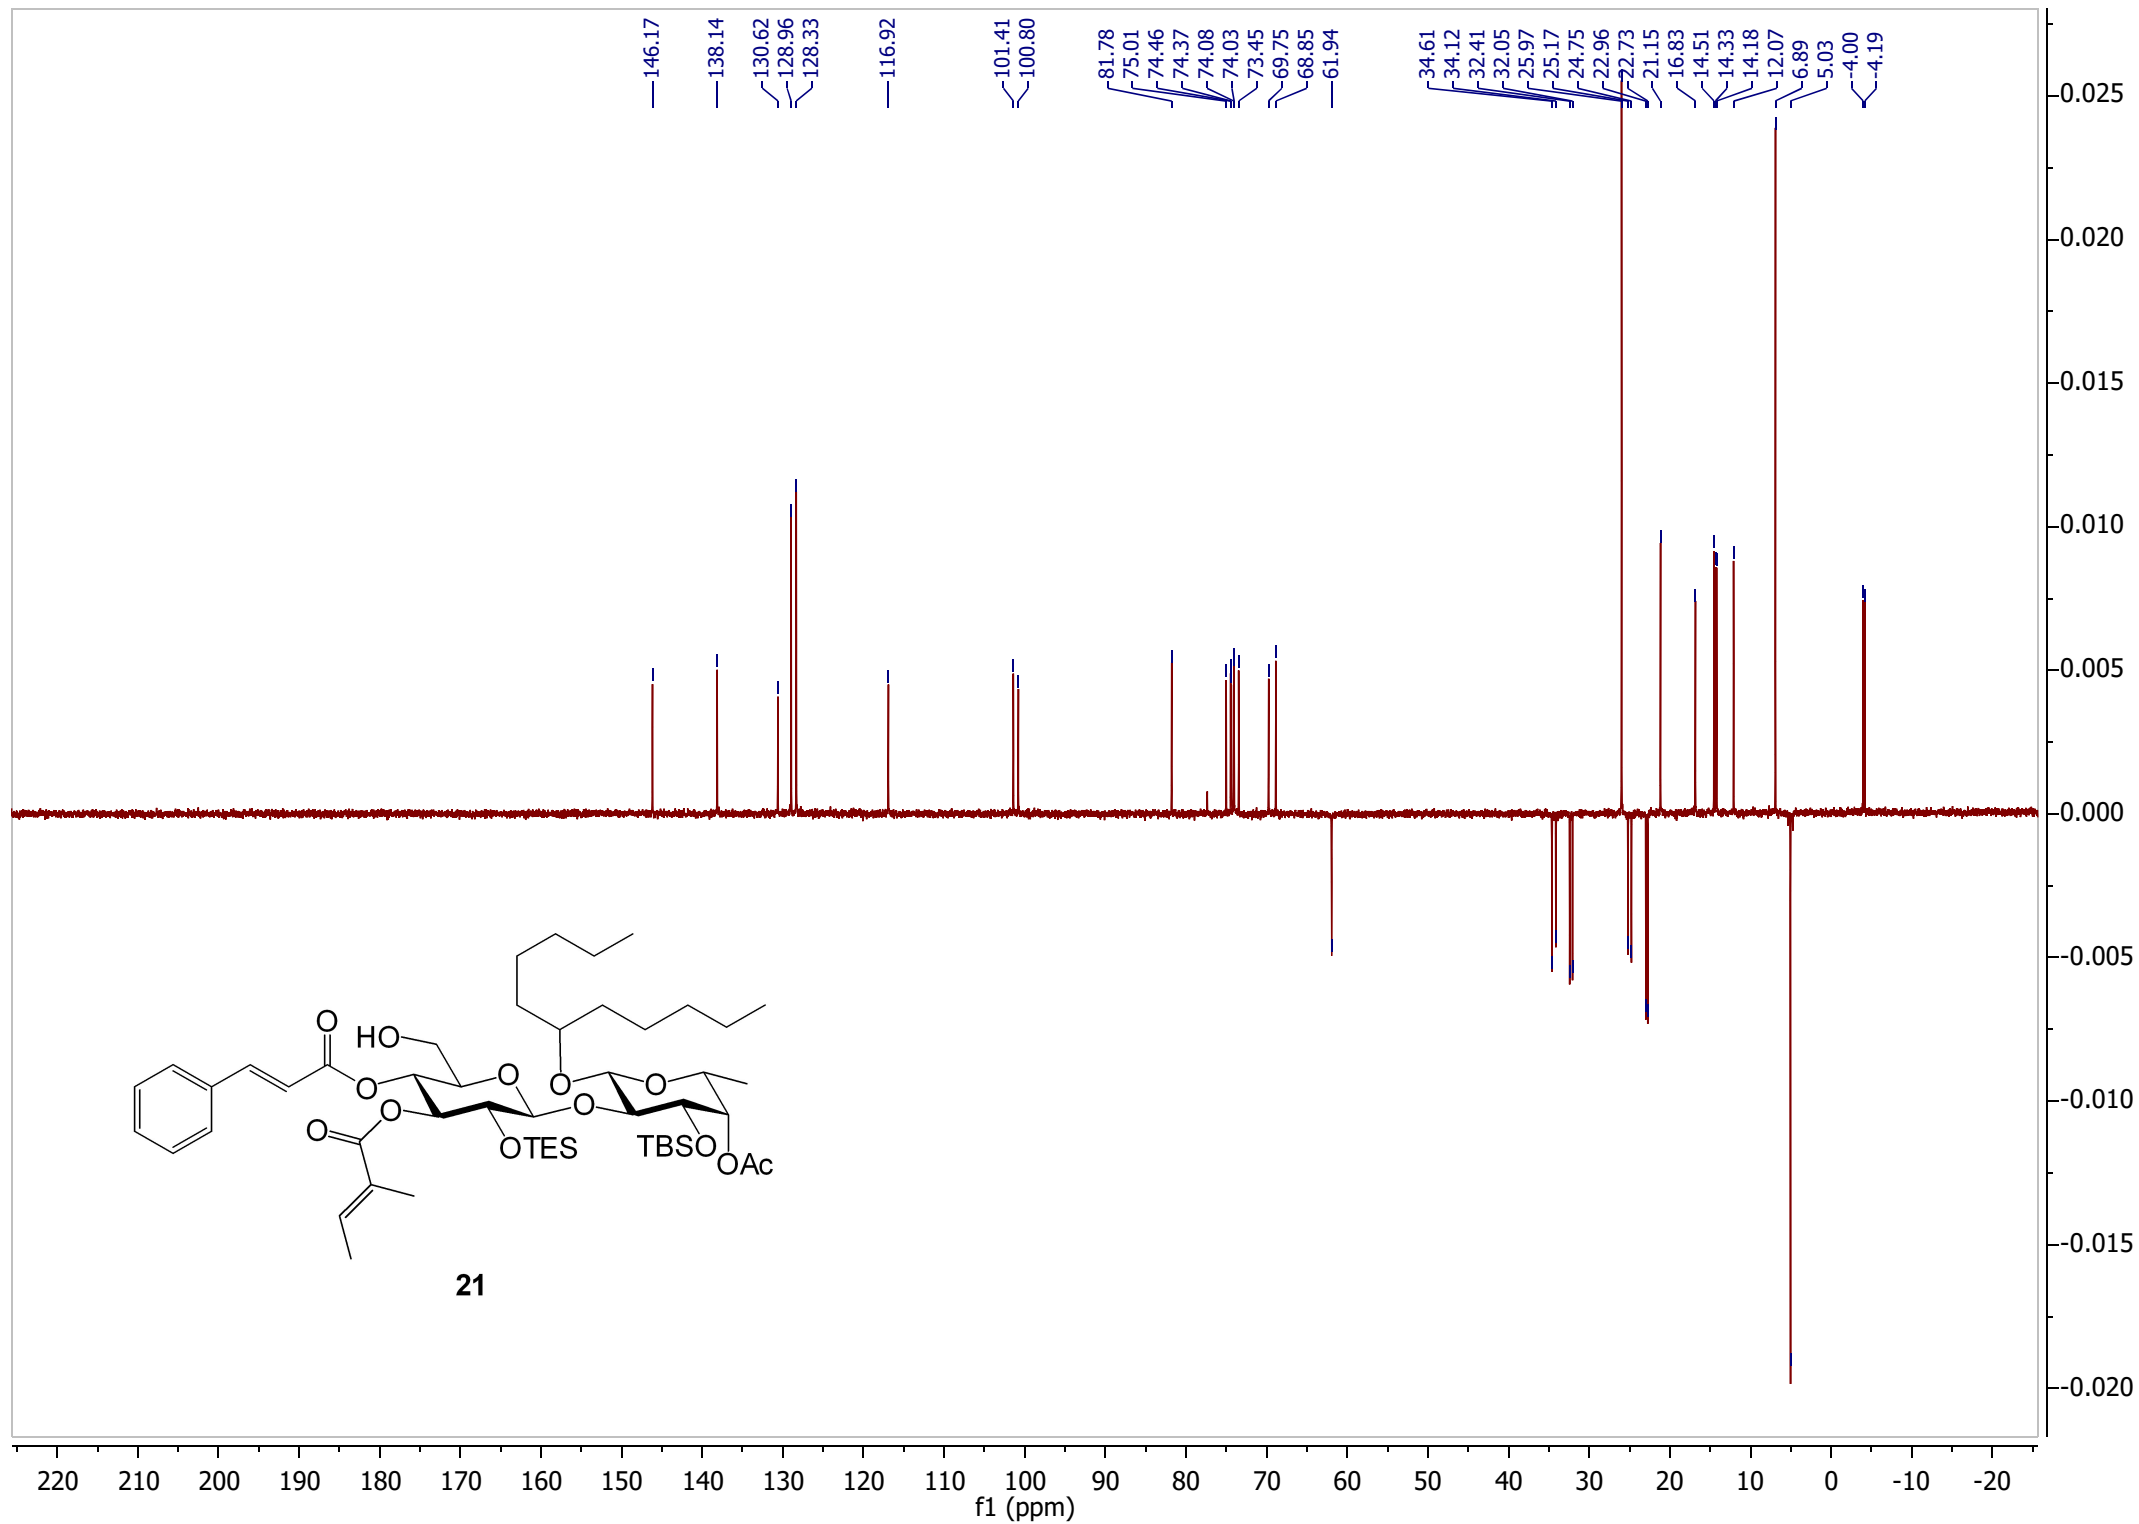

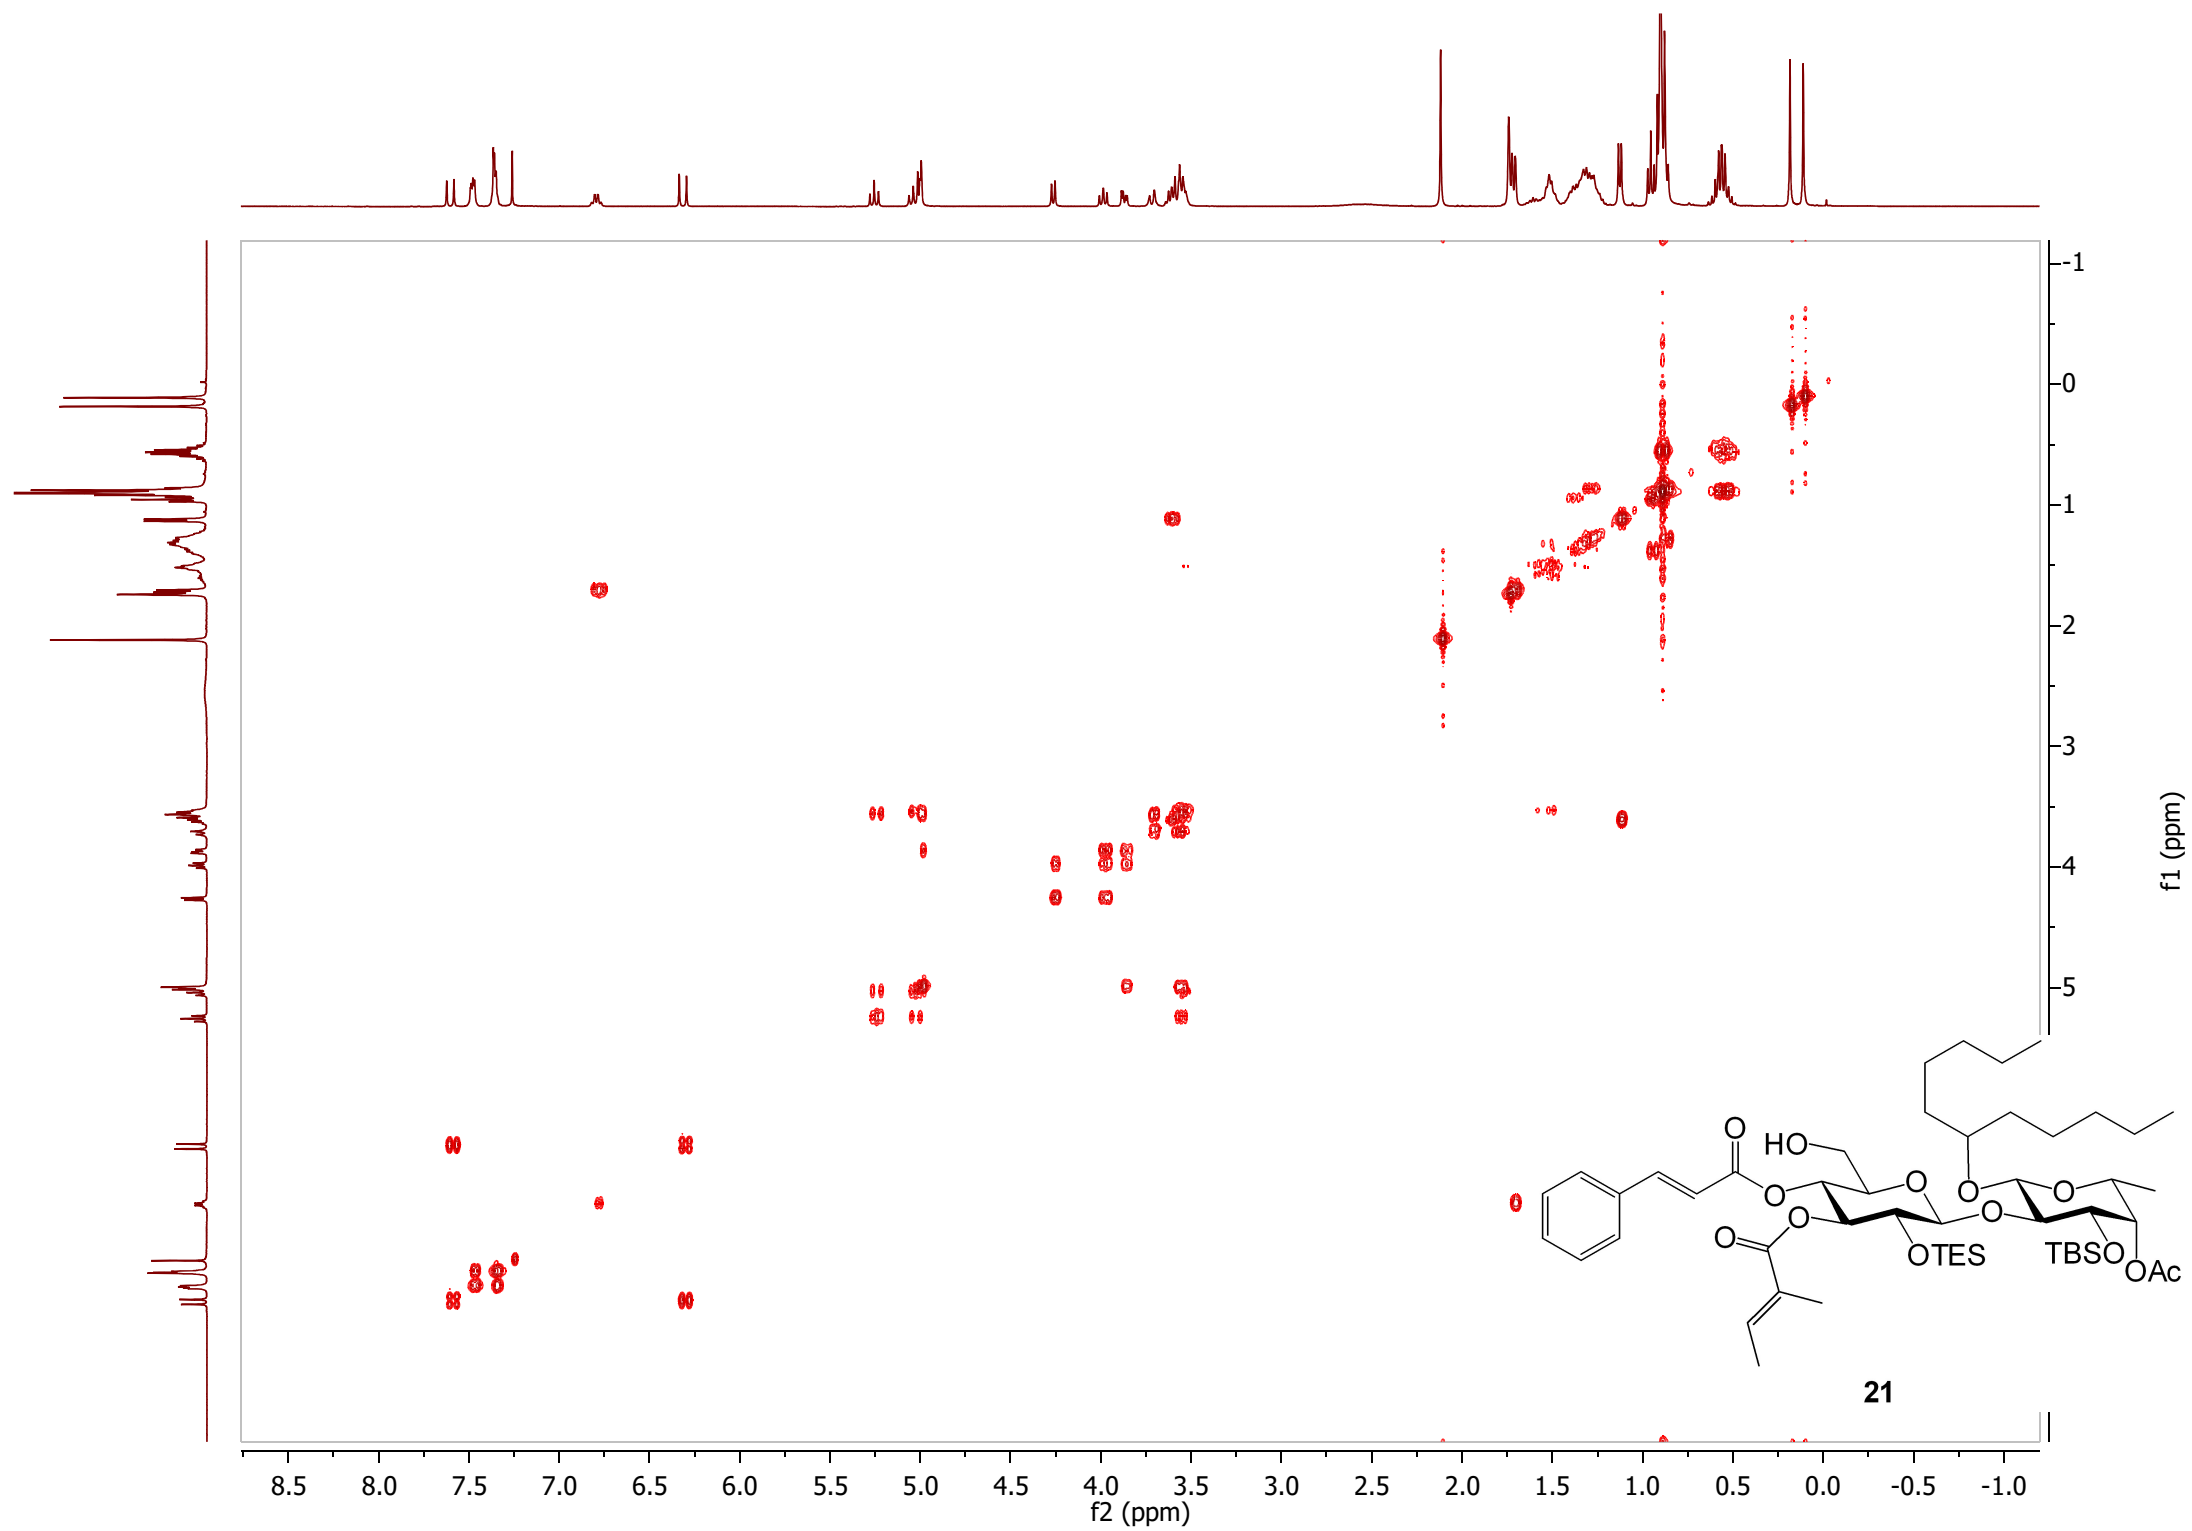

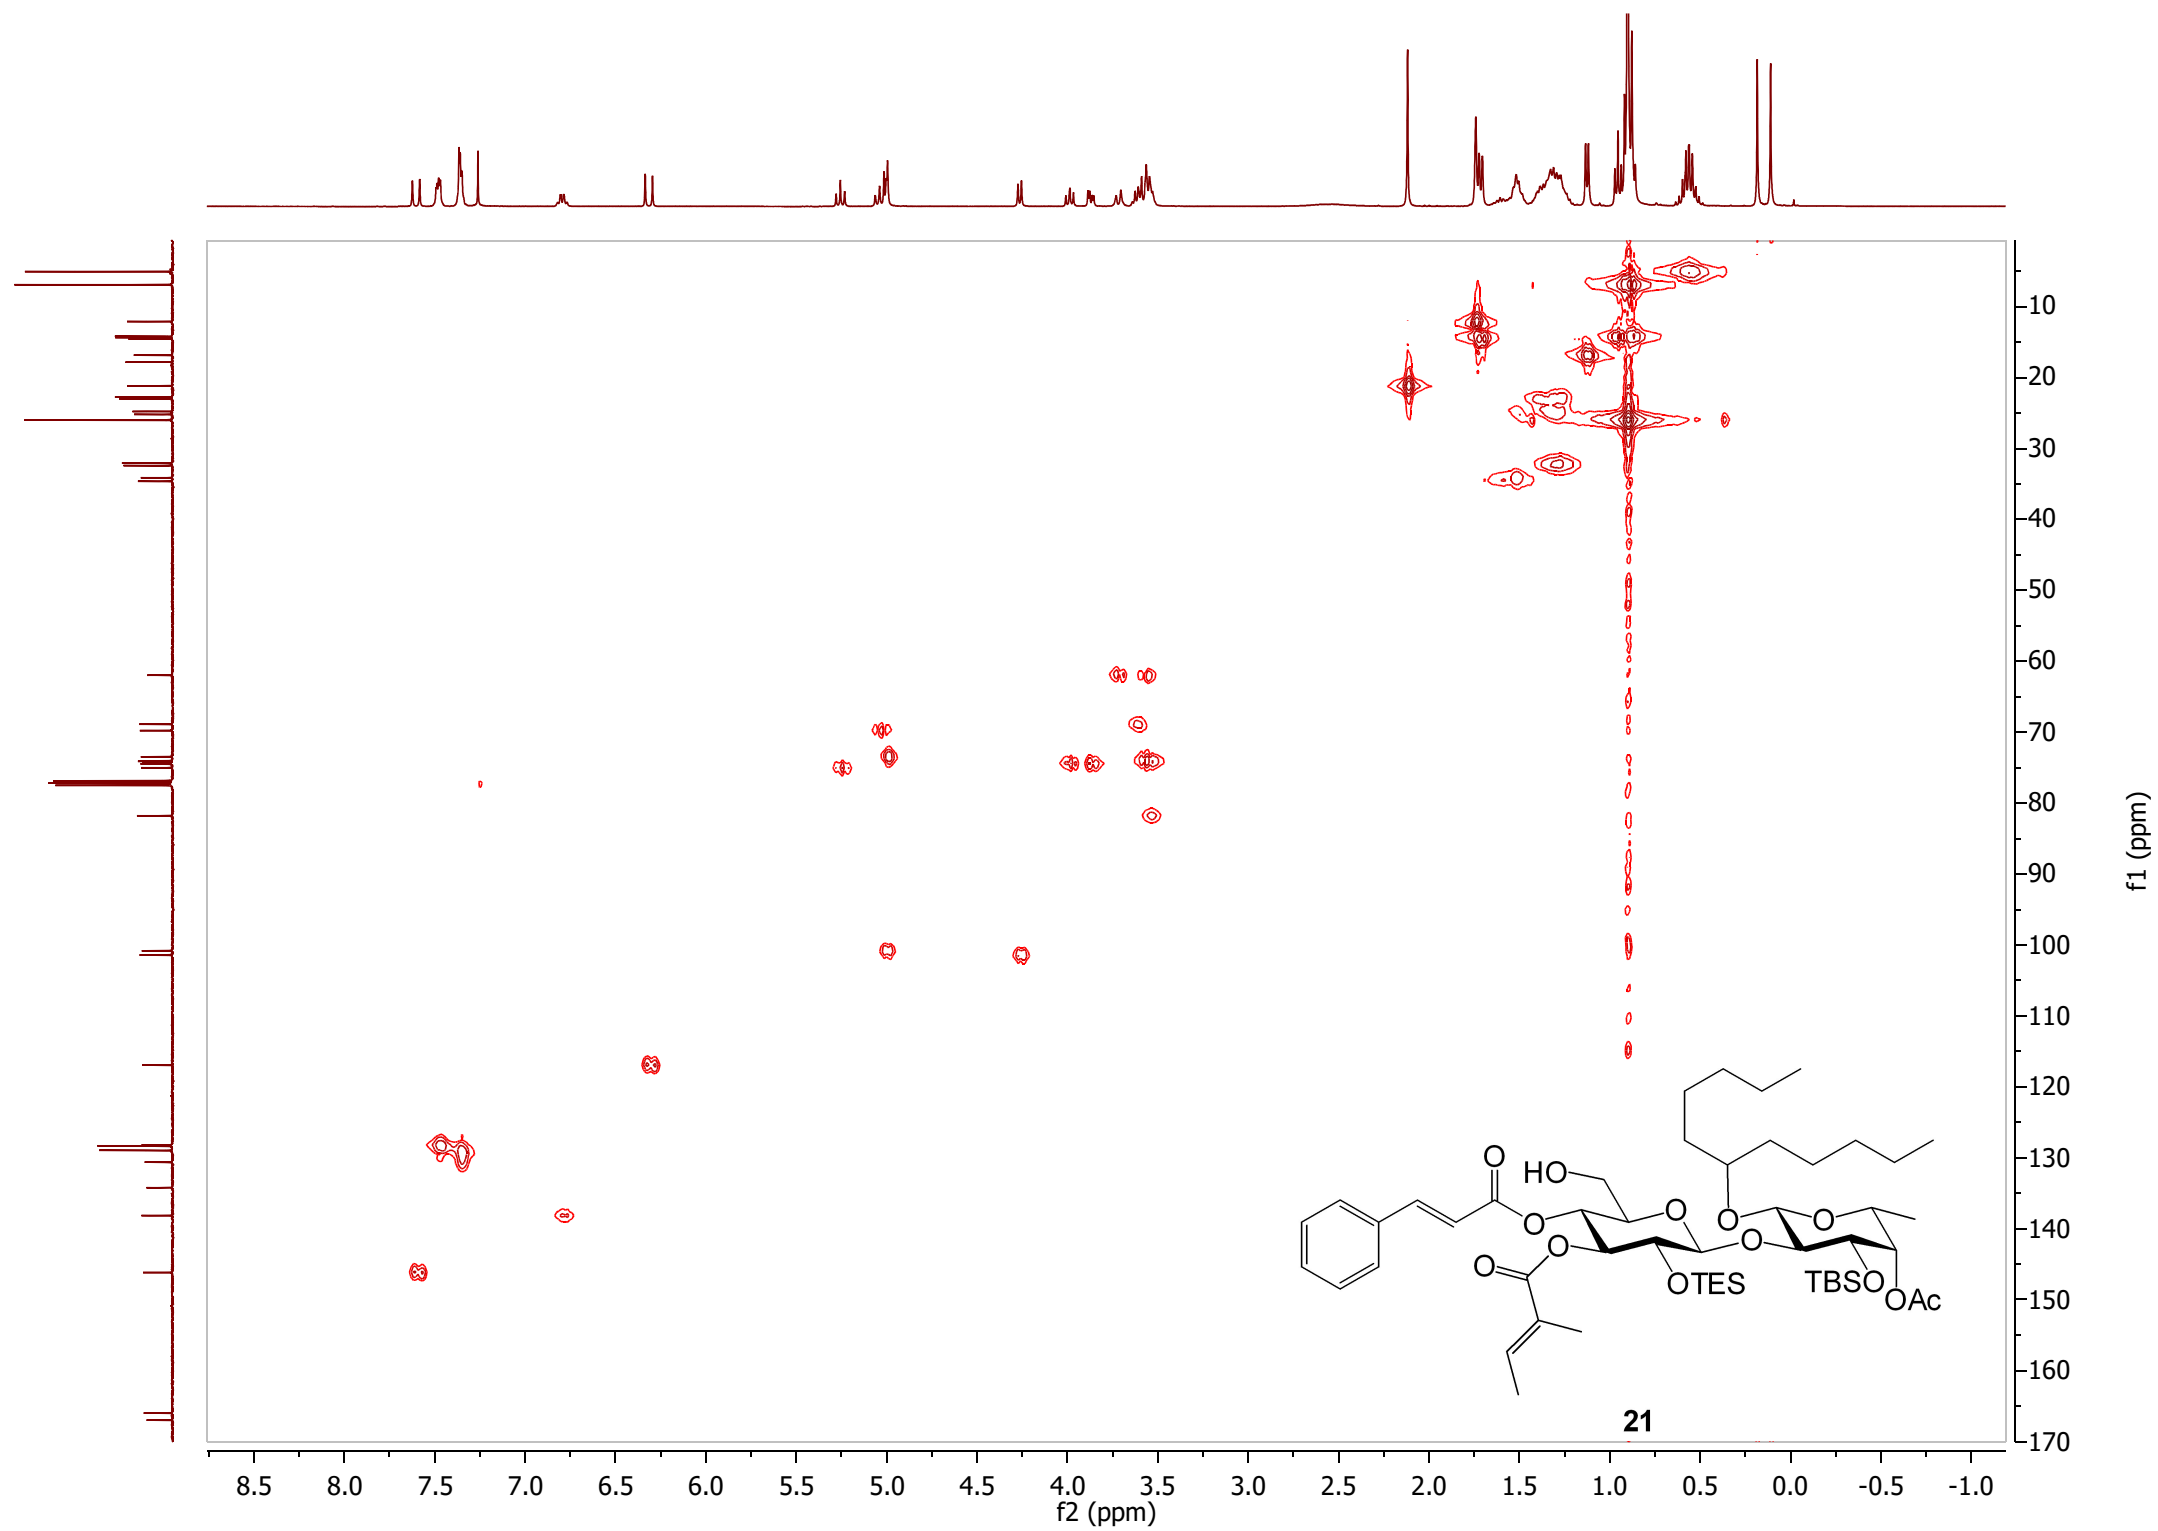

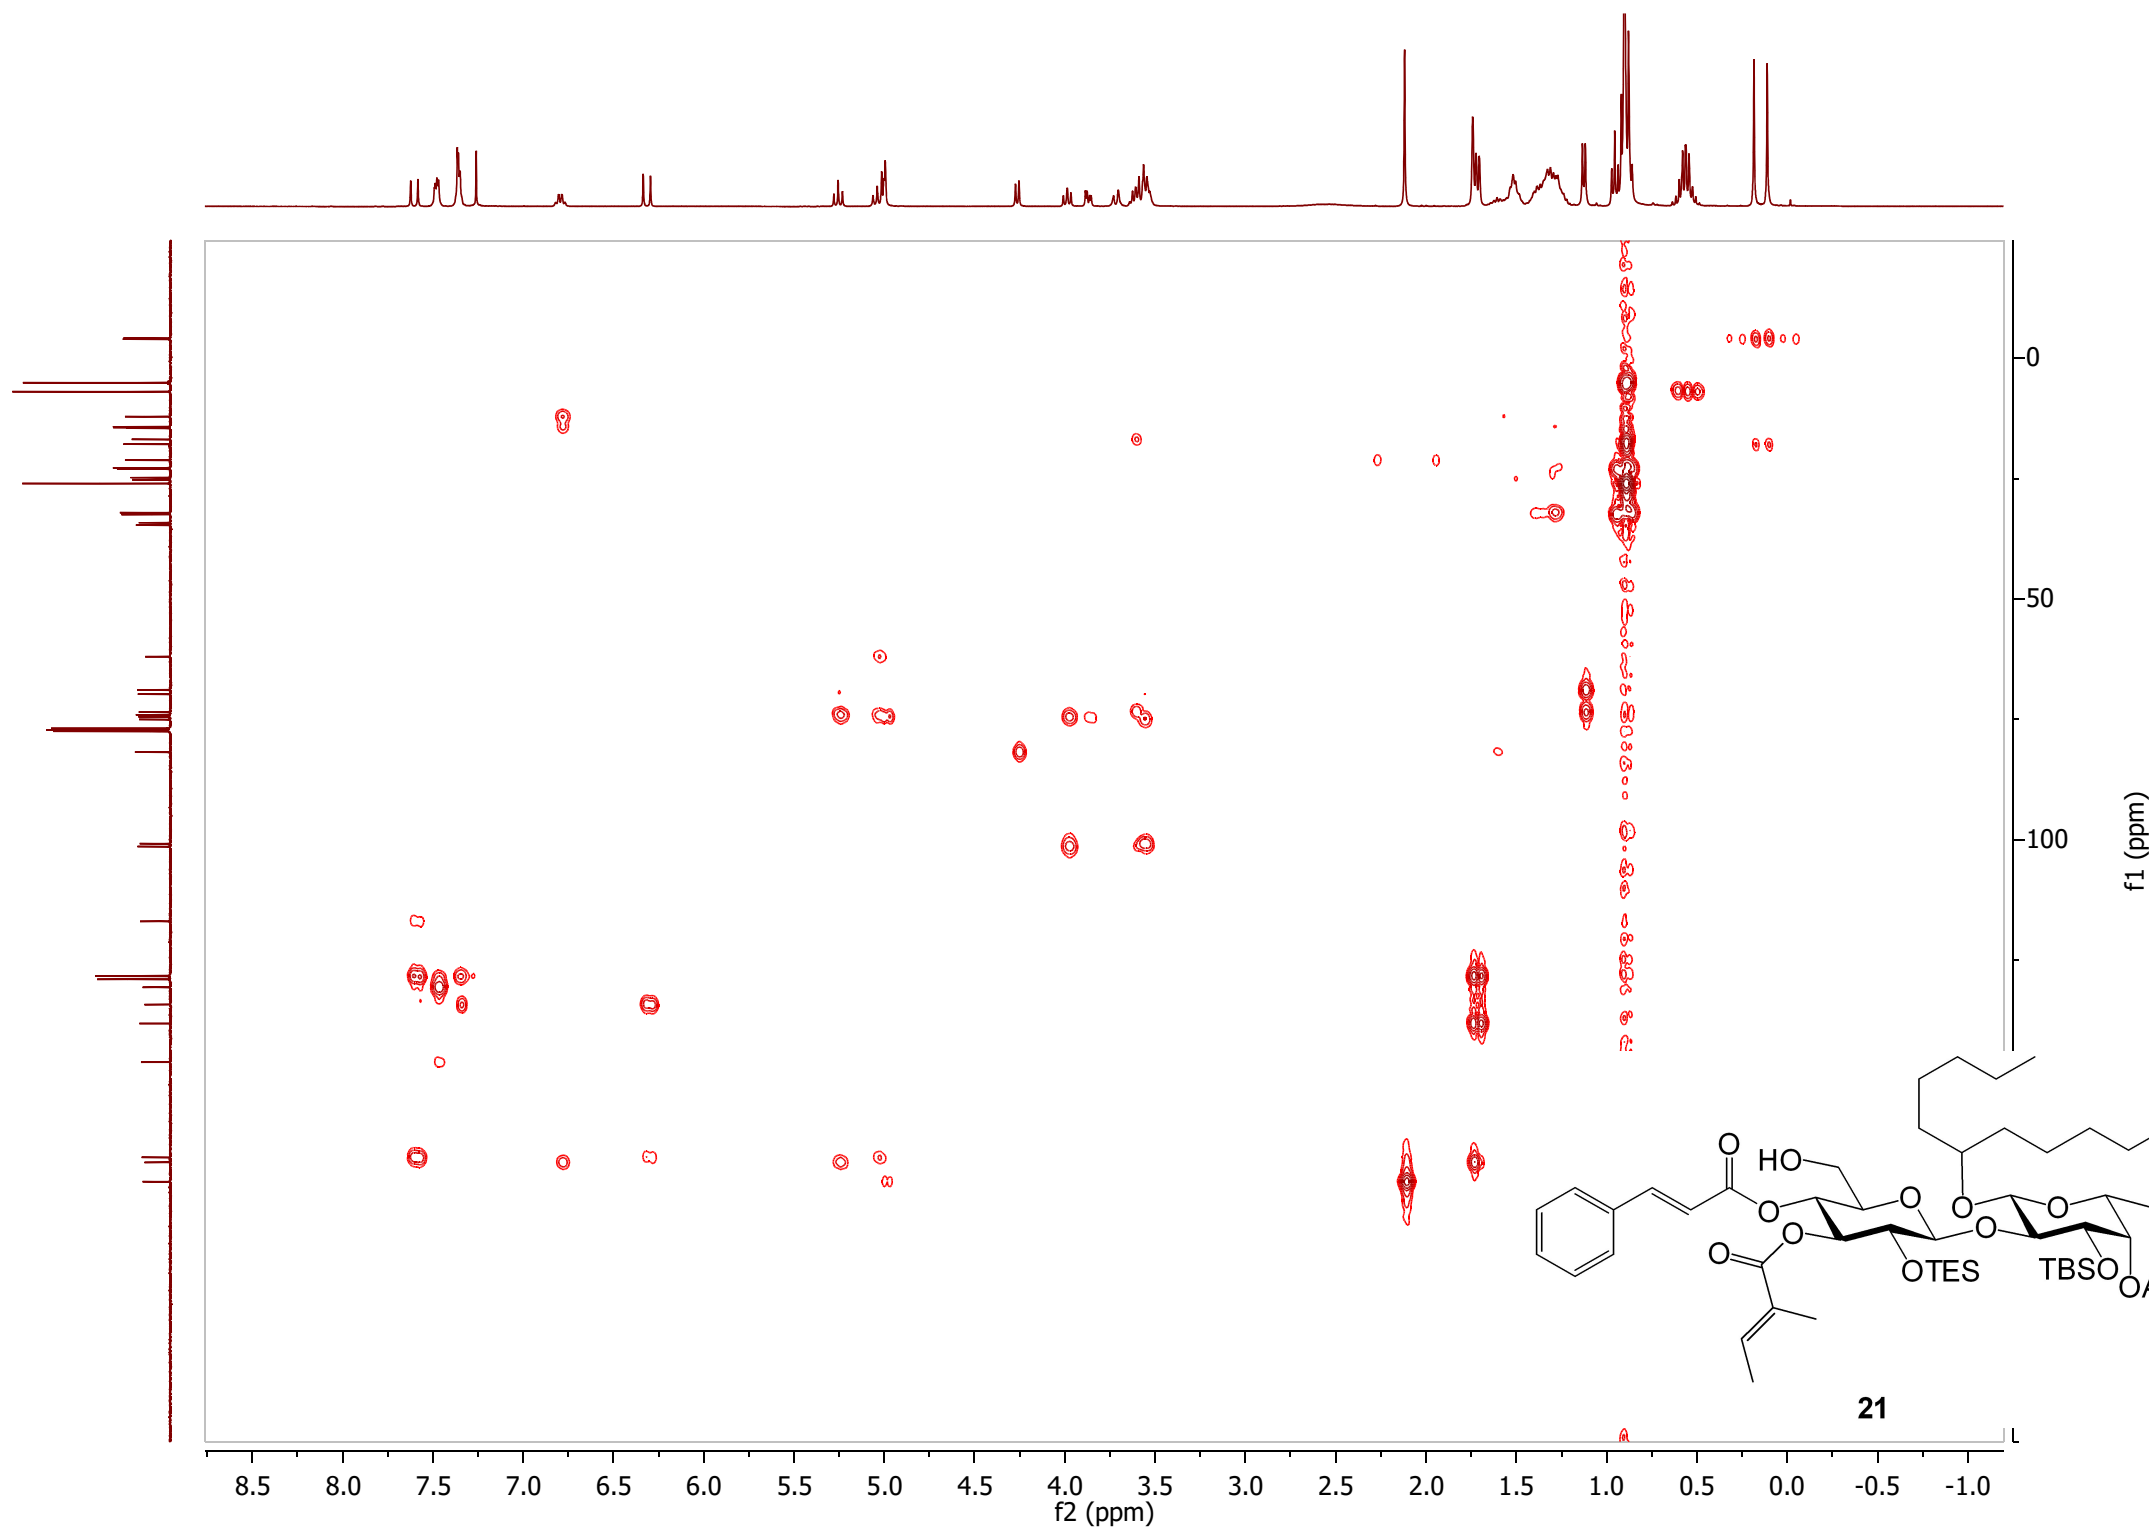



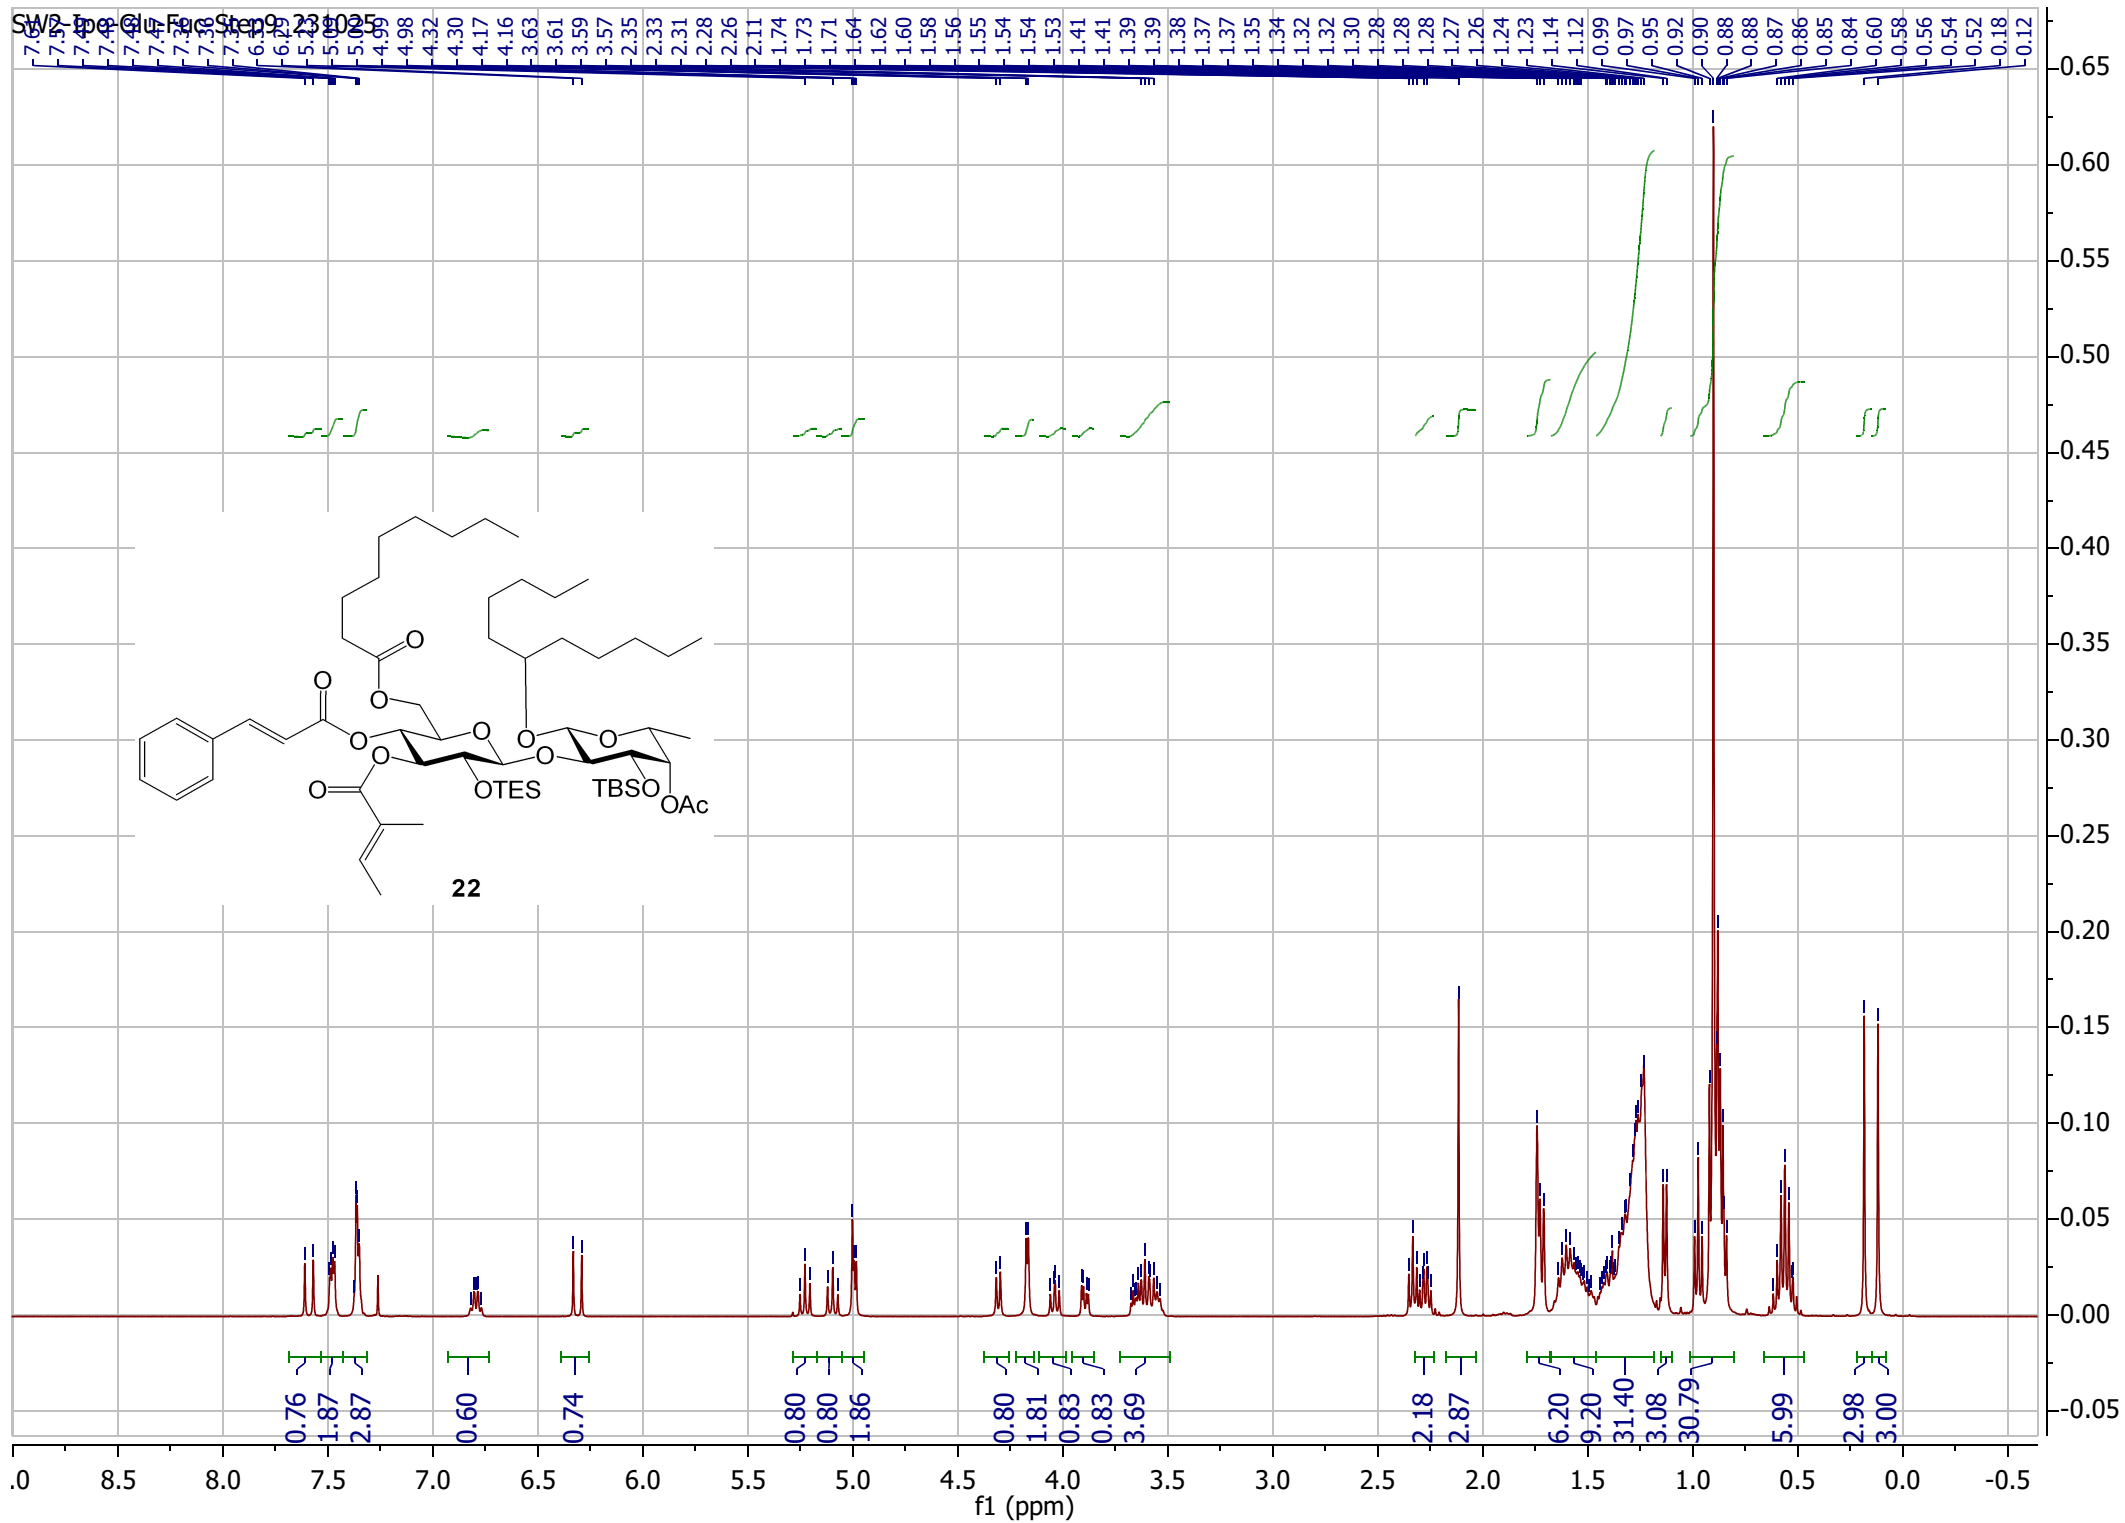

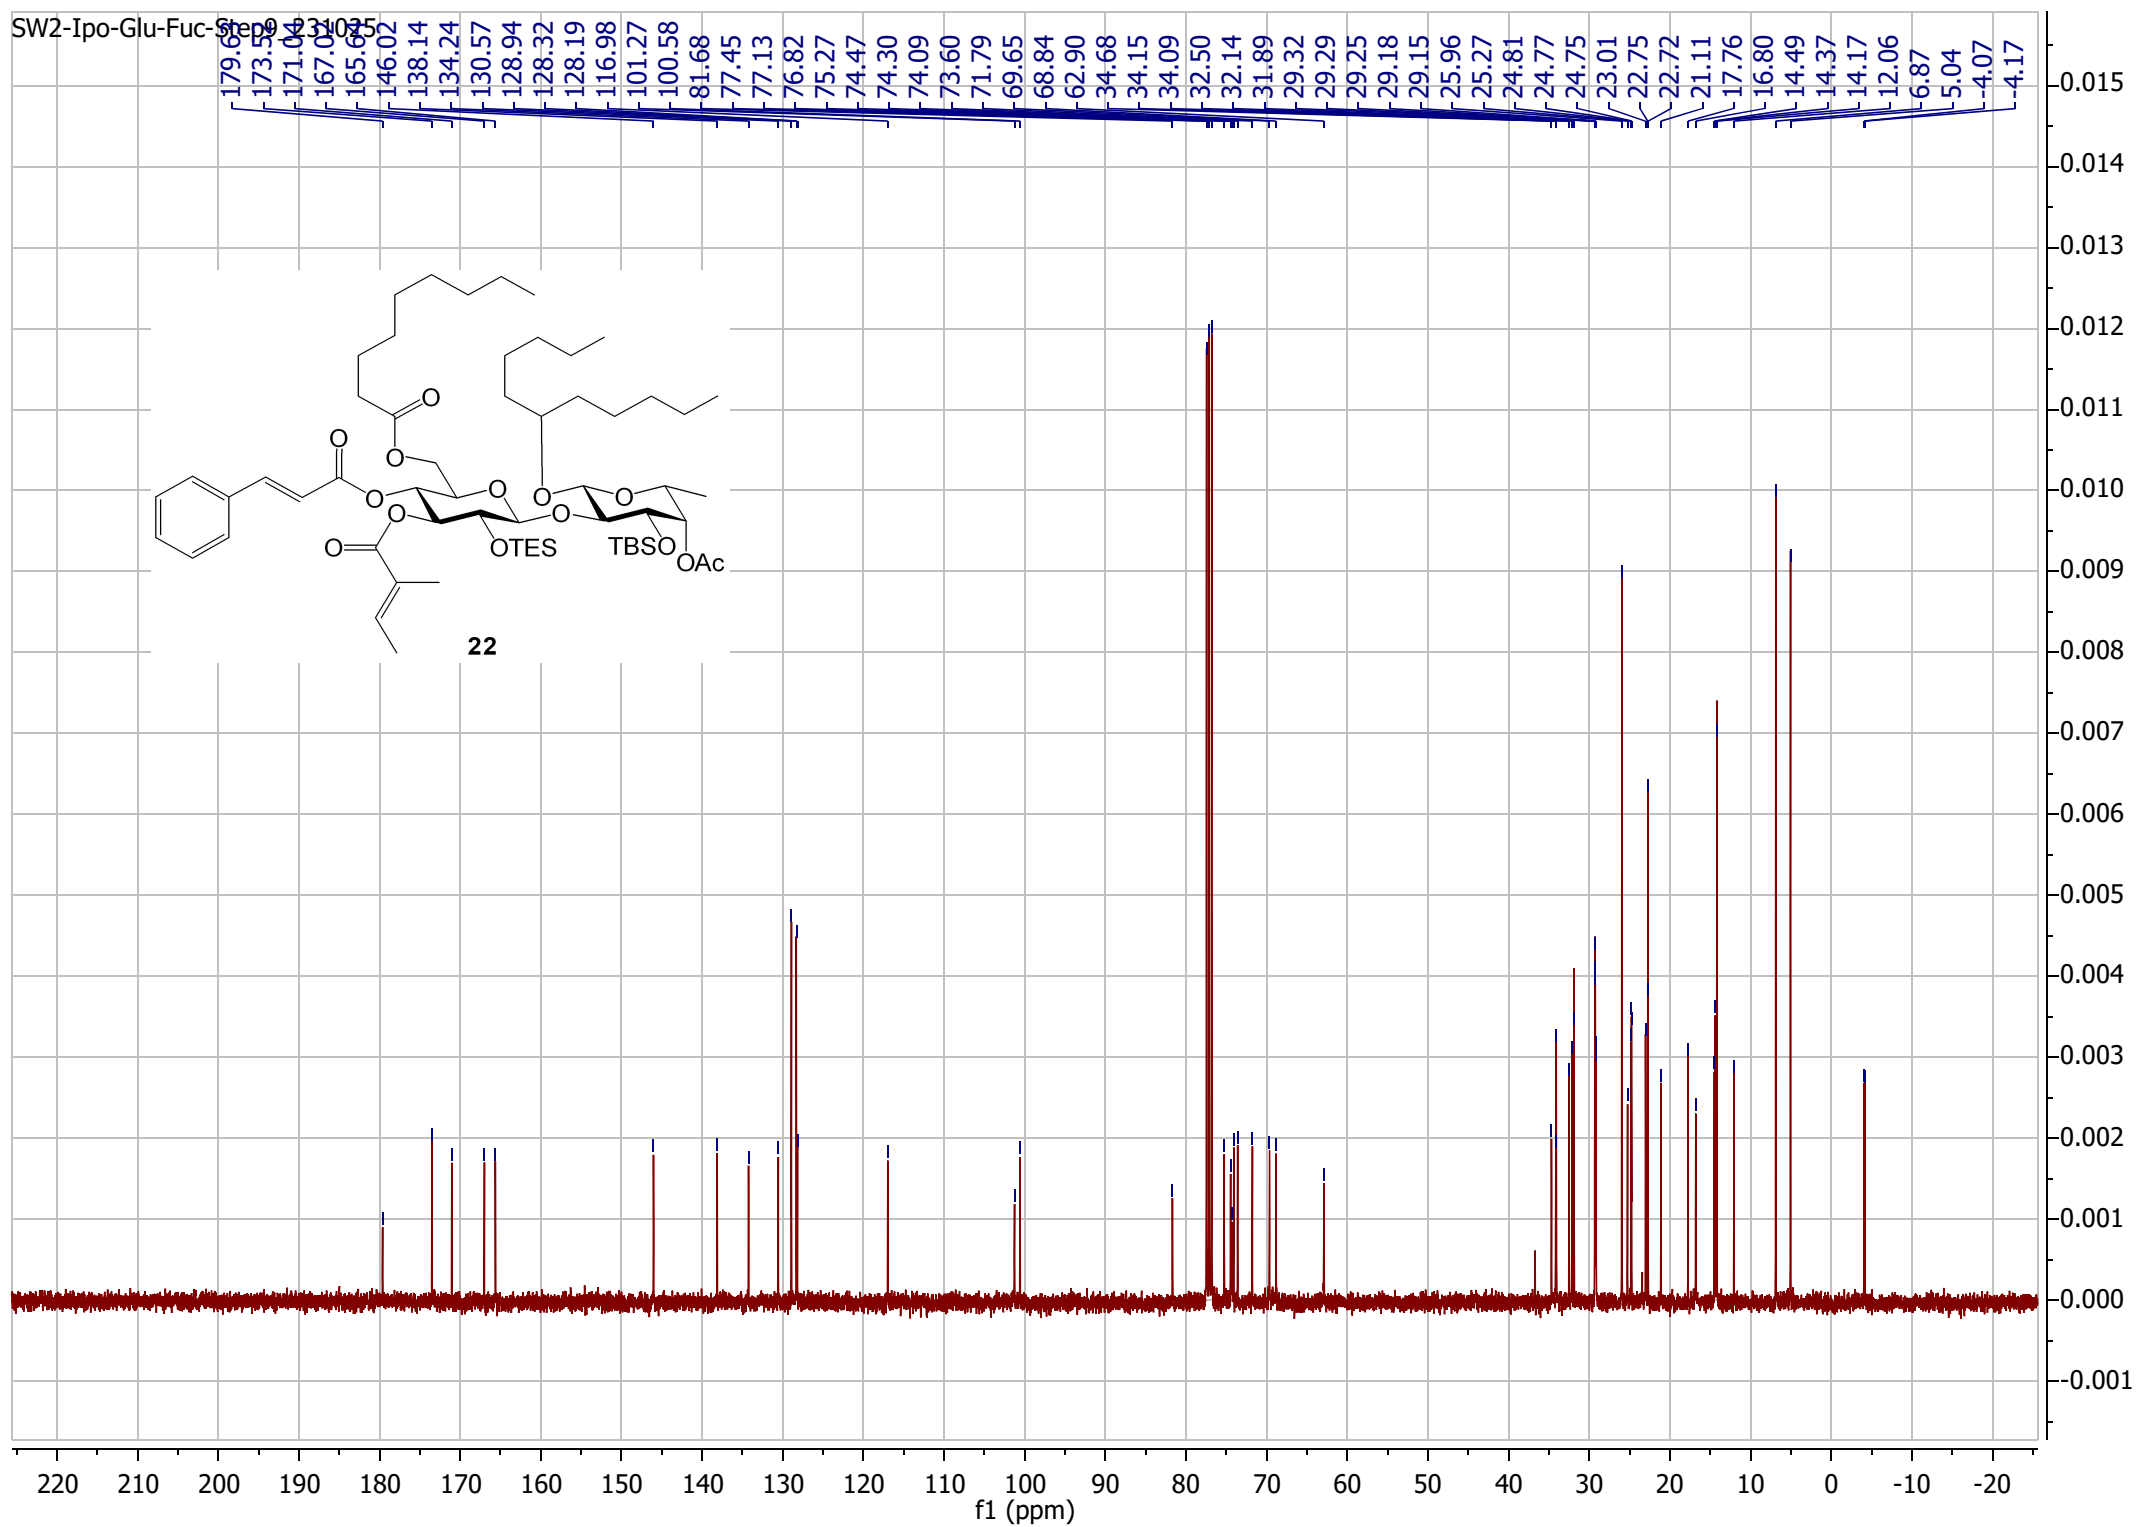

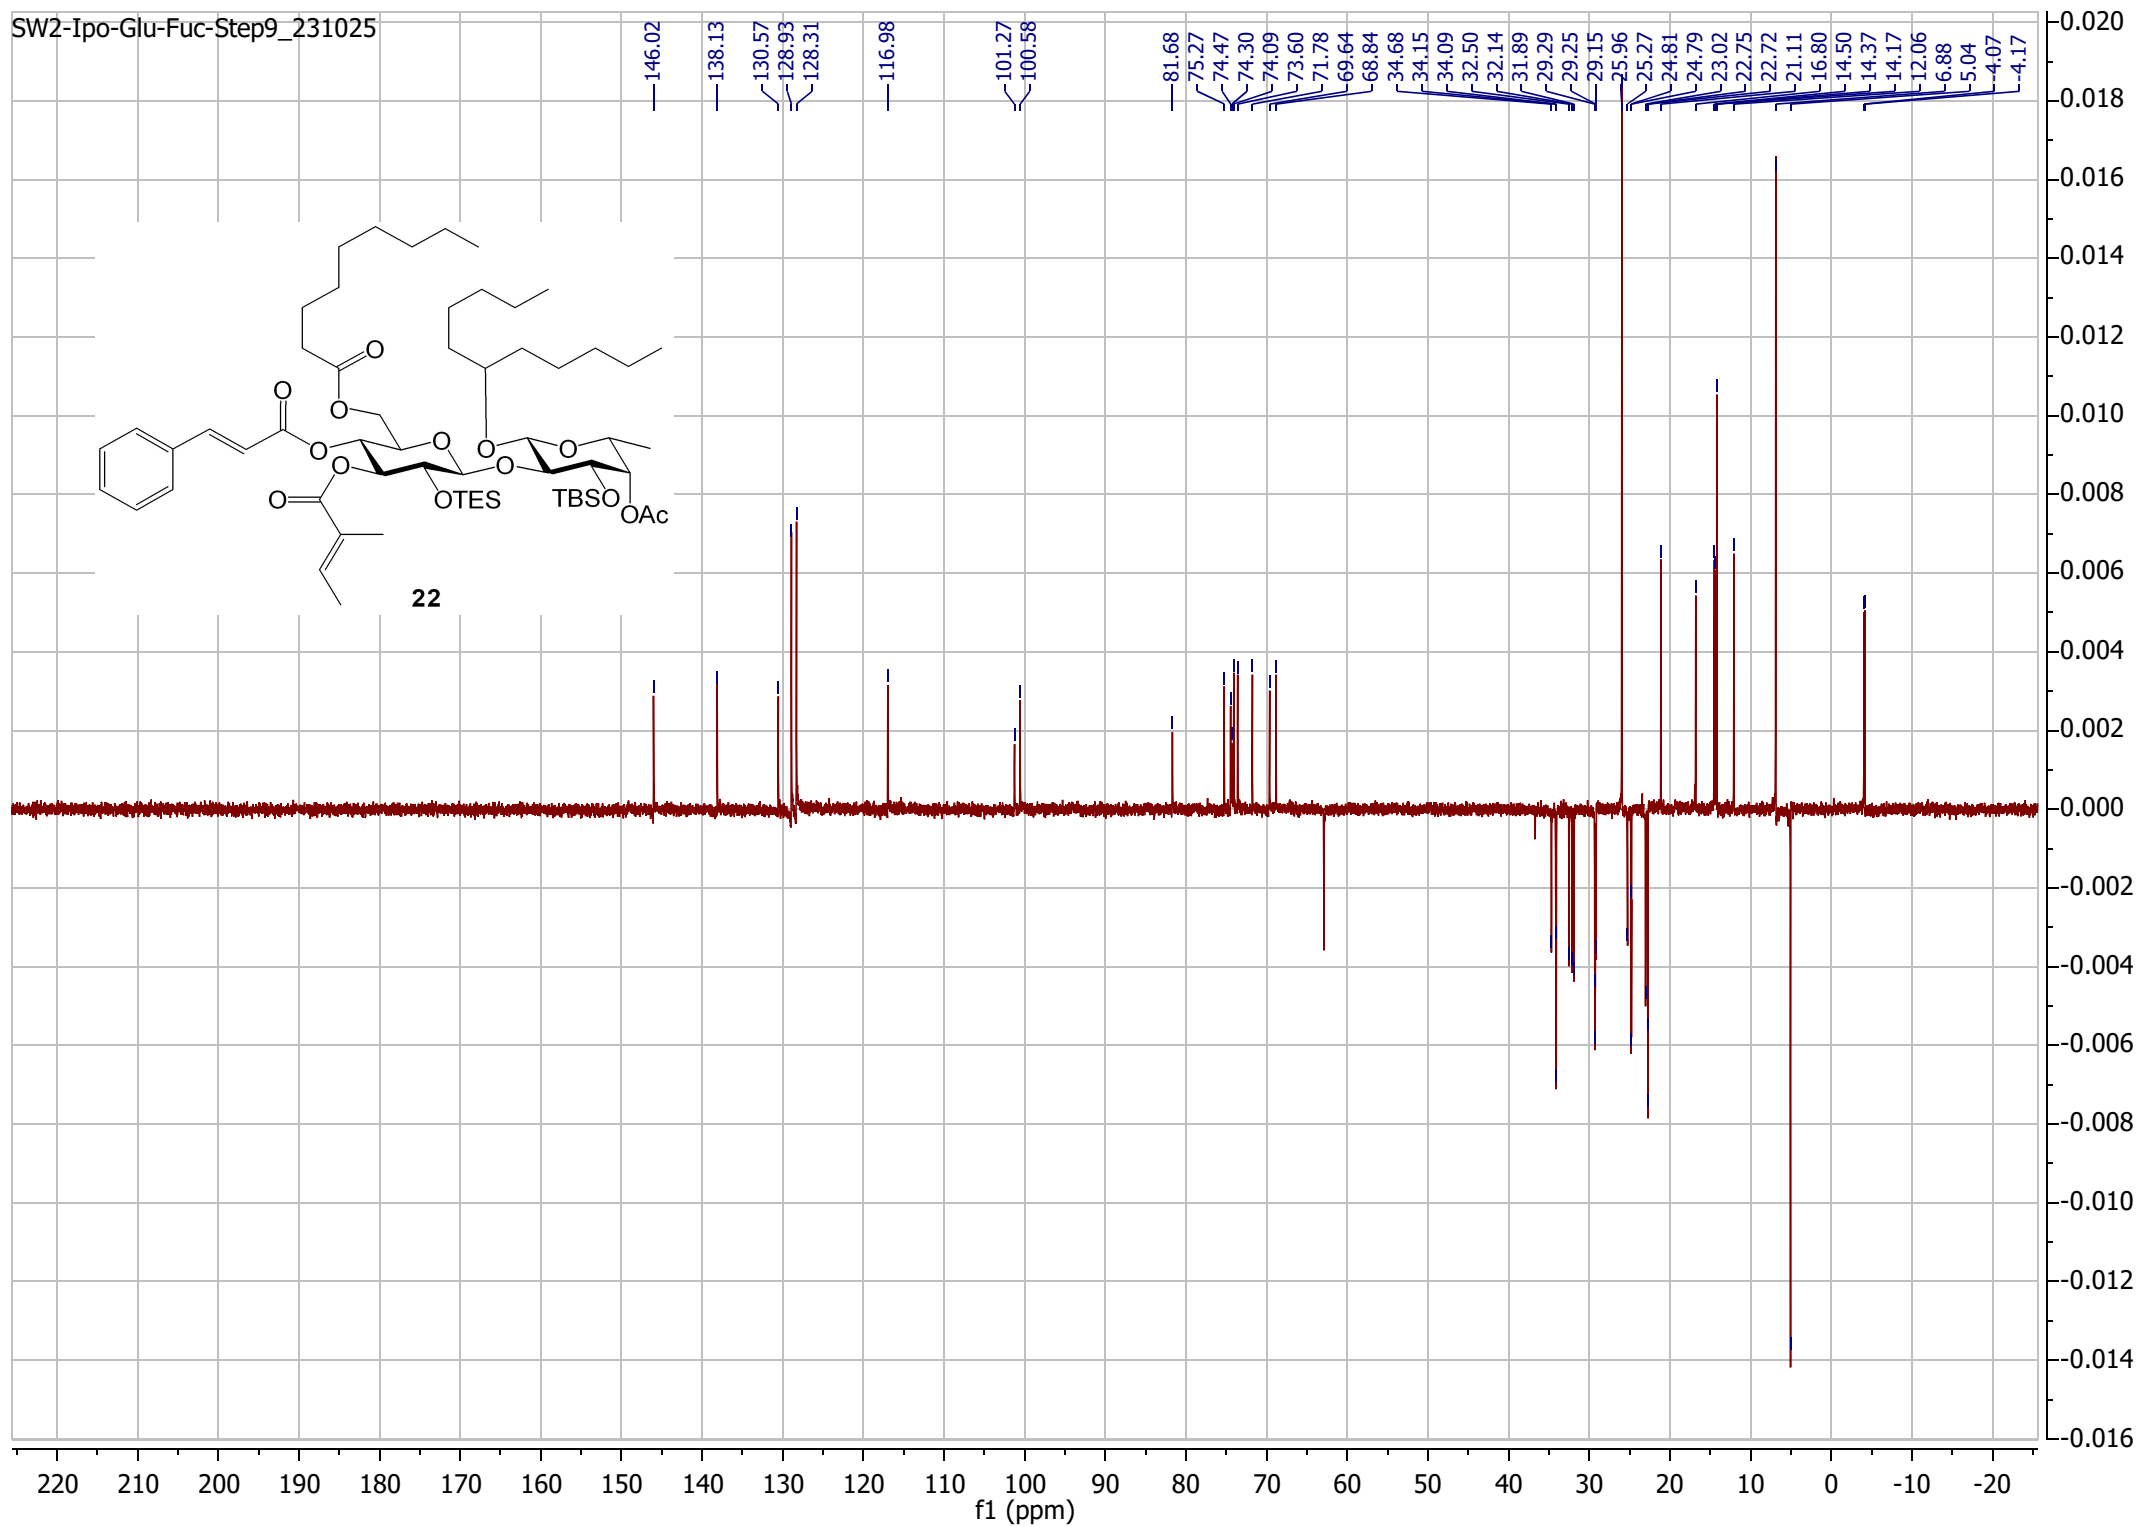

SW2-Ipo-Glu-Fuc-Step9\_231025

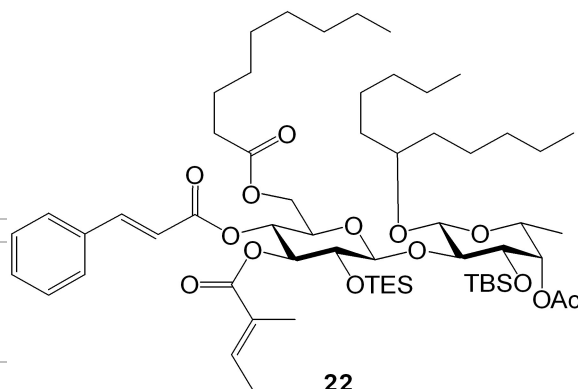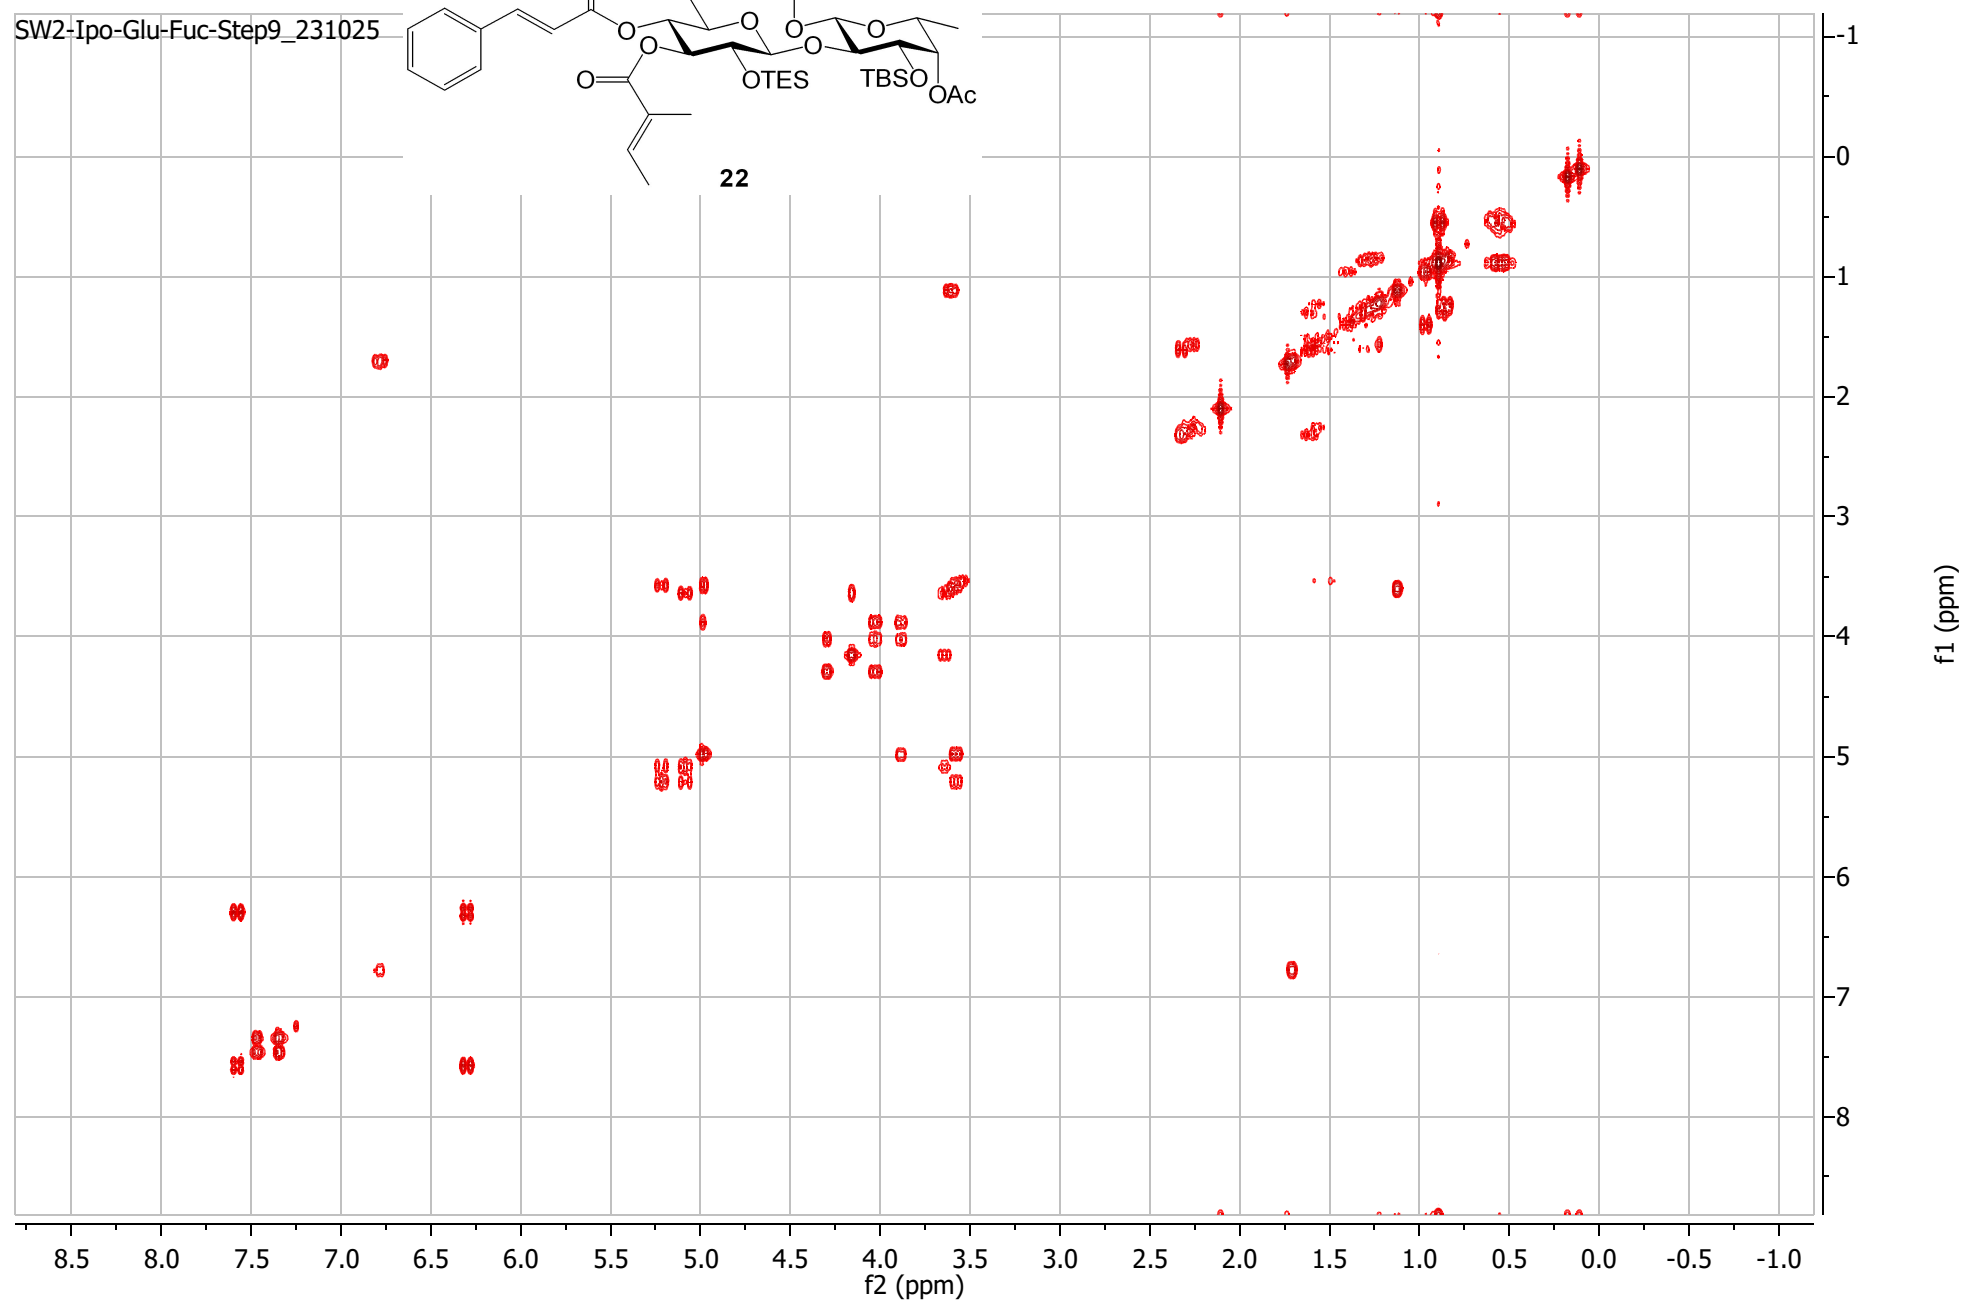

SW2-Ipo-Glu-Fuc-Step9\_231025

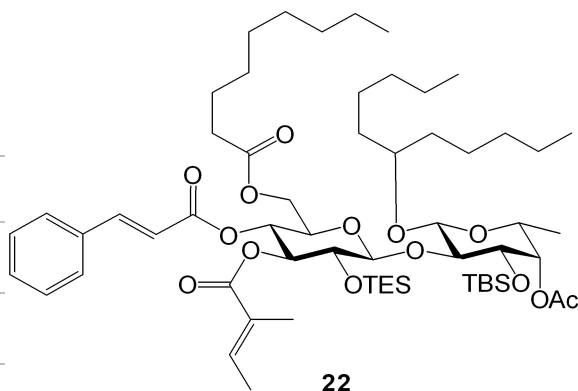

22

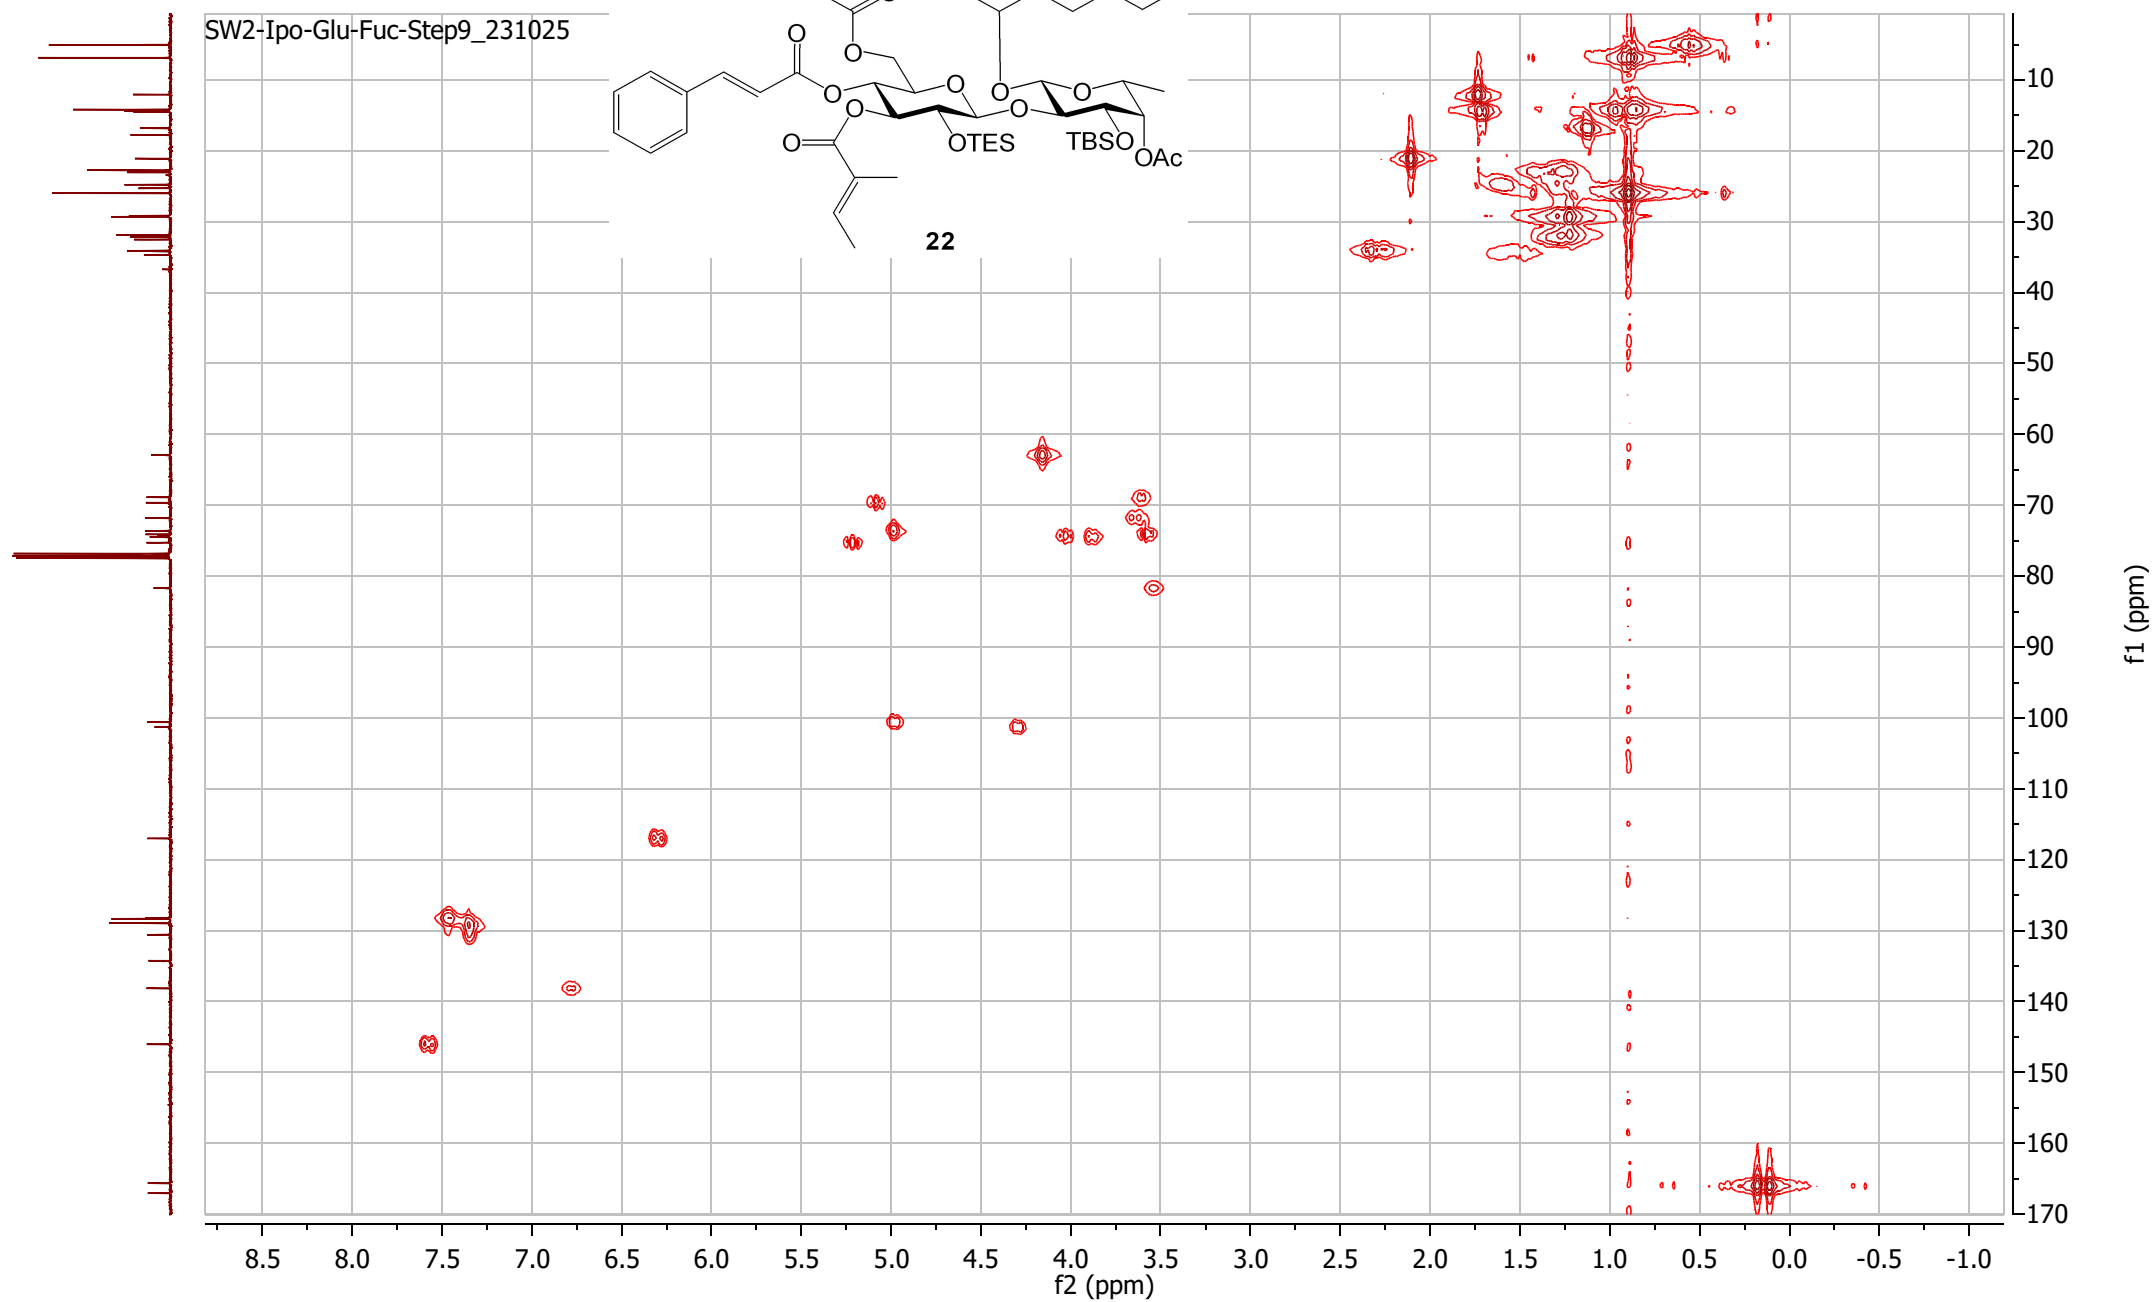

SW2-Ipo-Glu-Fuc-Step9.

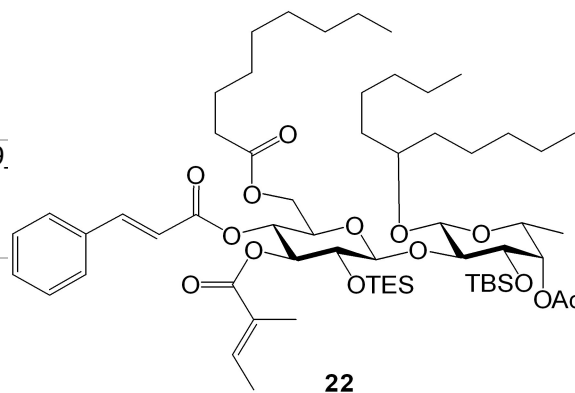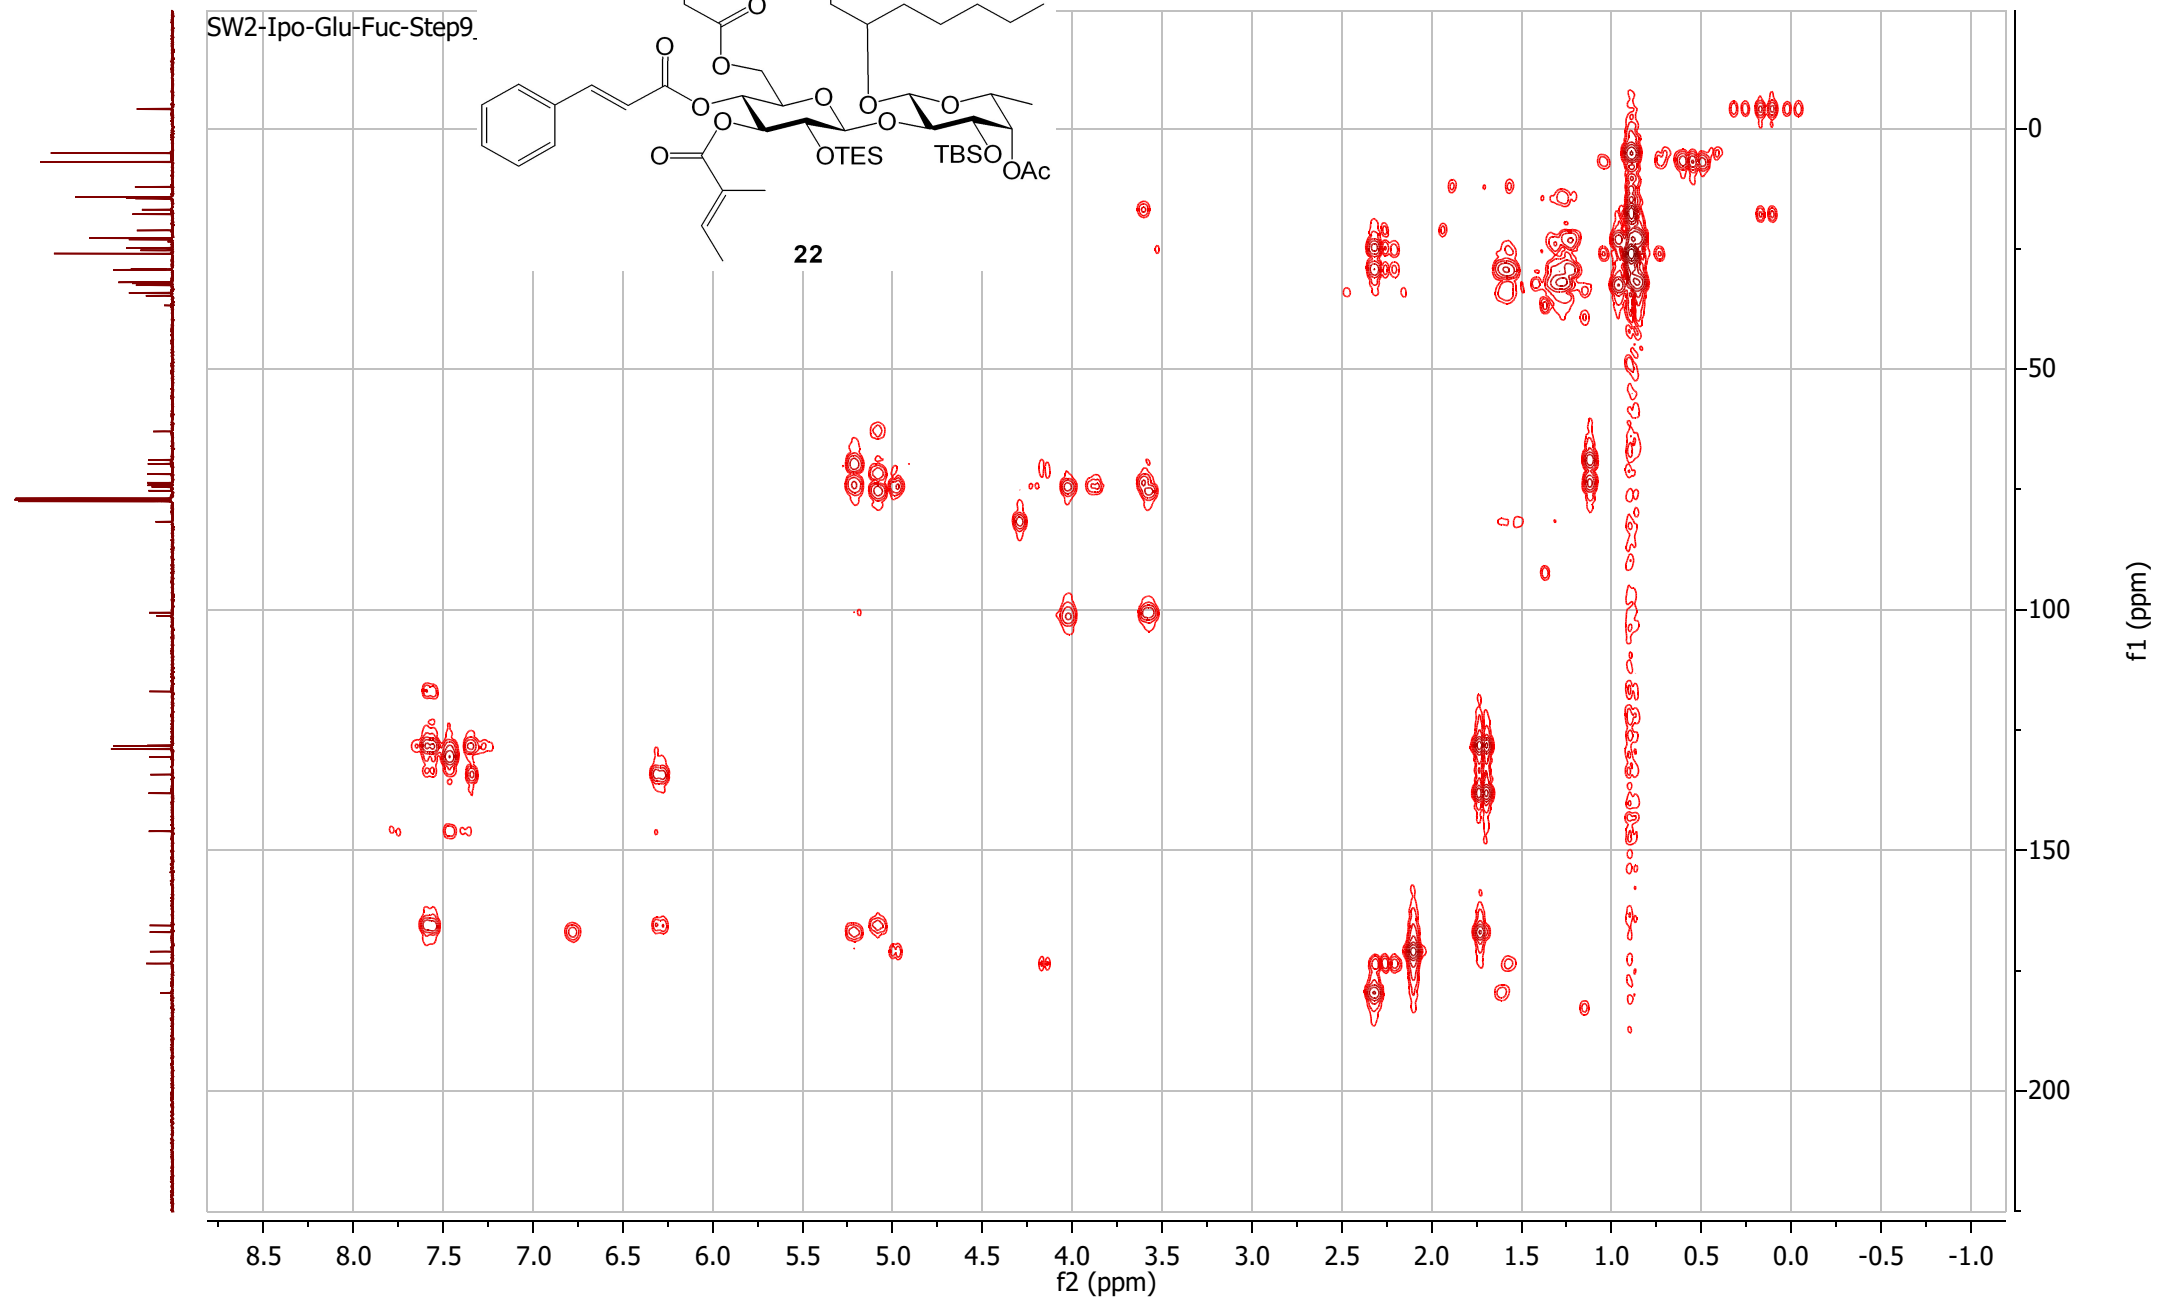

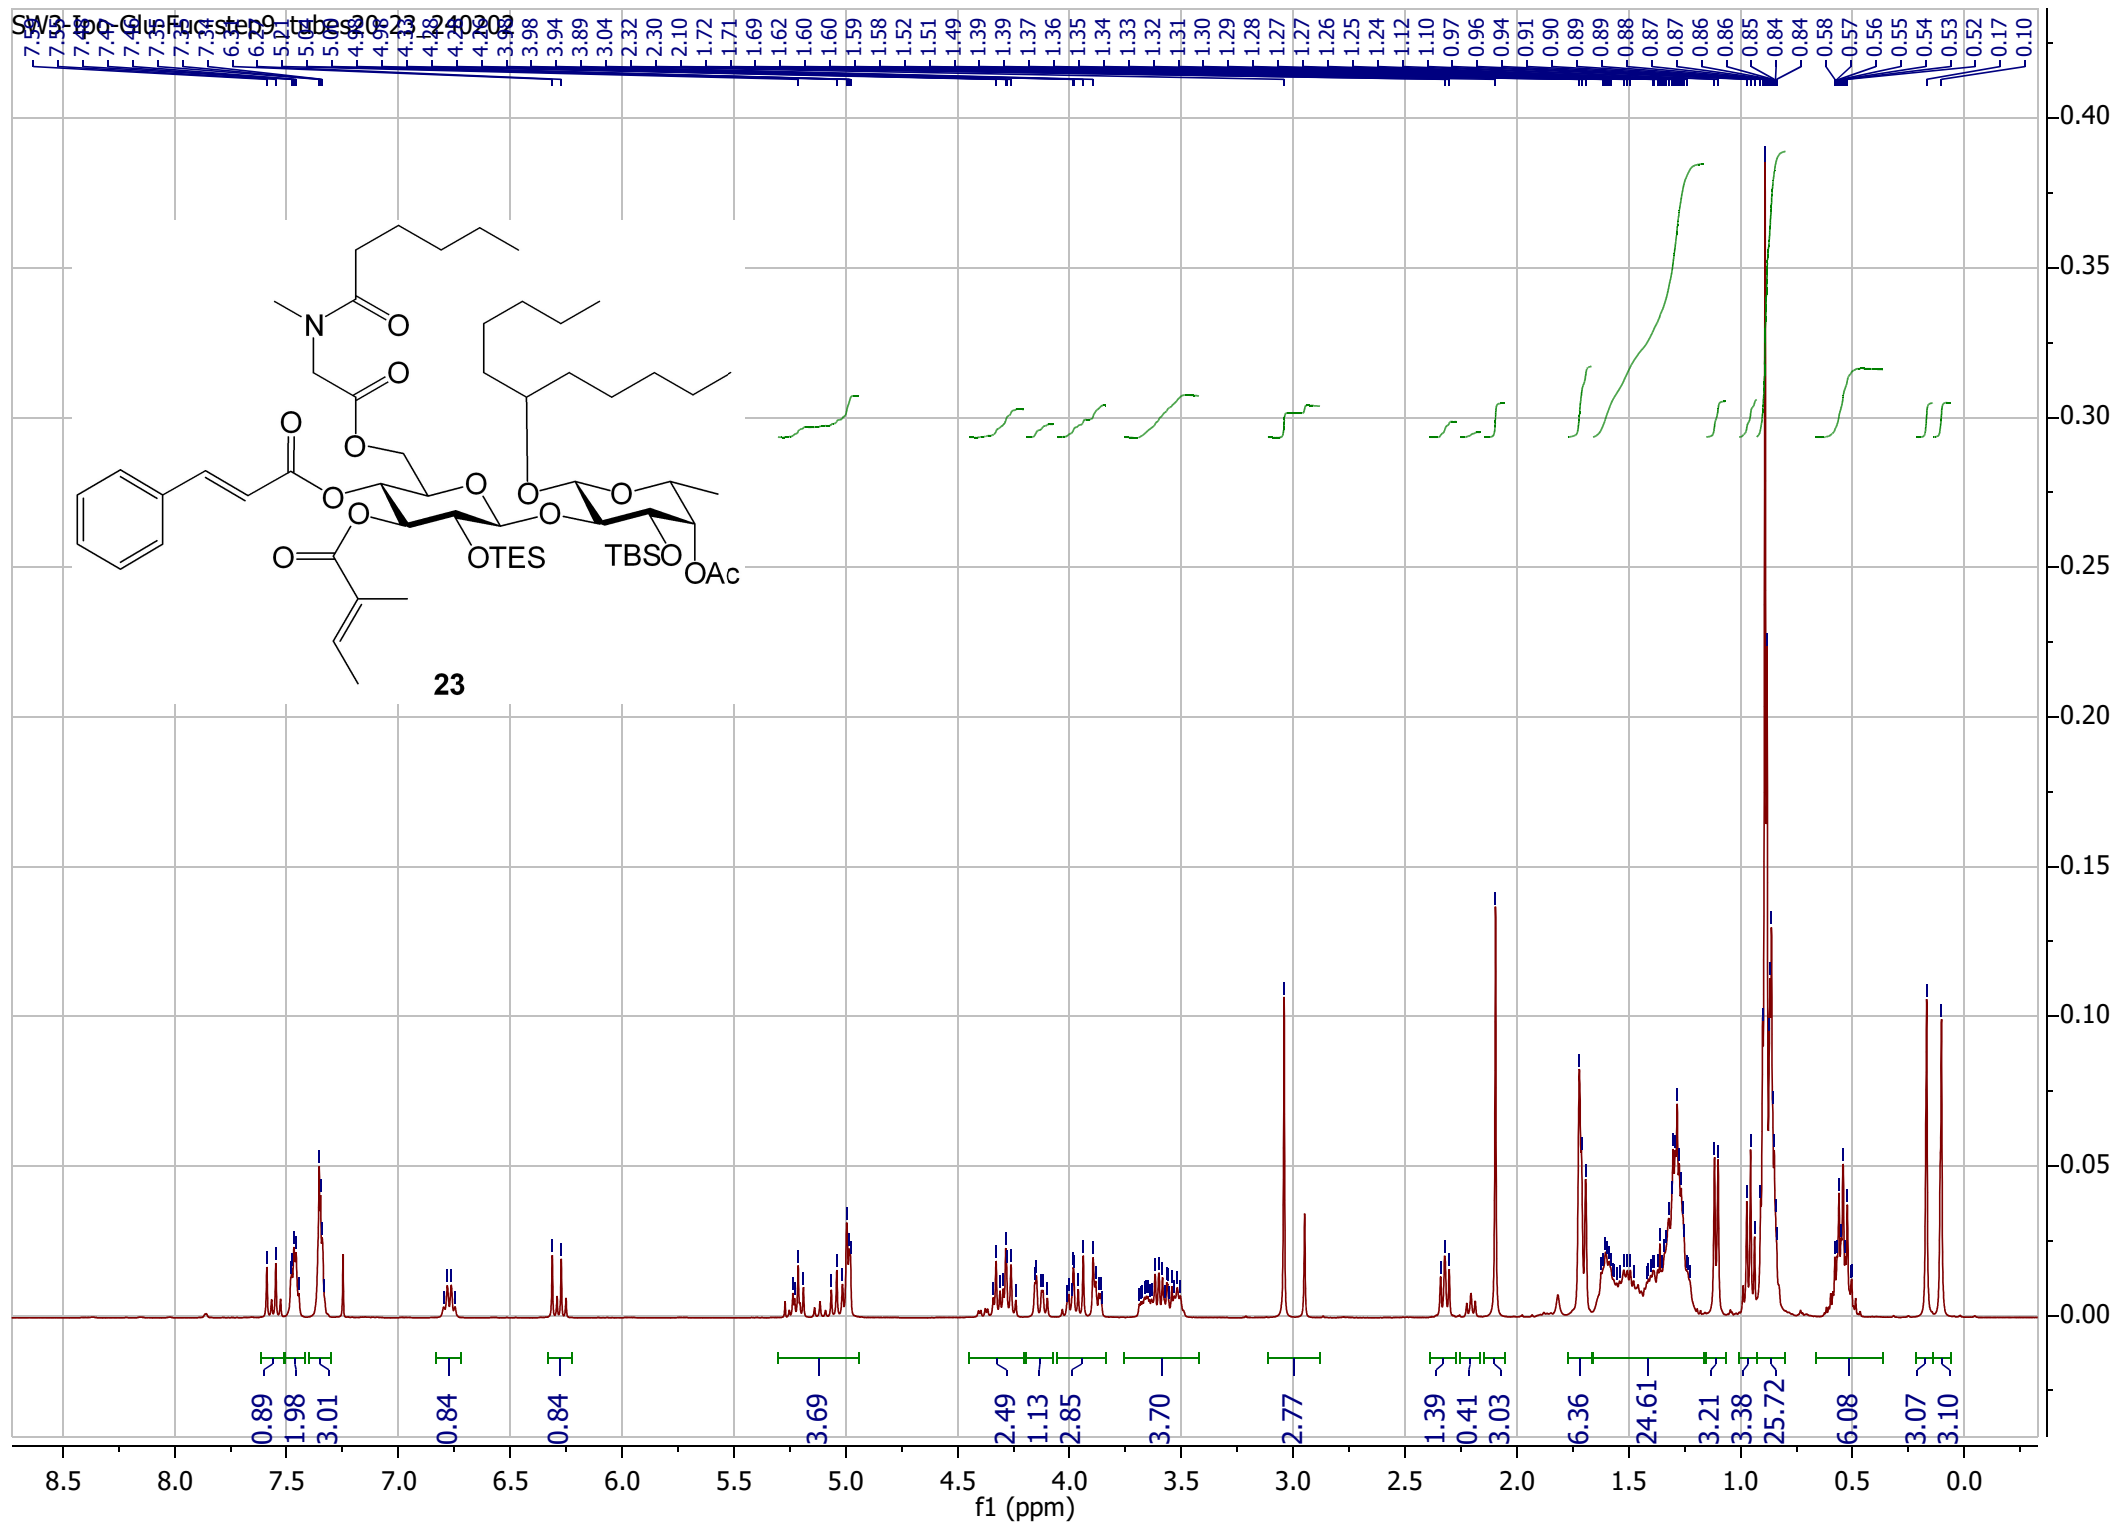

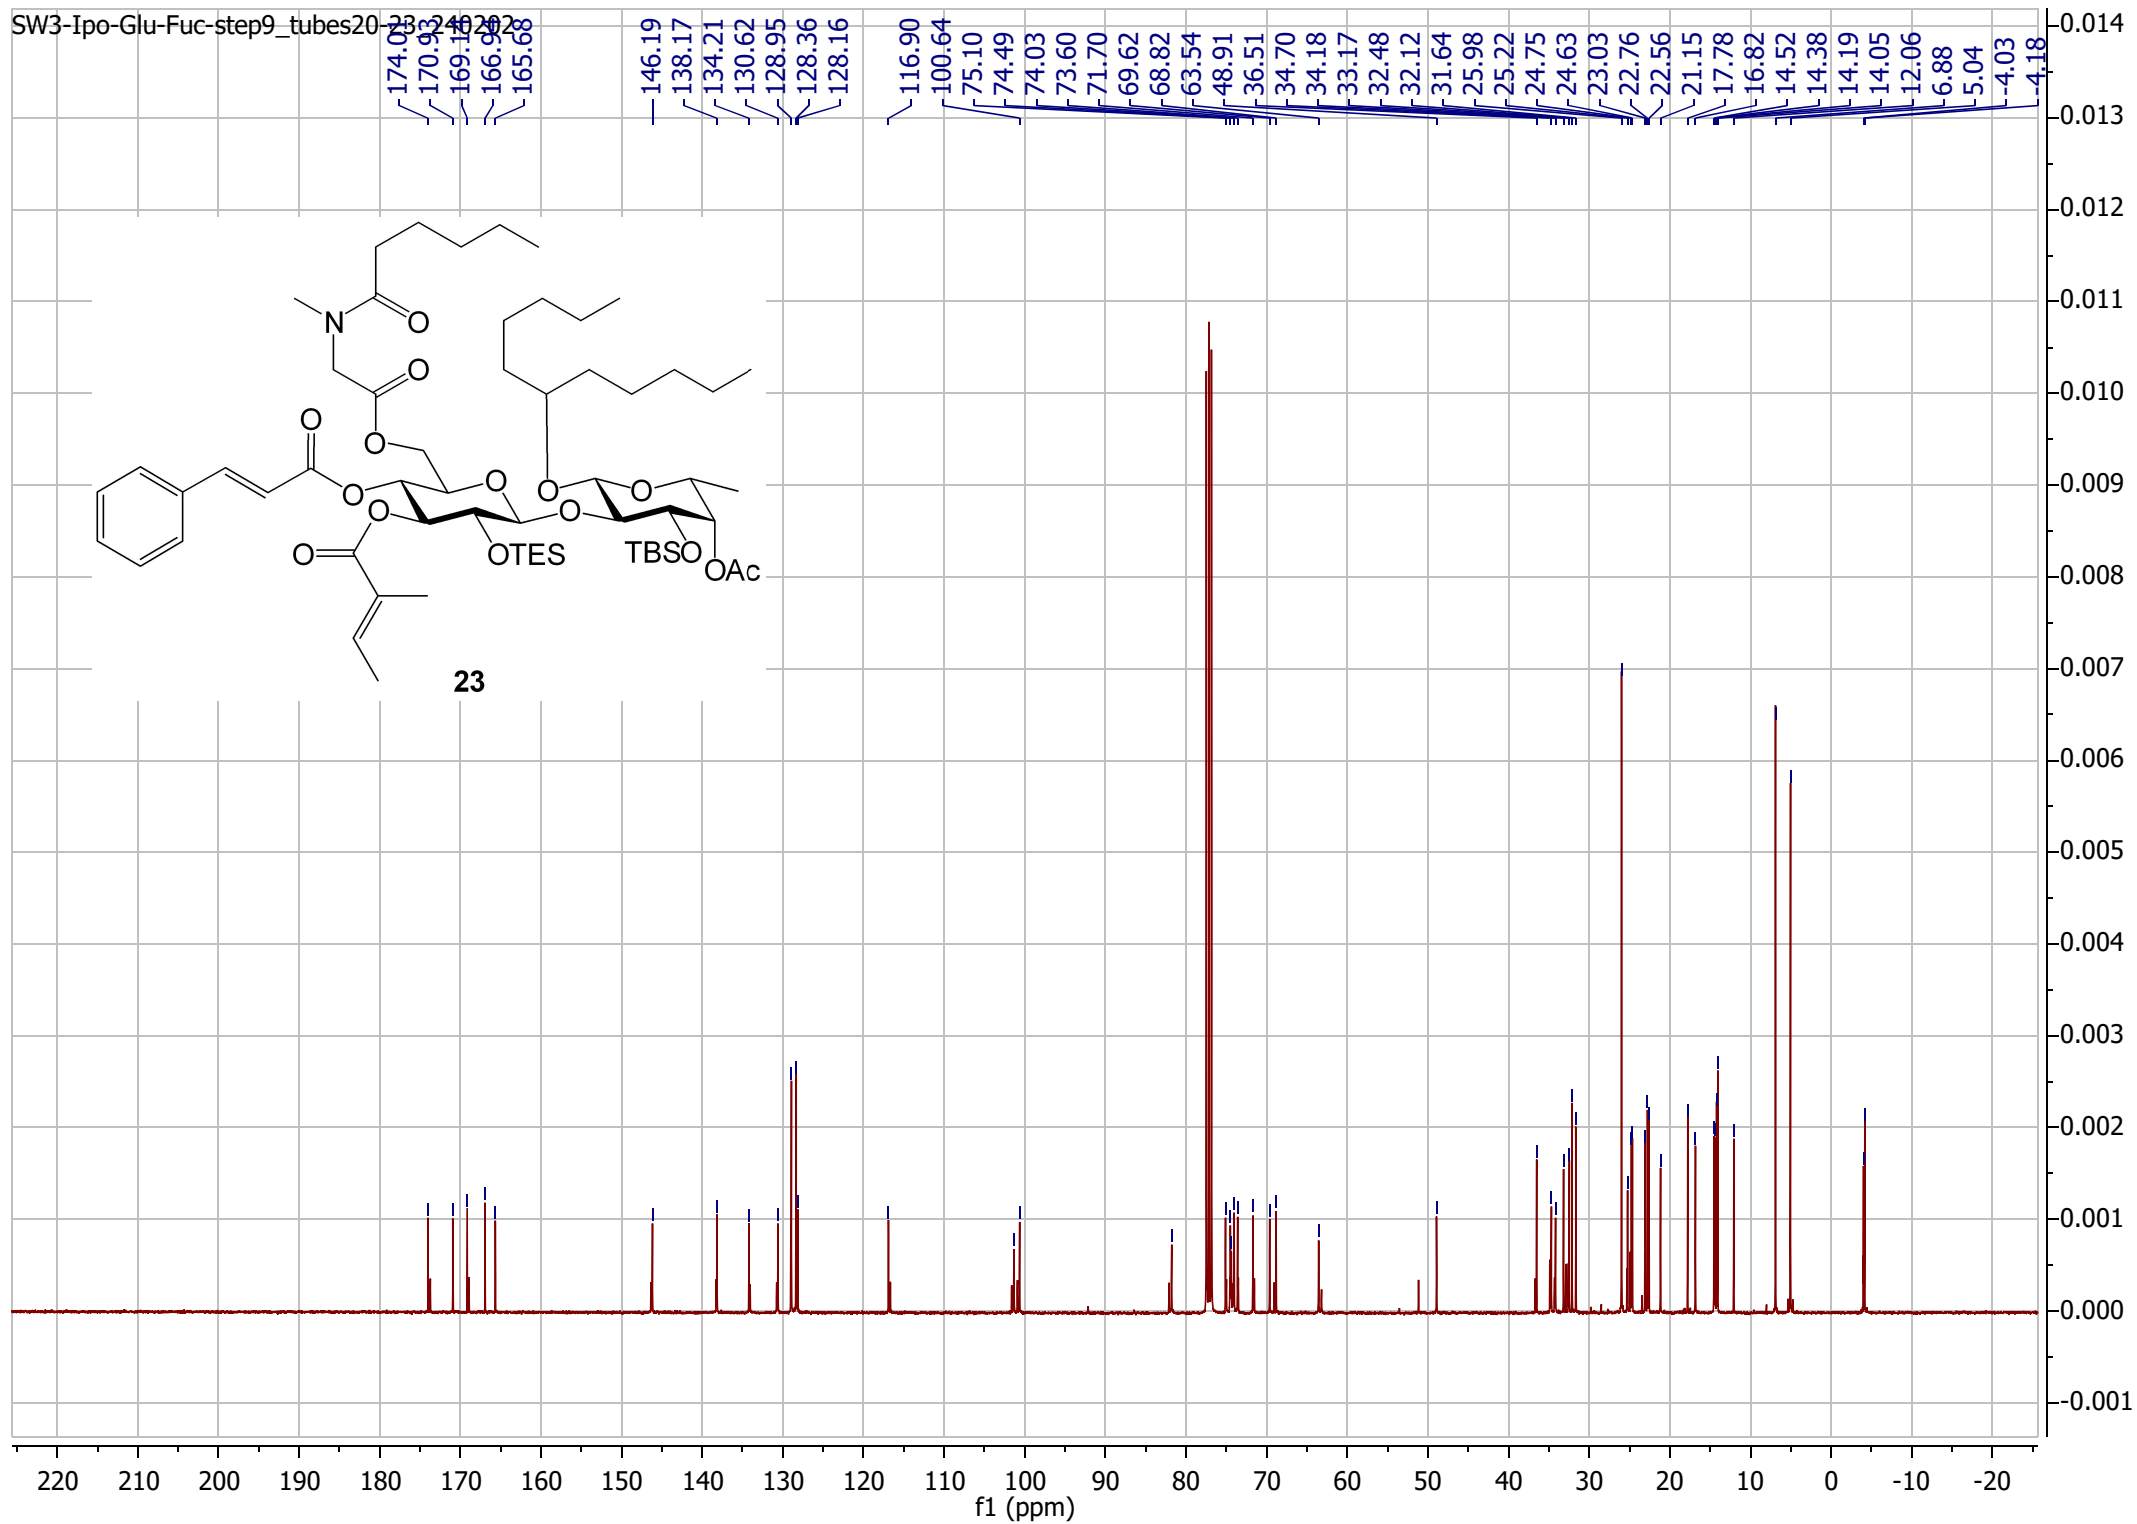



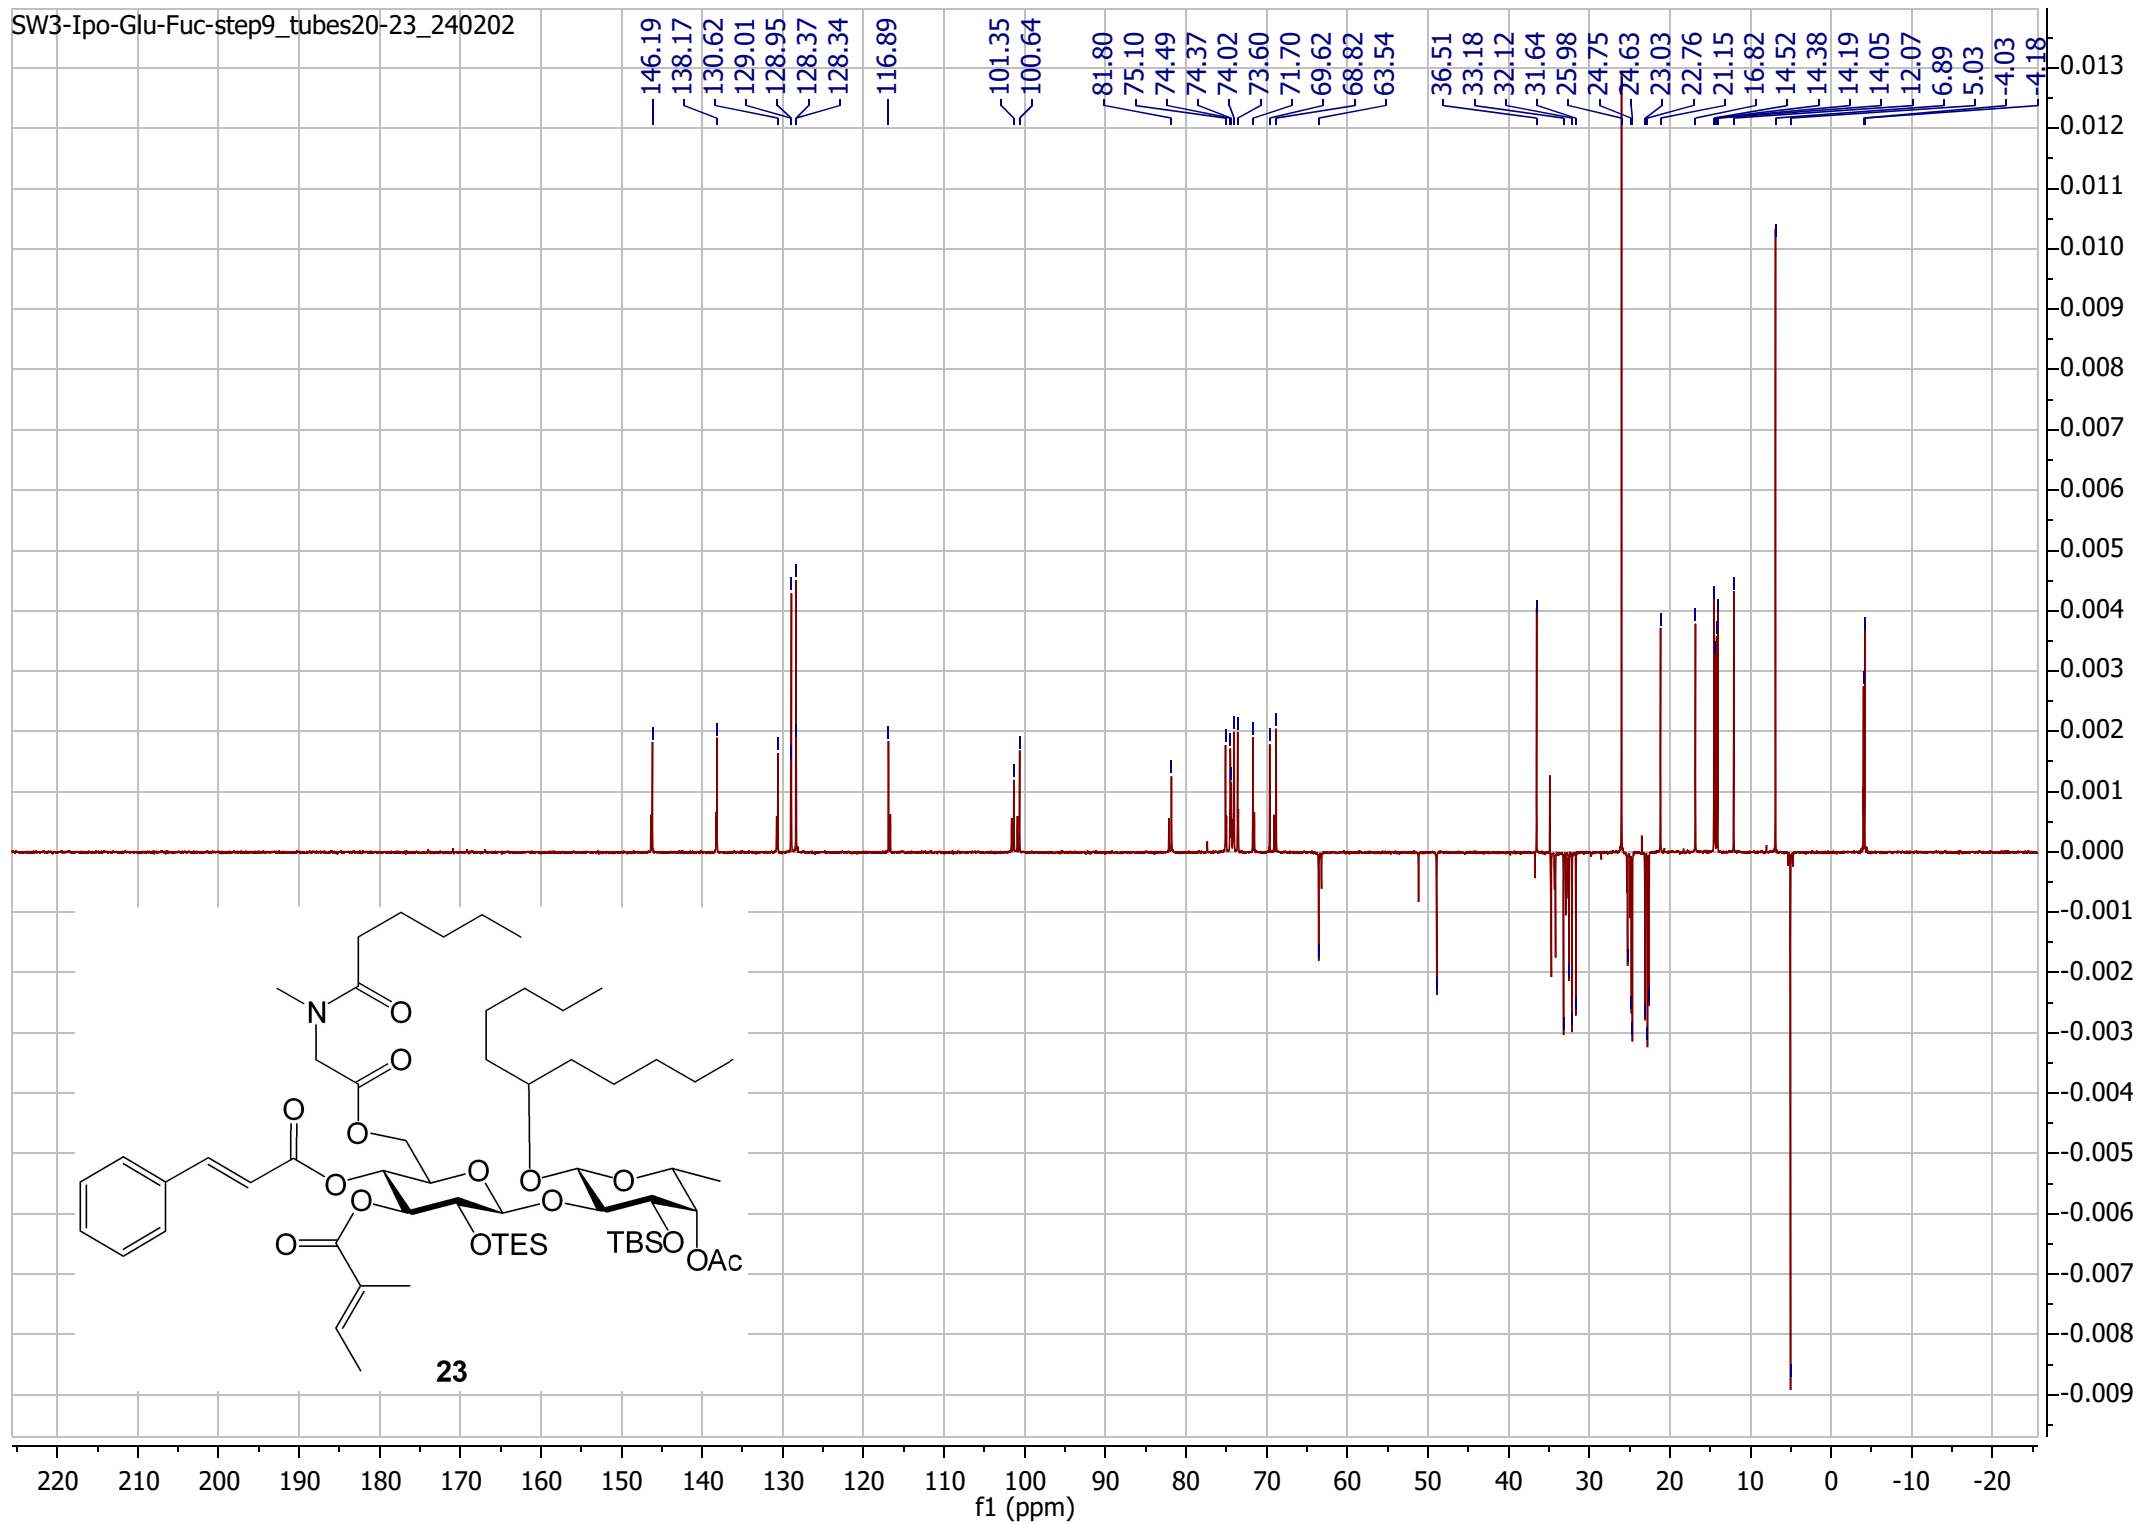

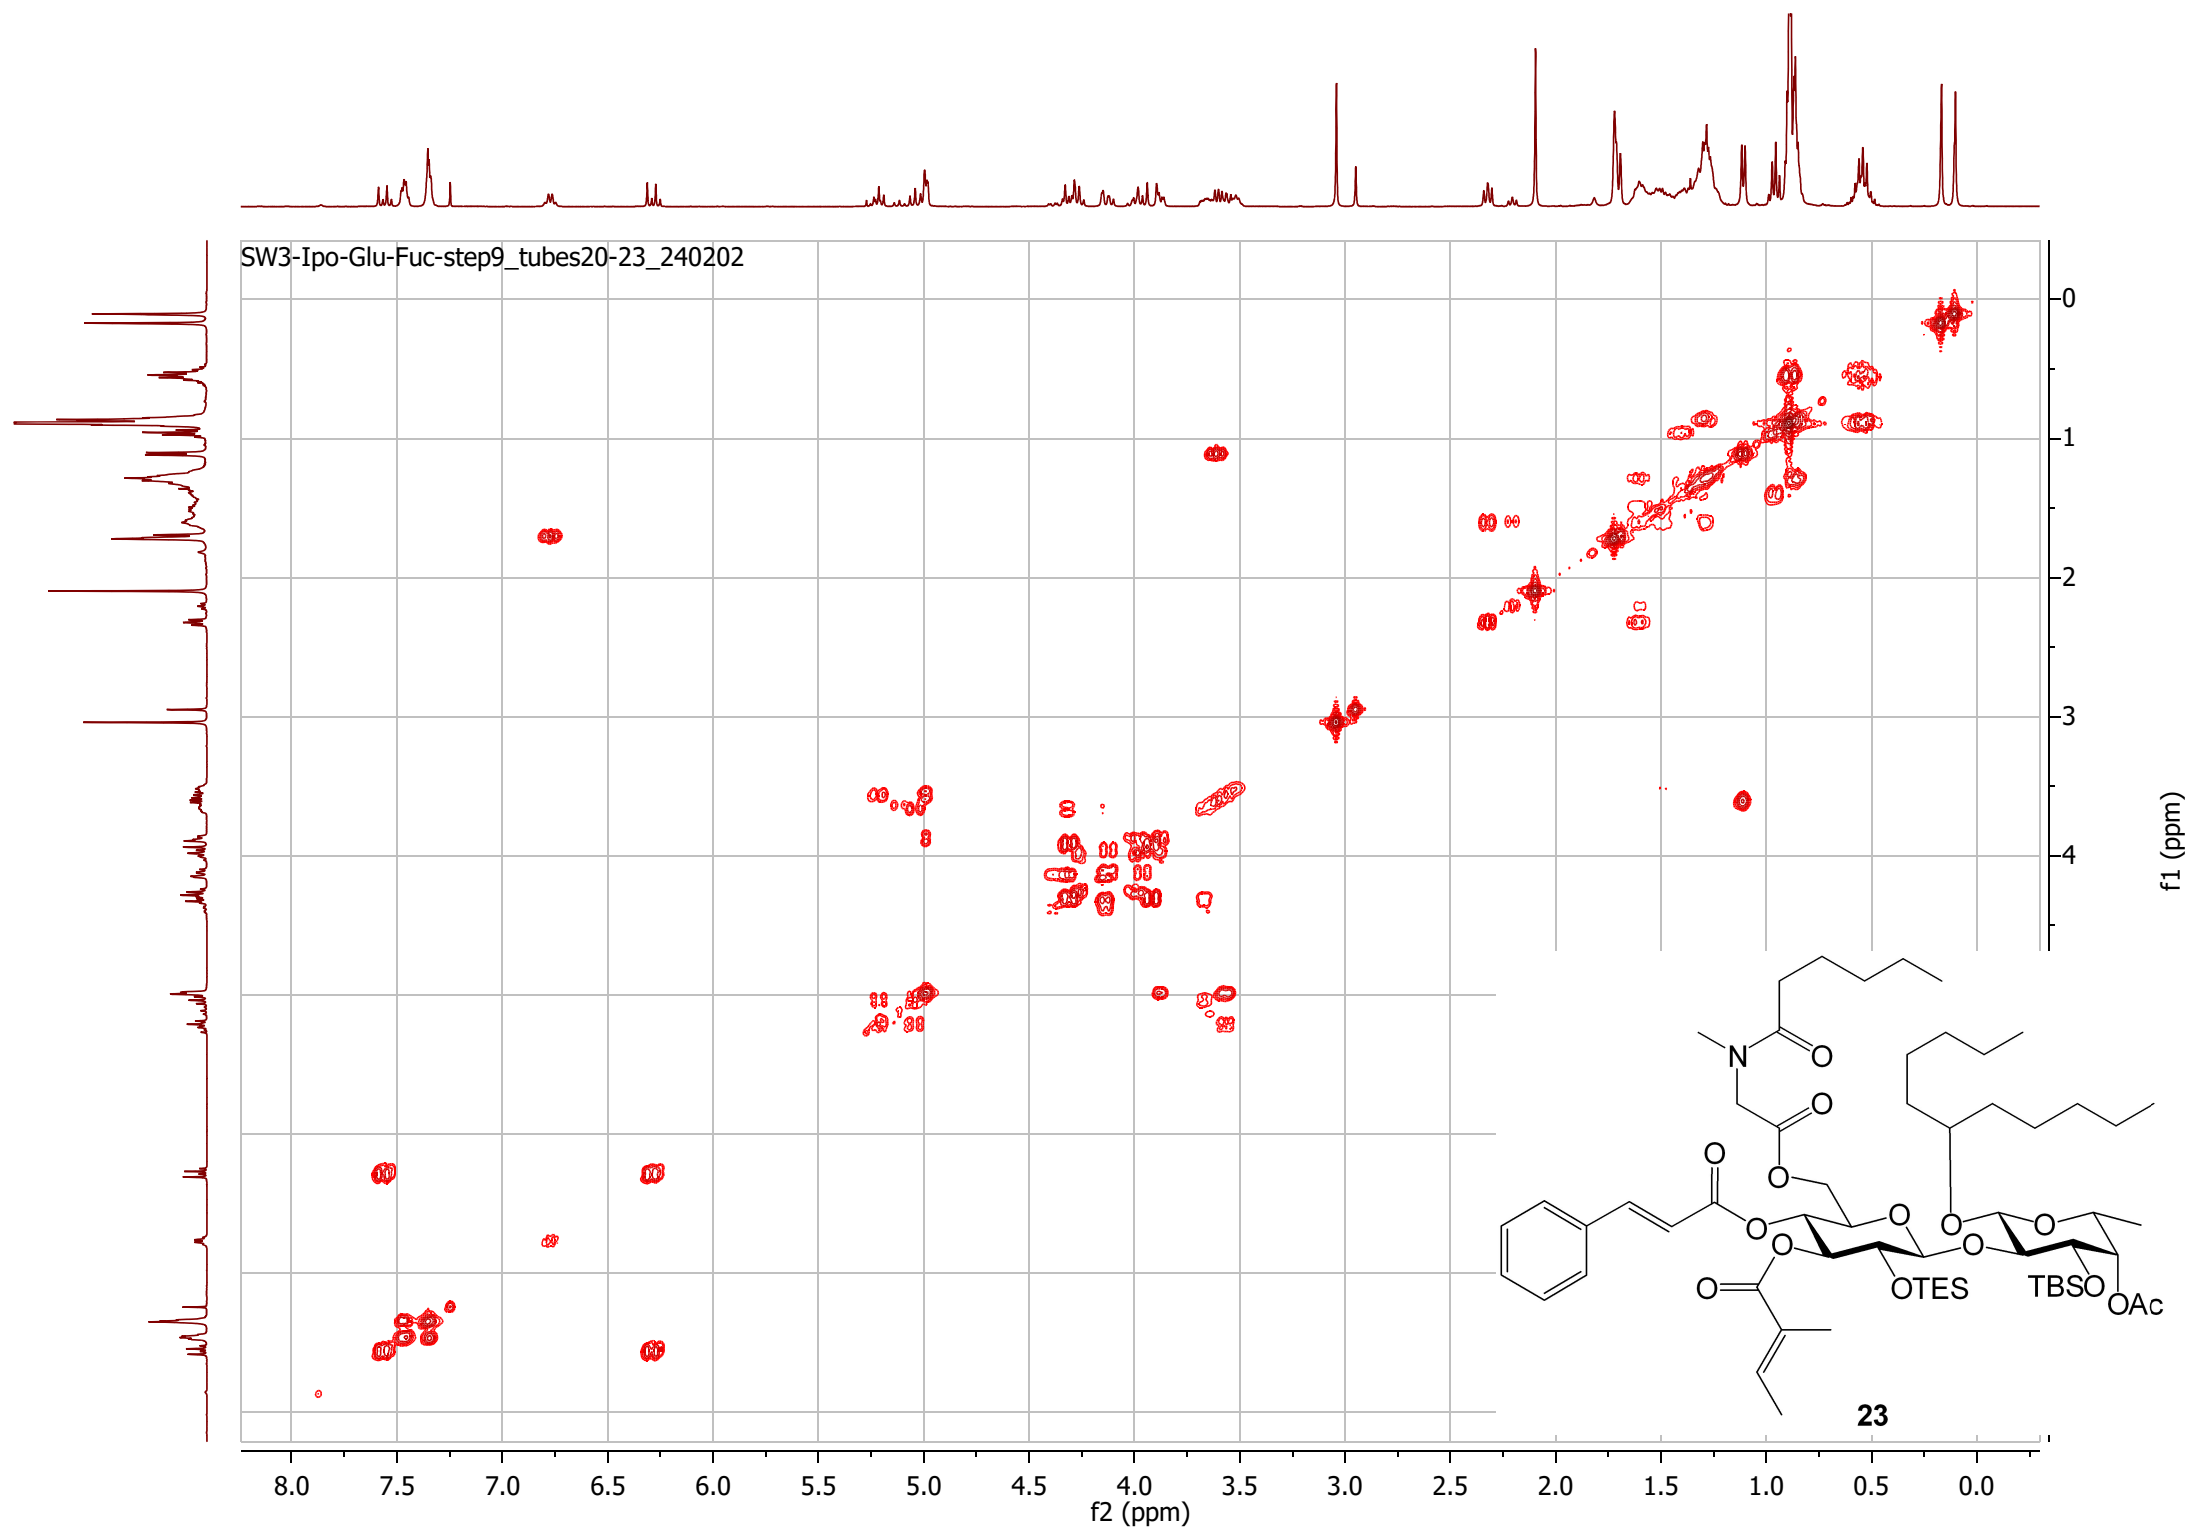

SW3-Ipo-Glu-Fuc-step9\_tubes20-23\_240202

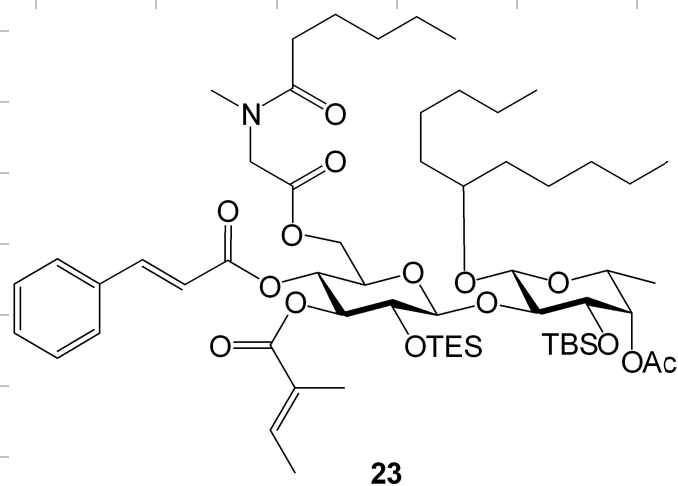

23

f2 (ppm)

f1 (ppm)

SW3-Ipo-Glu-Fuc-step9\_tubes20-23\_240202

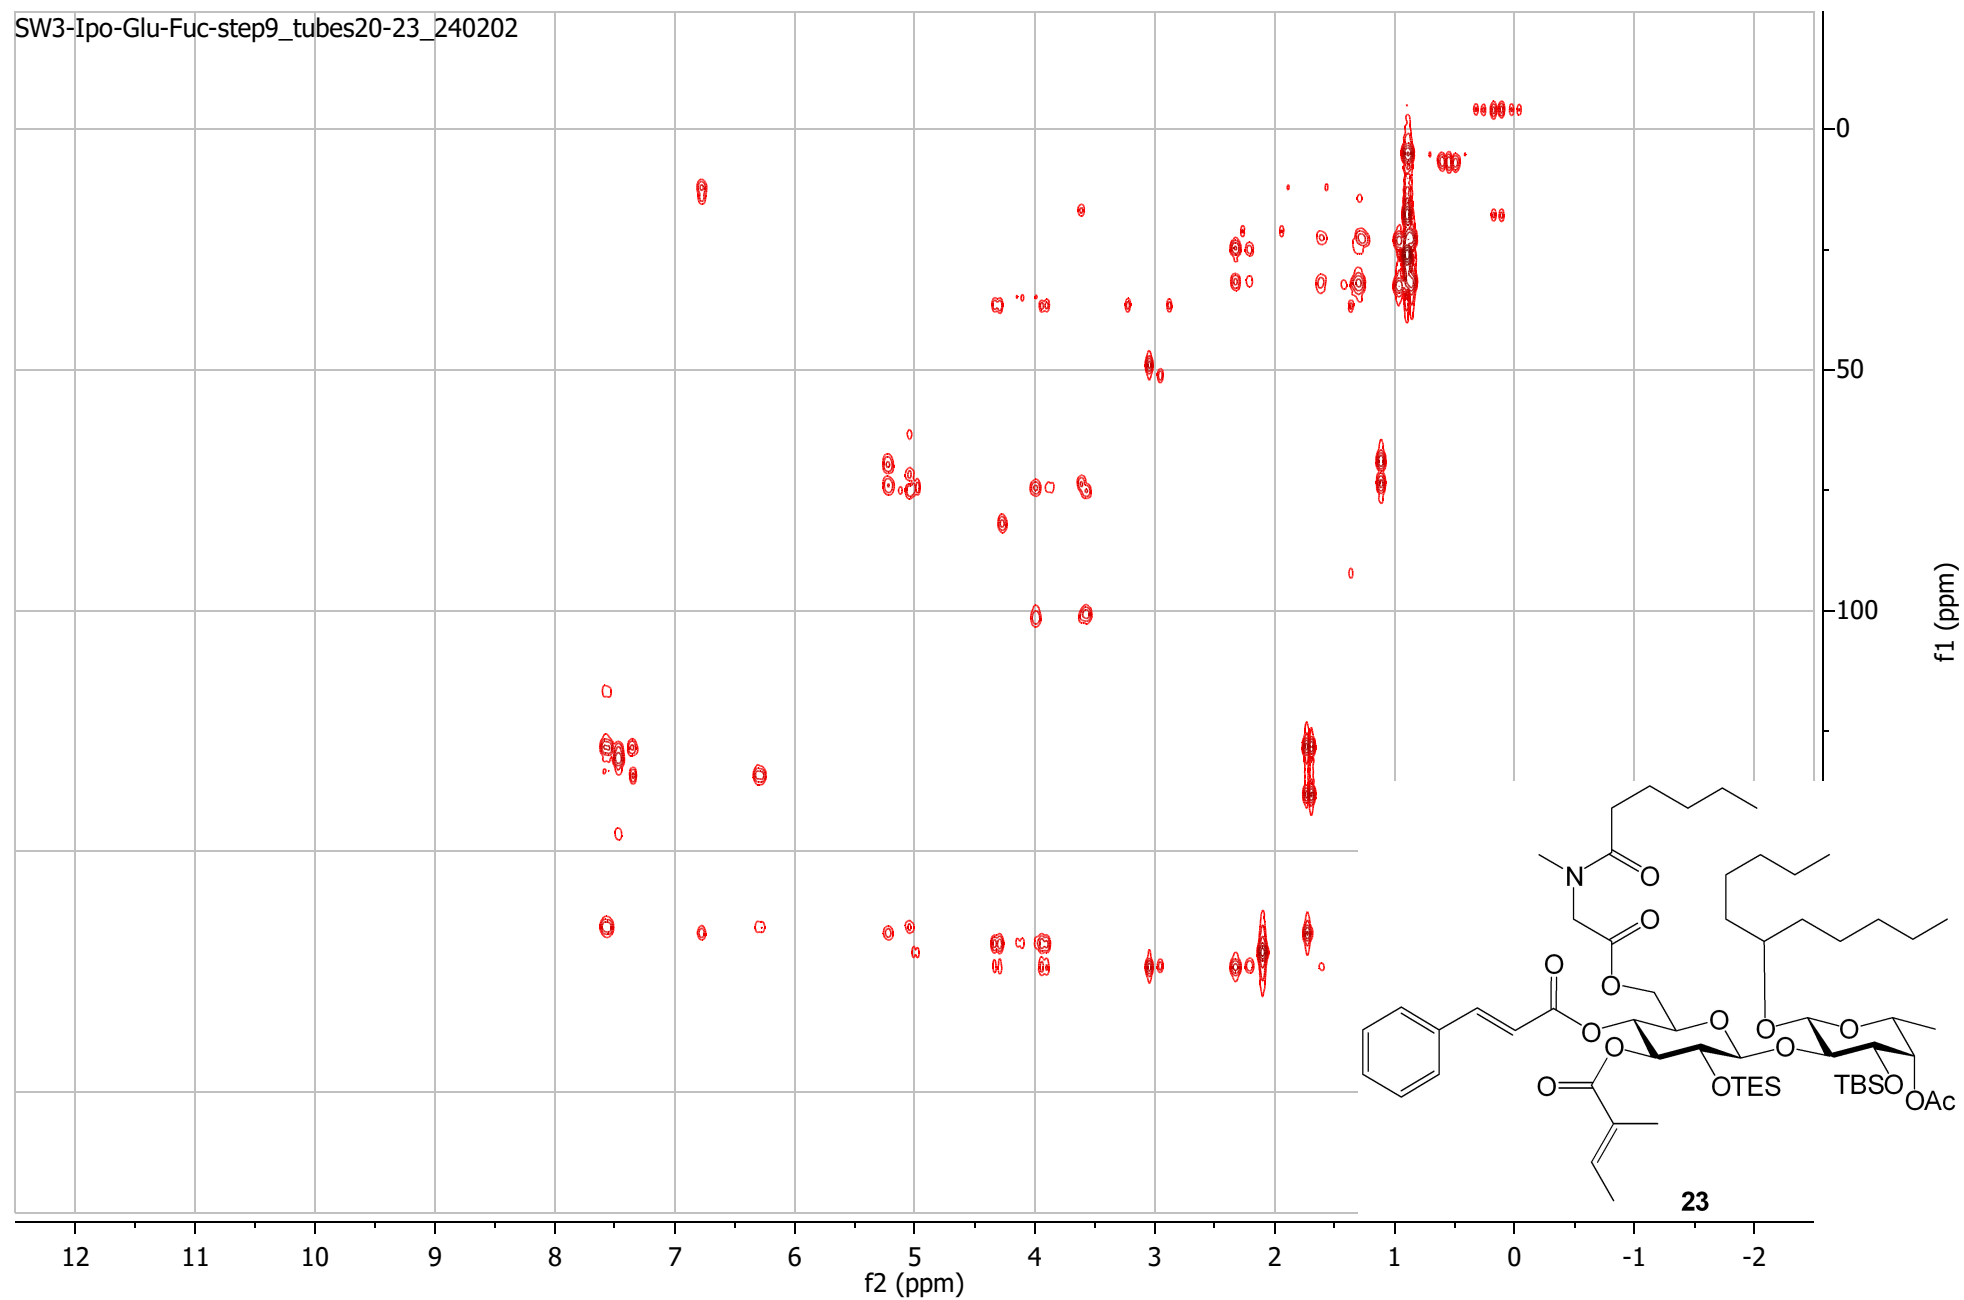

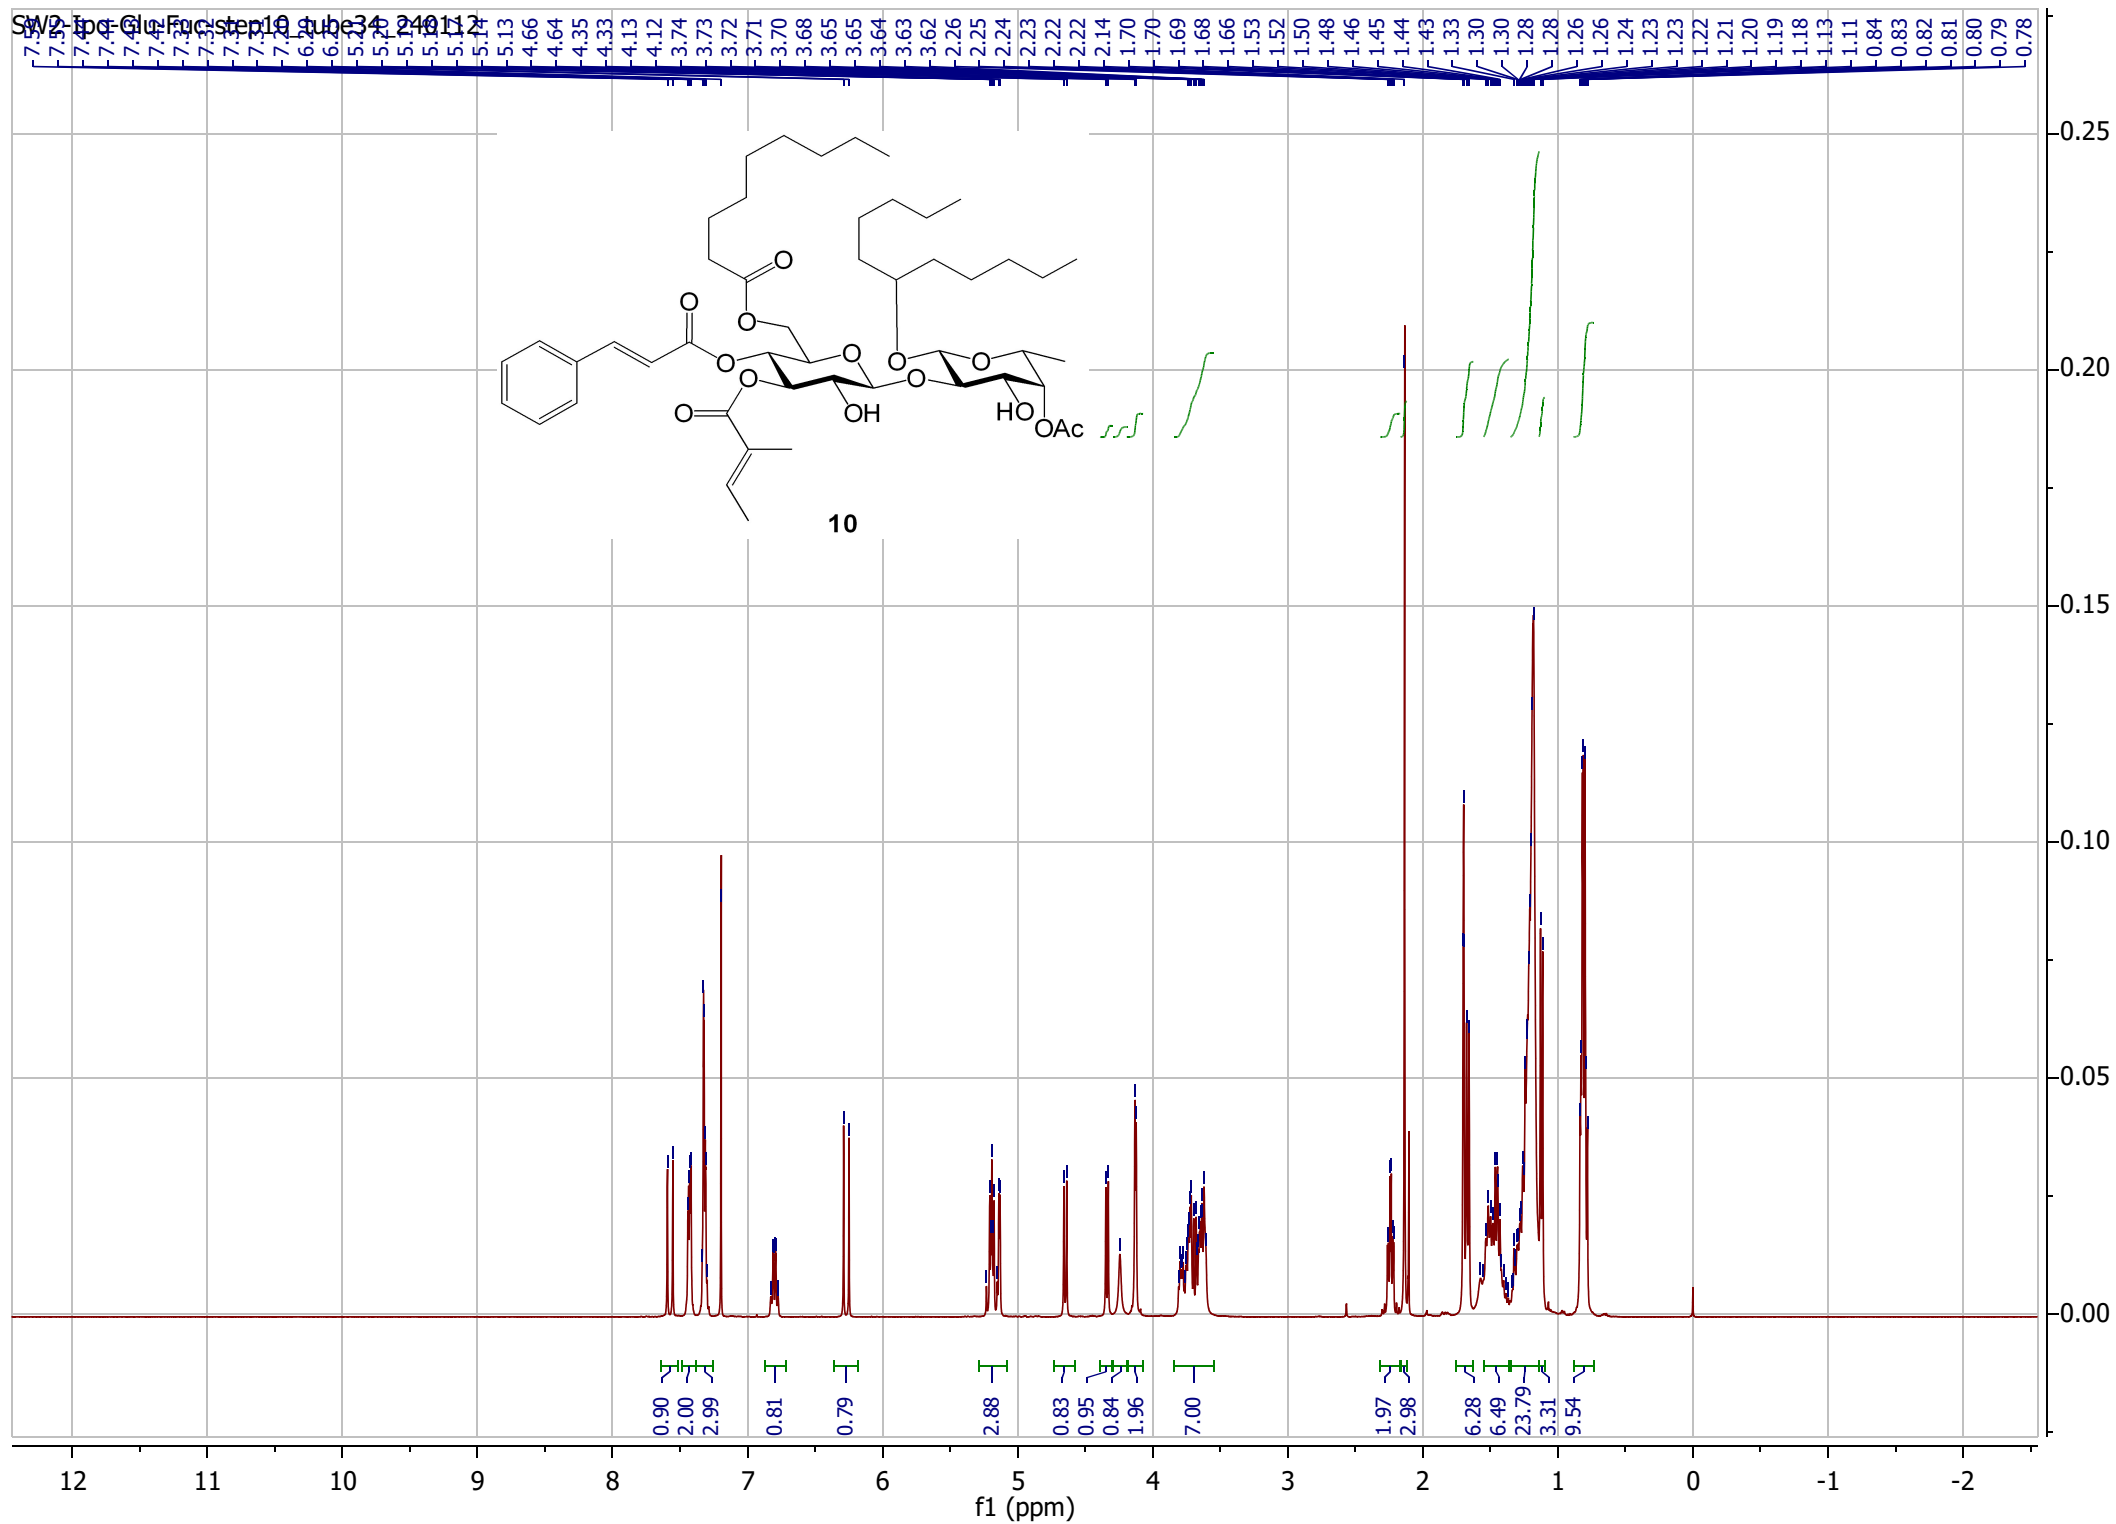

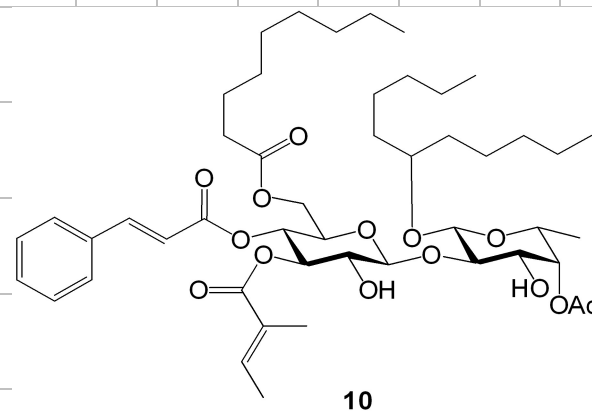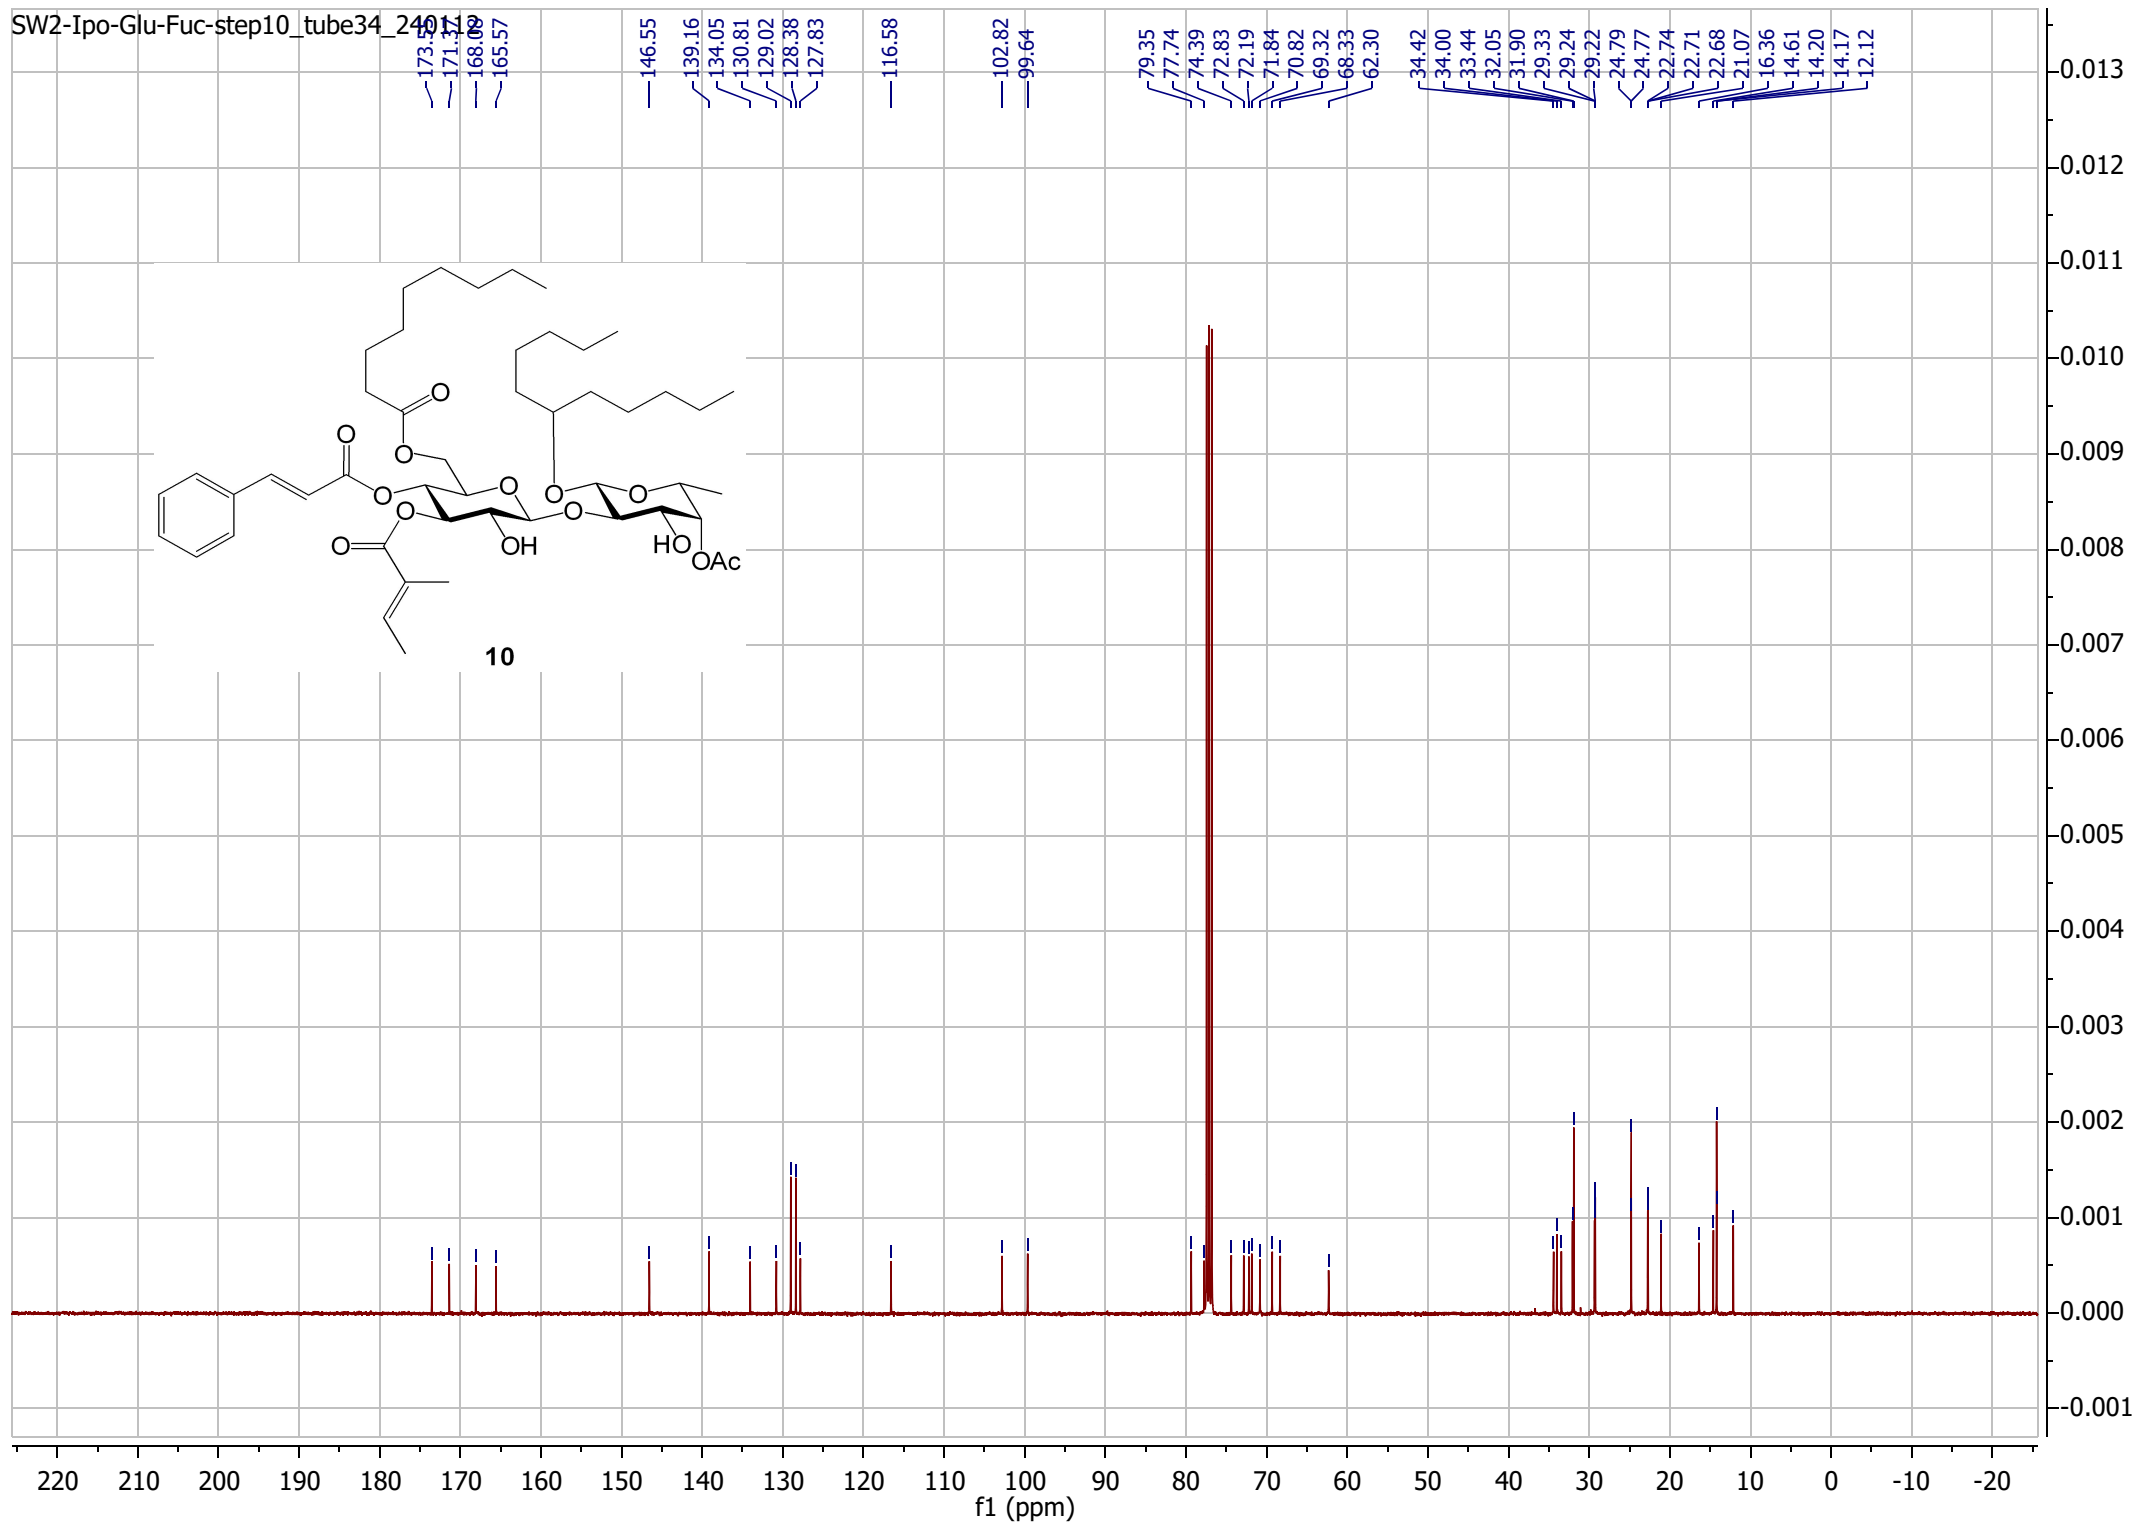

SW2-Ipo-Glu-Fuc-step10\_tube34\_240112

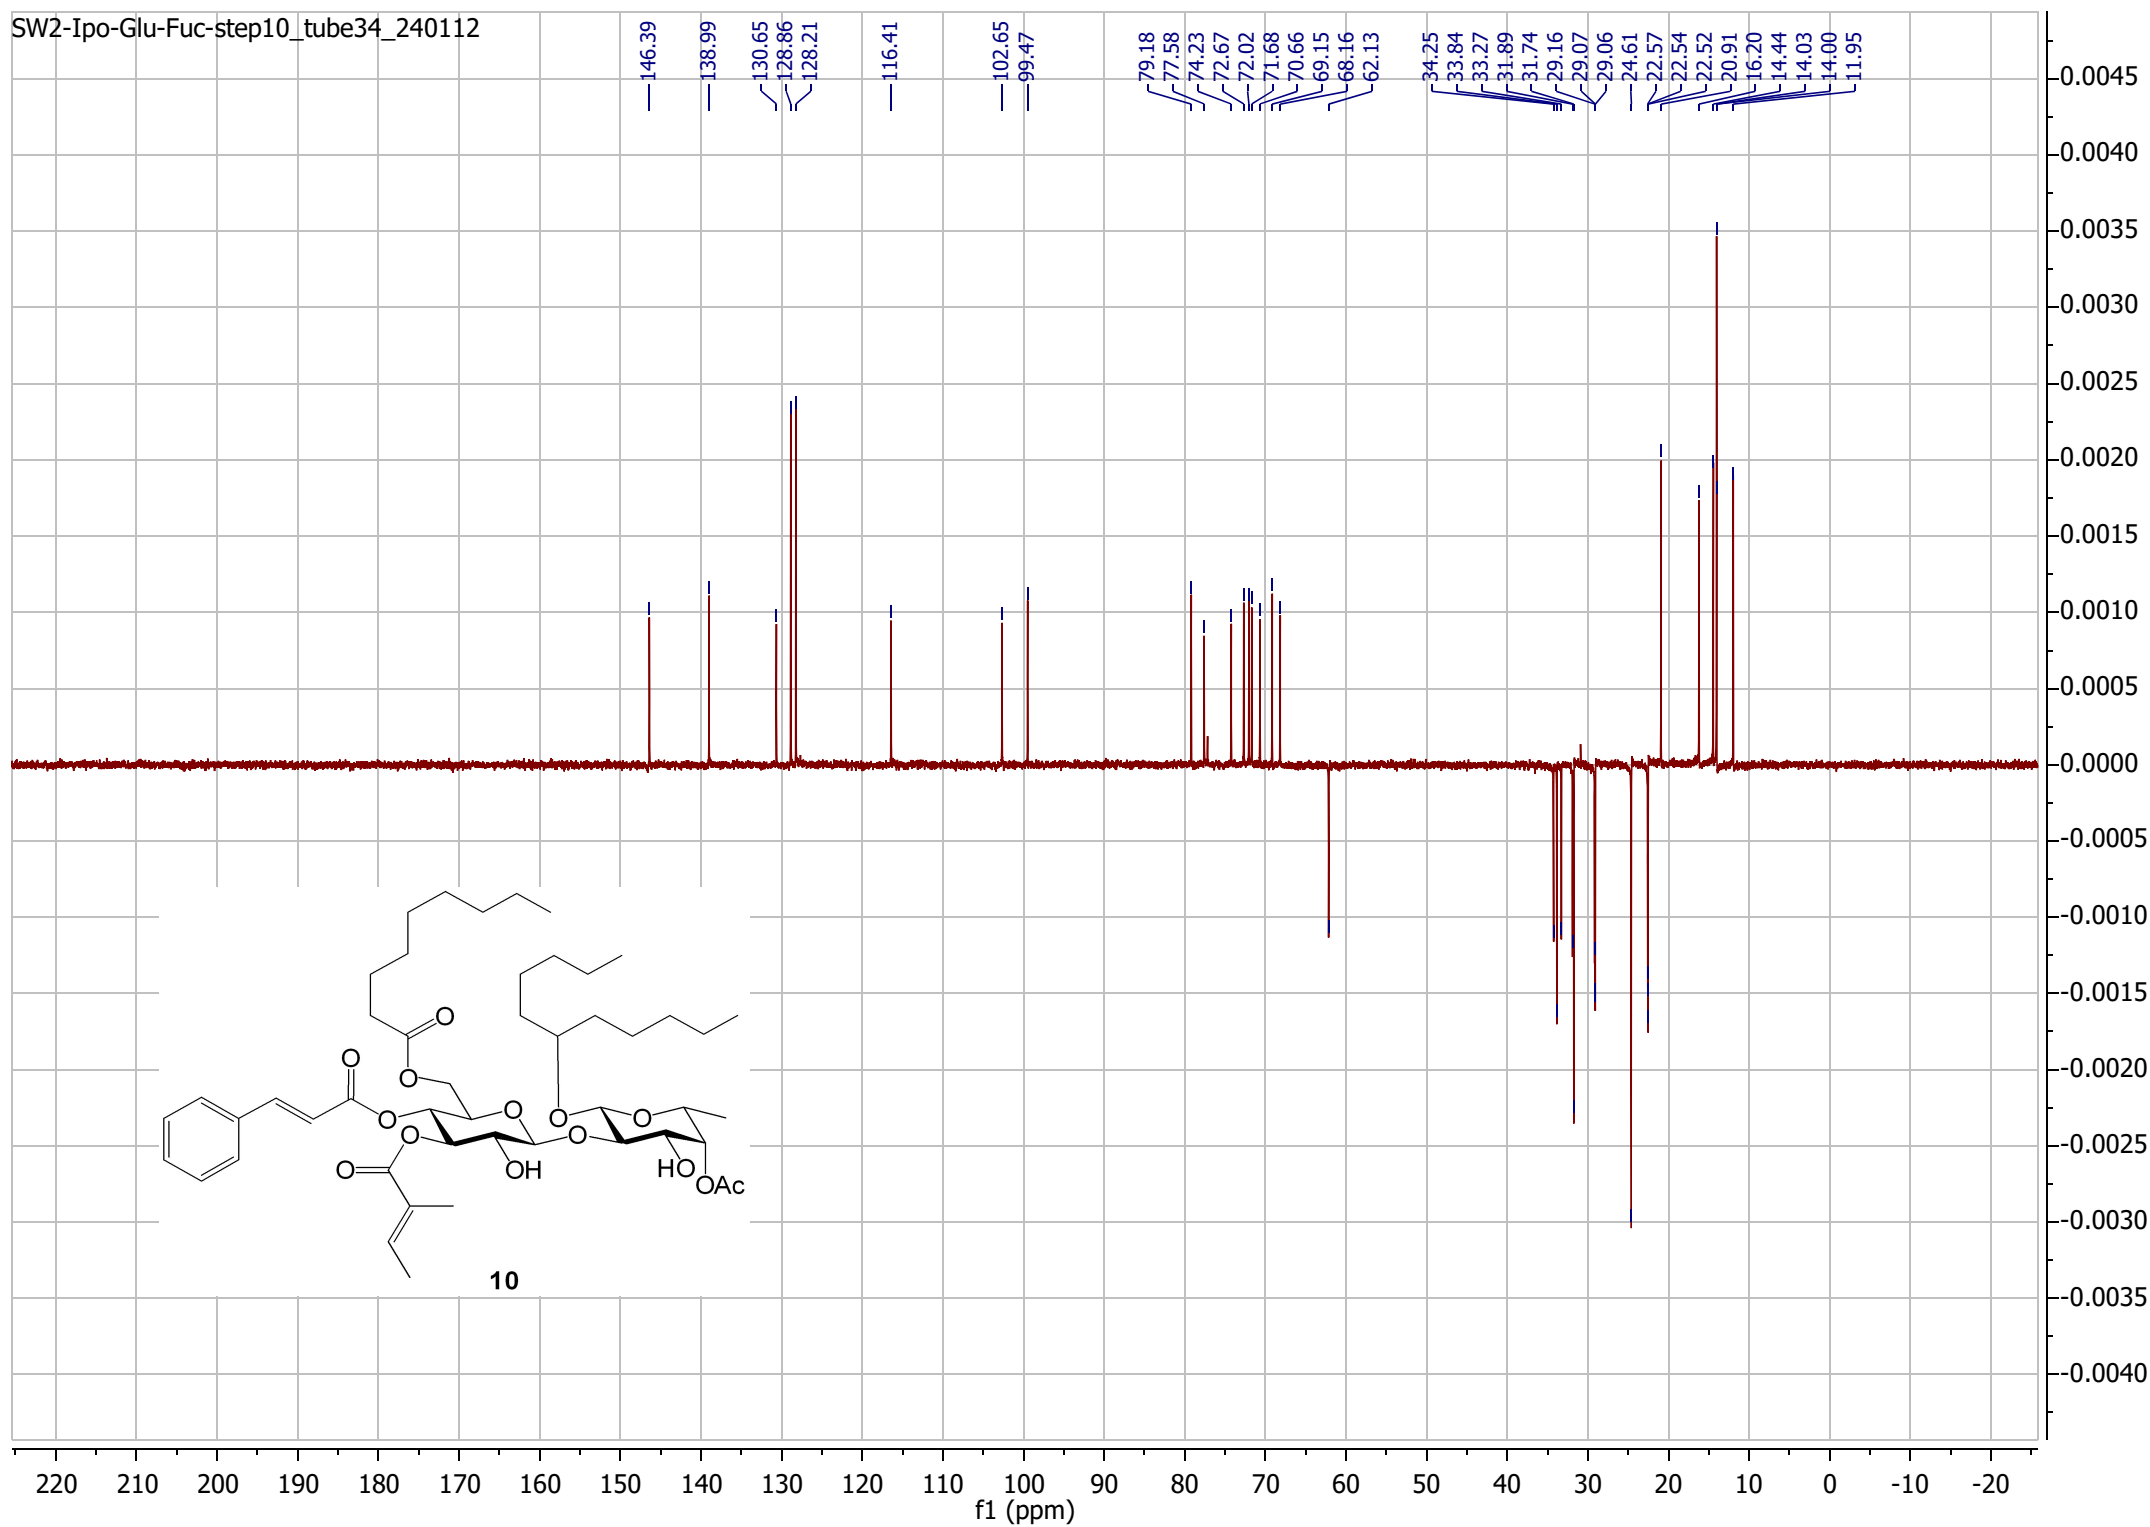

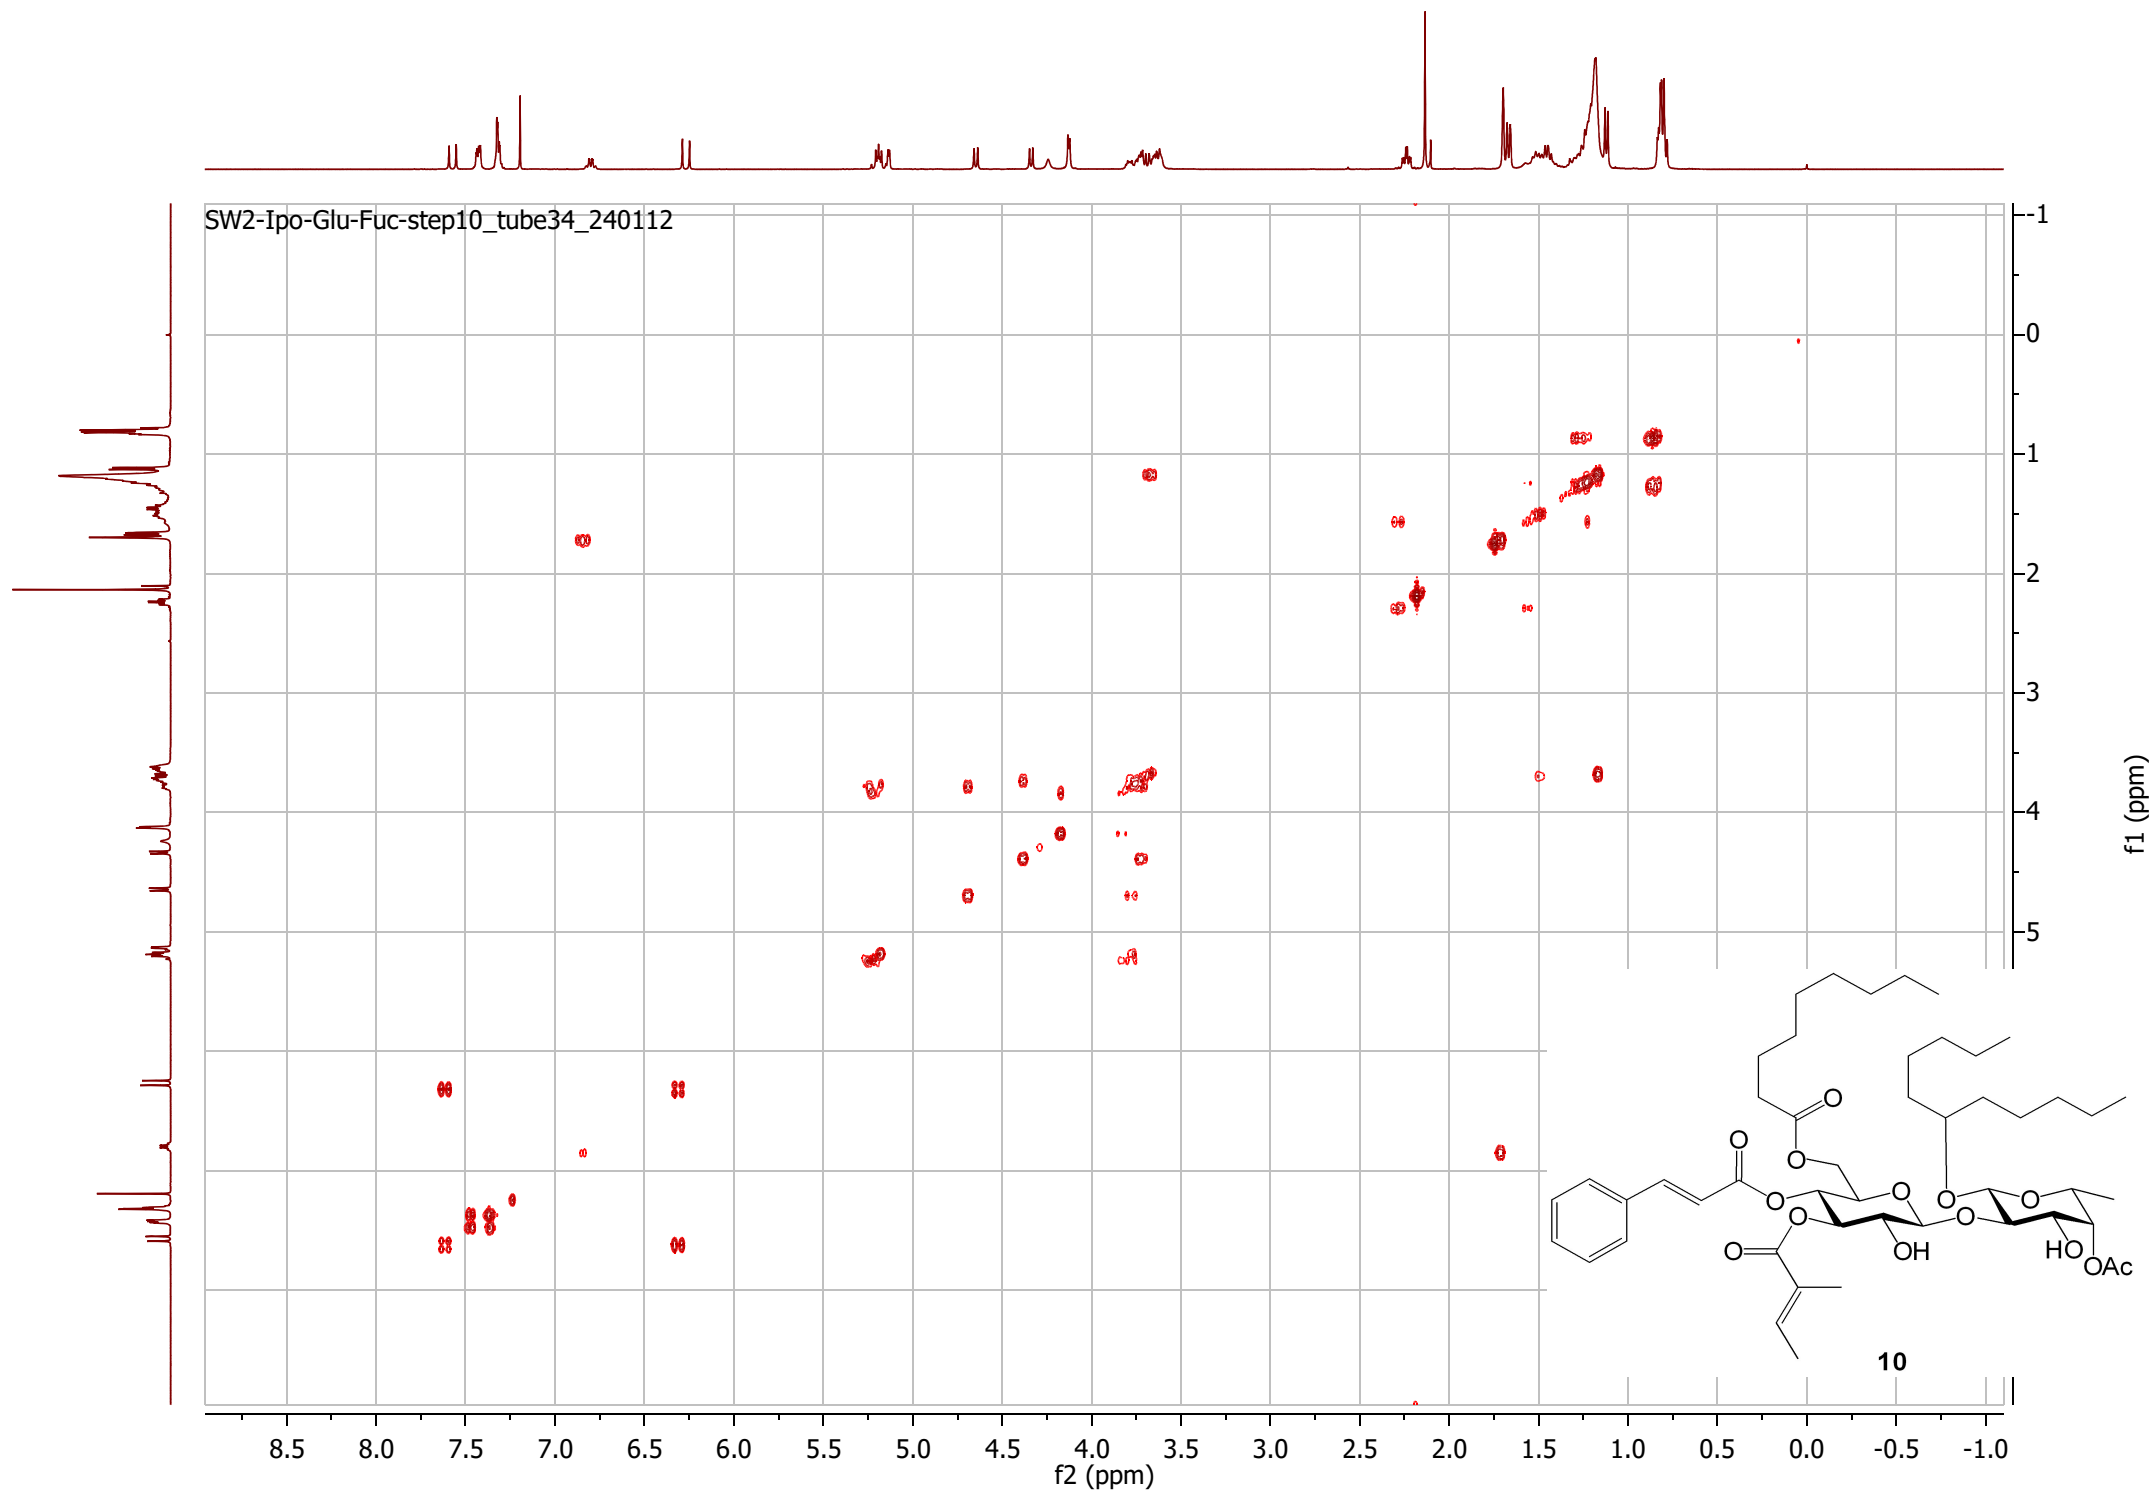



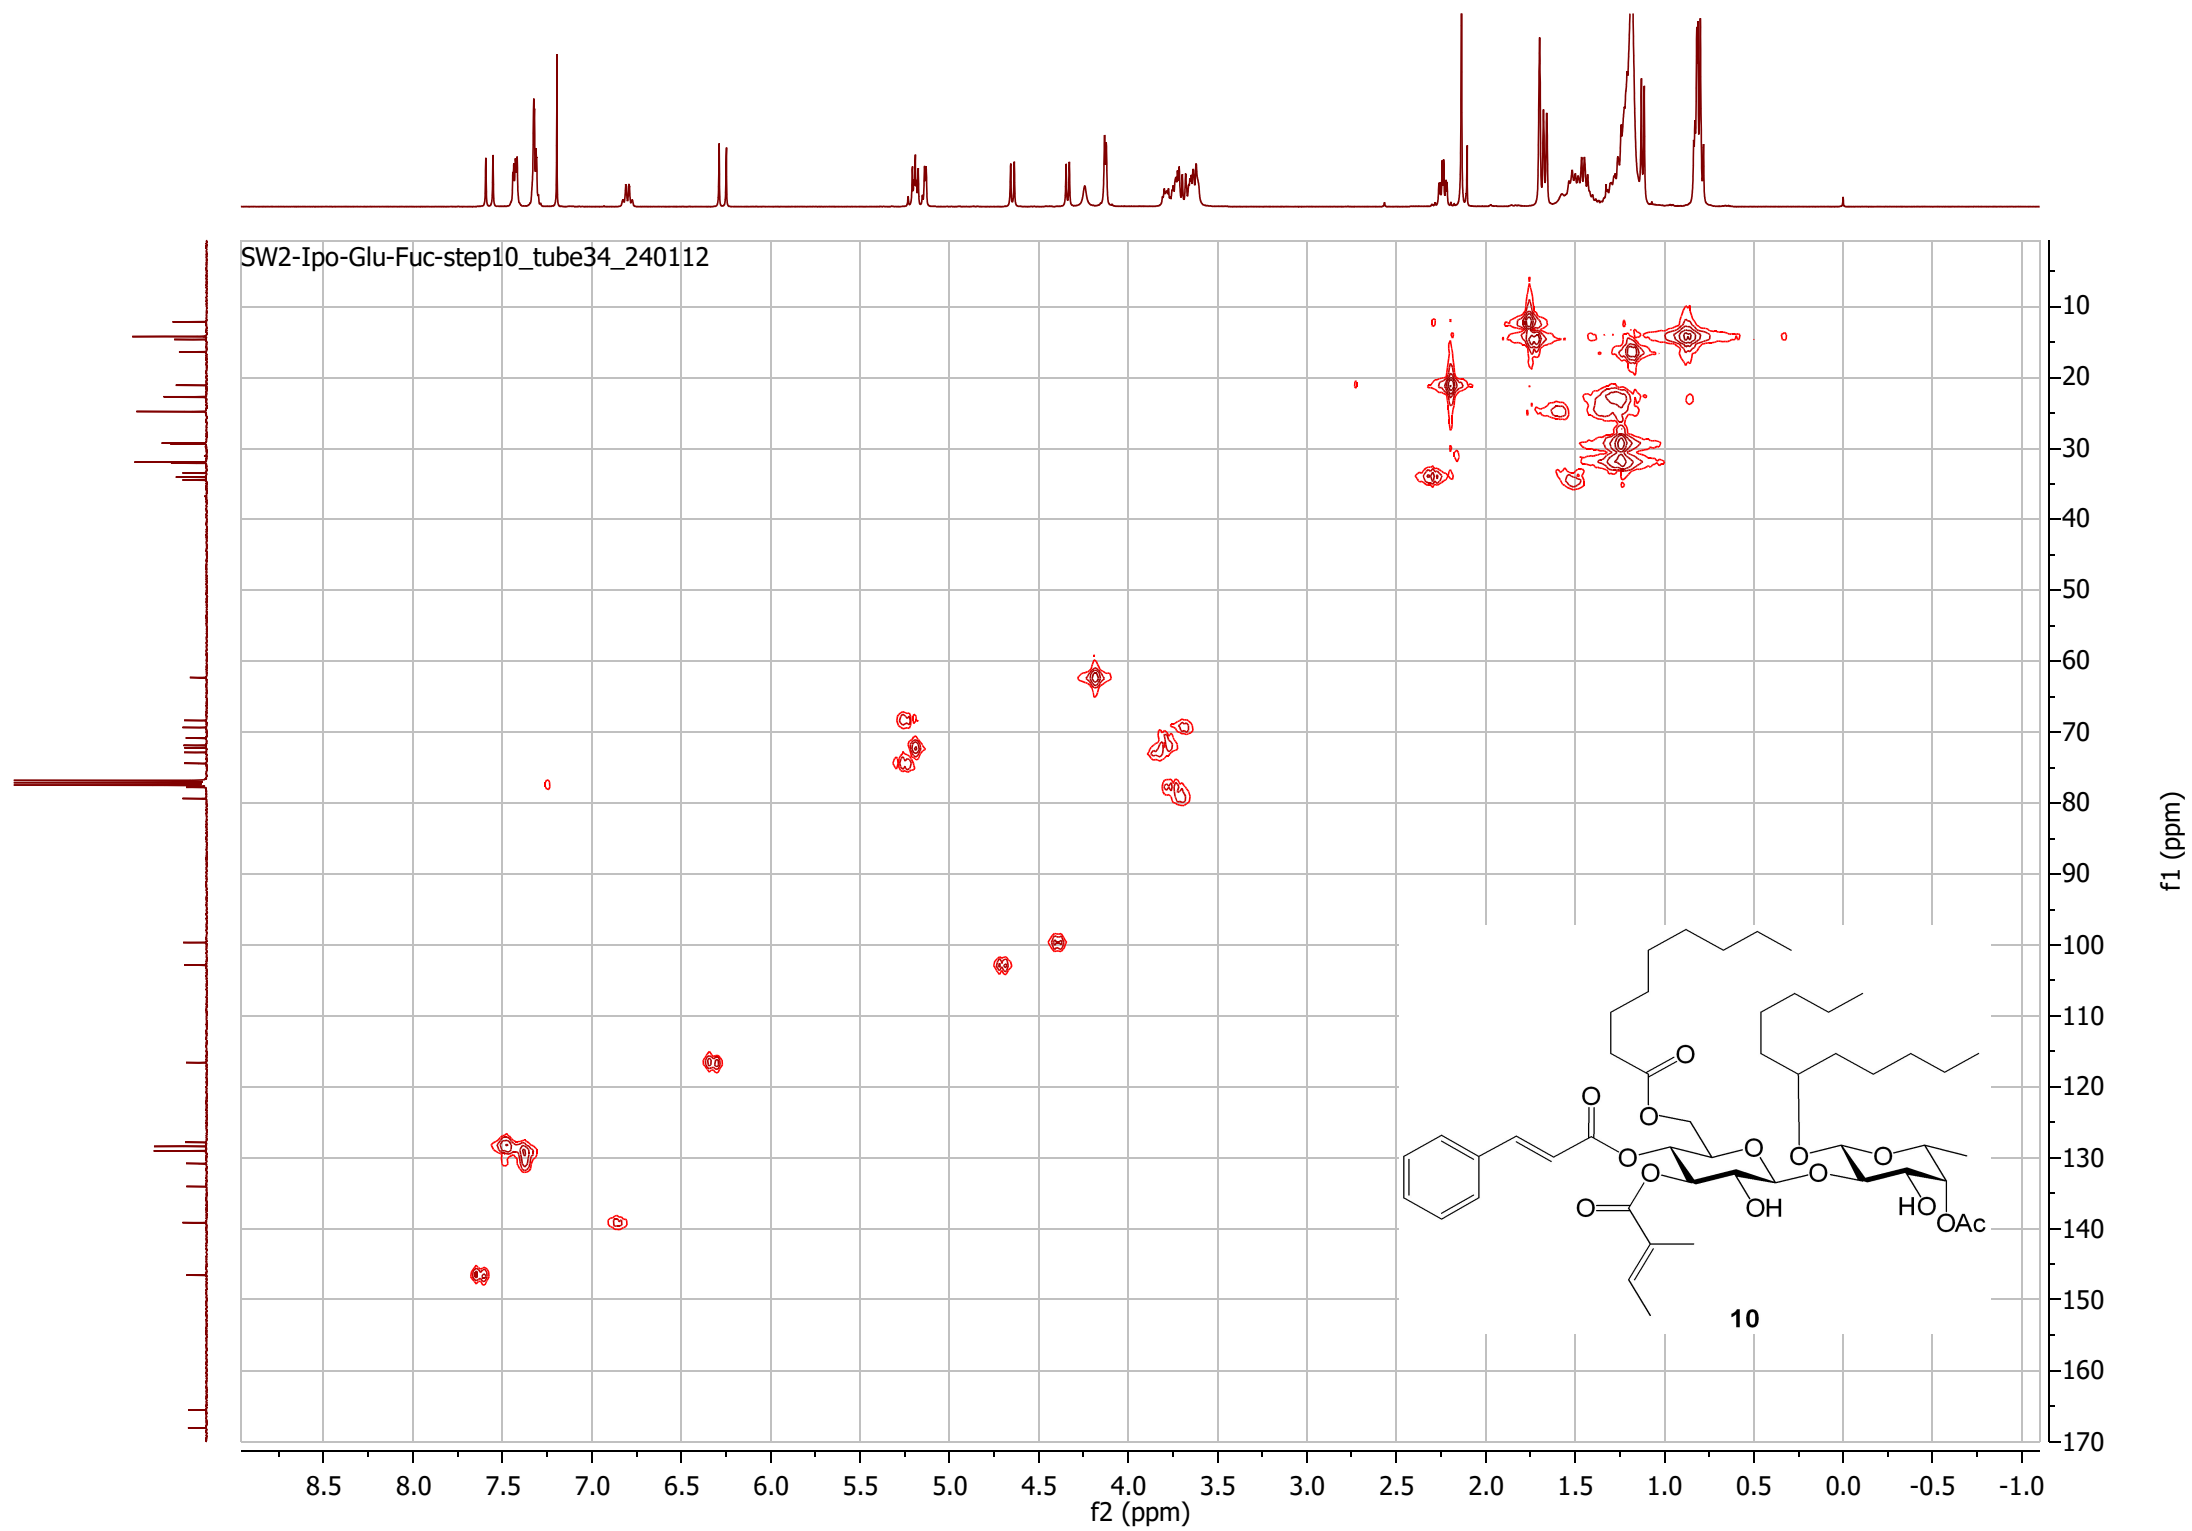

SW2-Ipo-Glu-Fuc-step10\_tube34\_240112

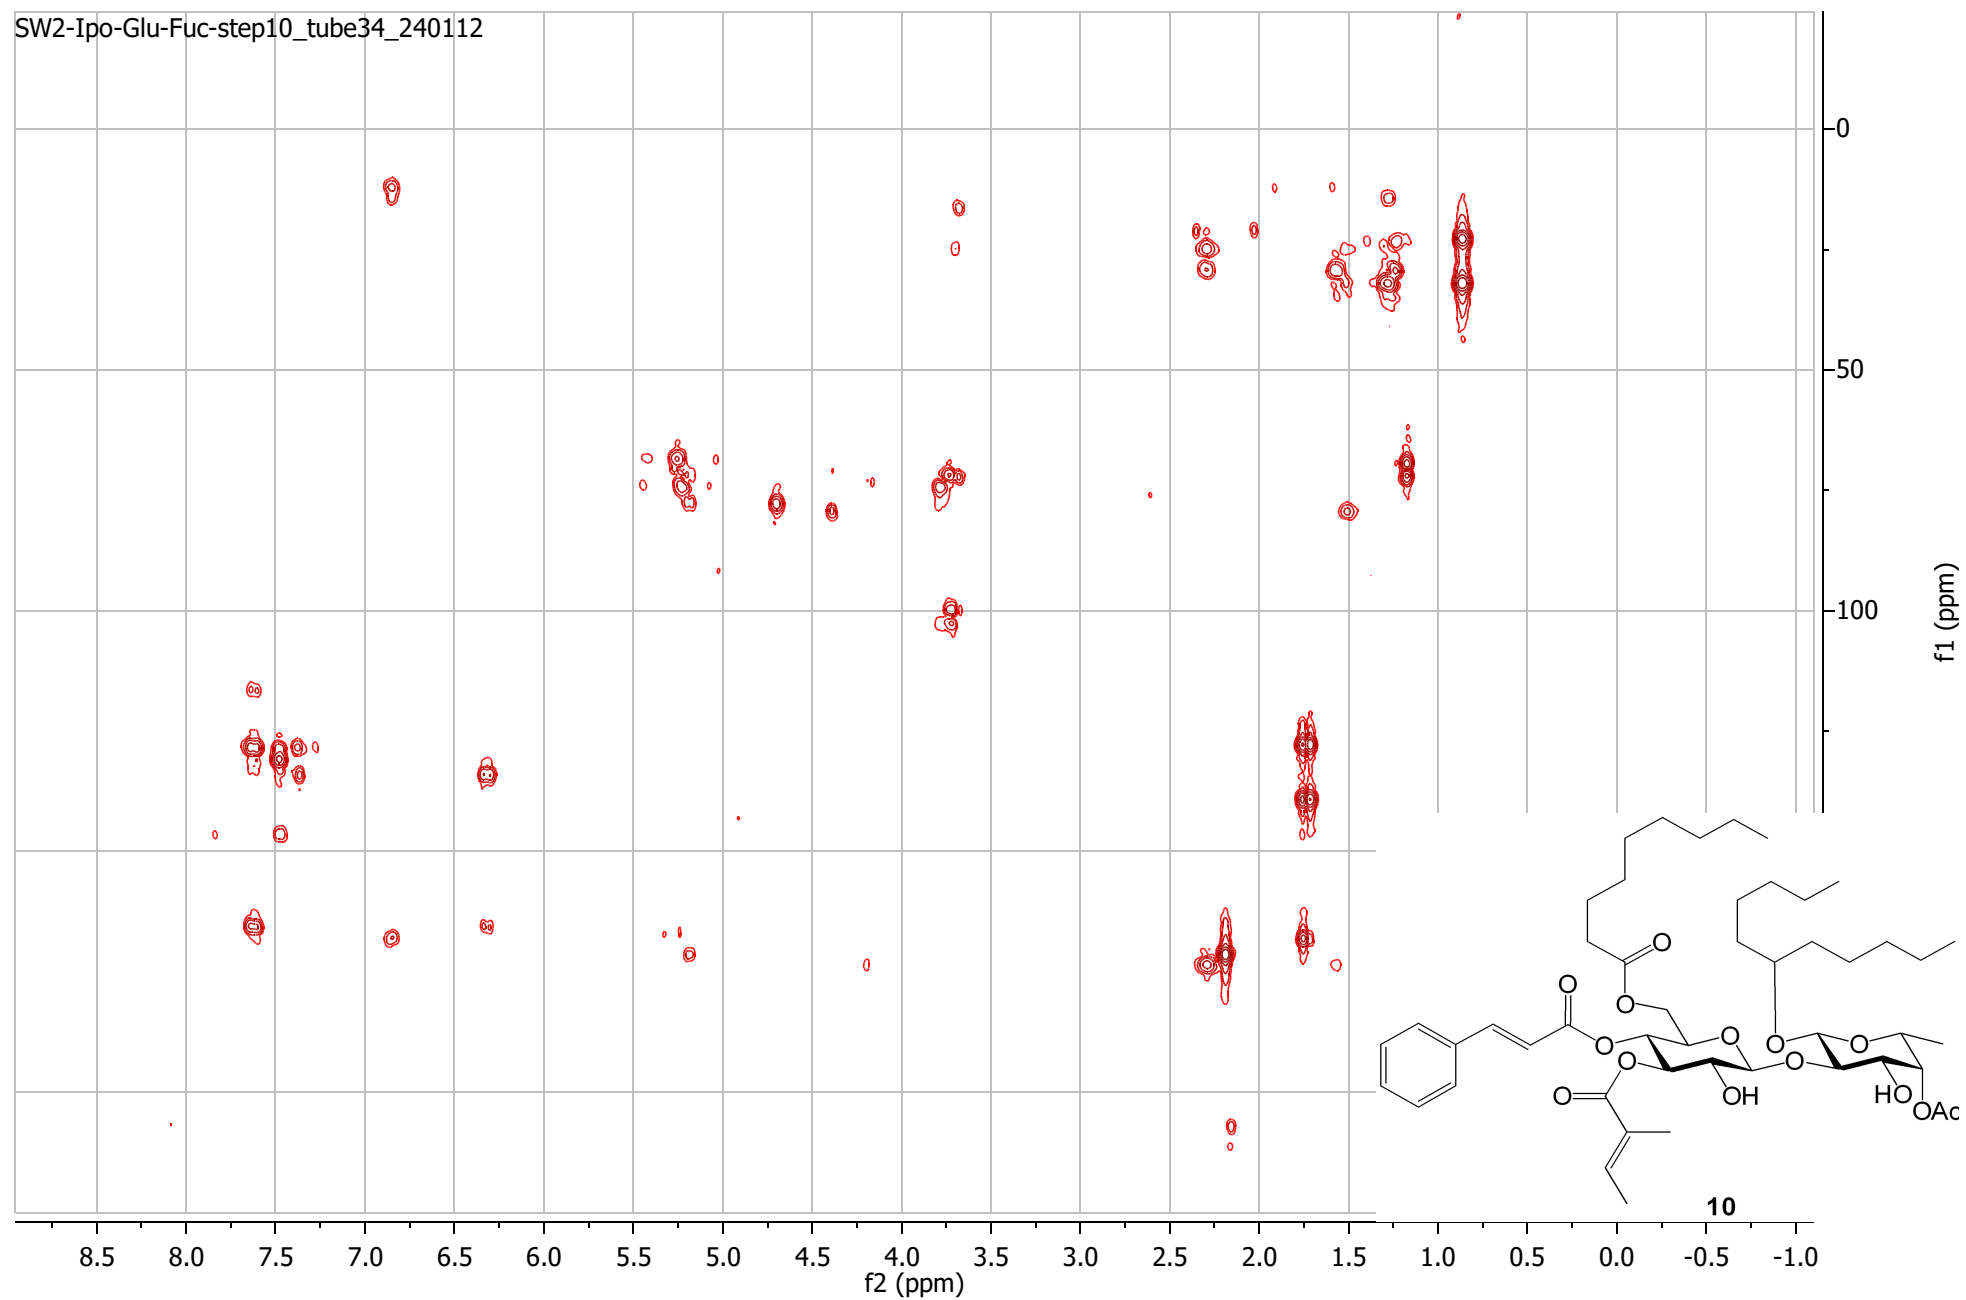

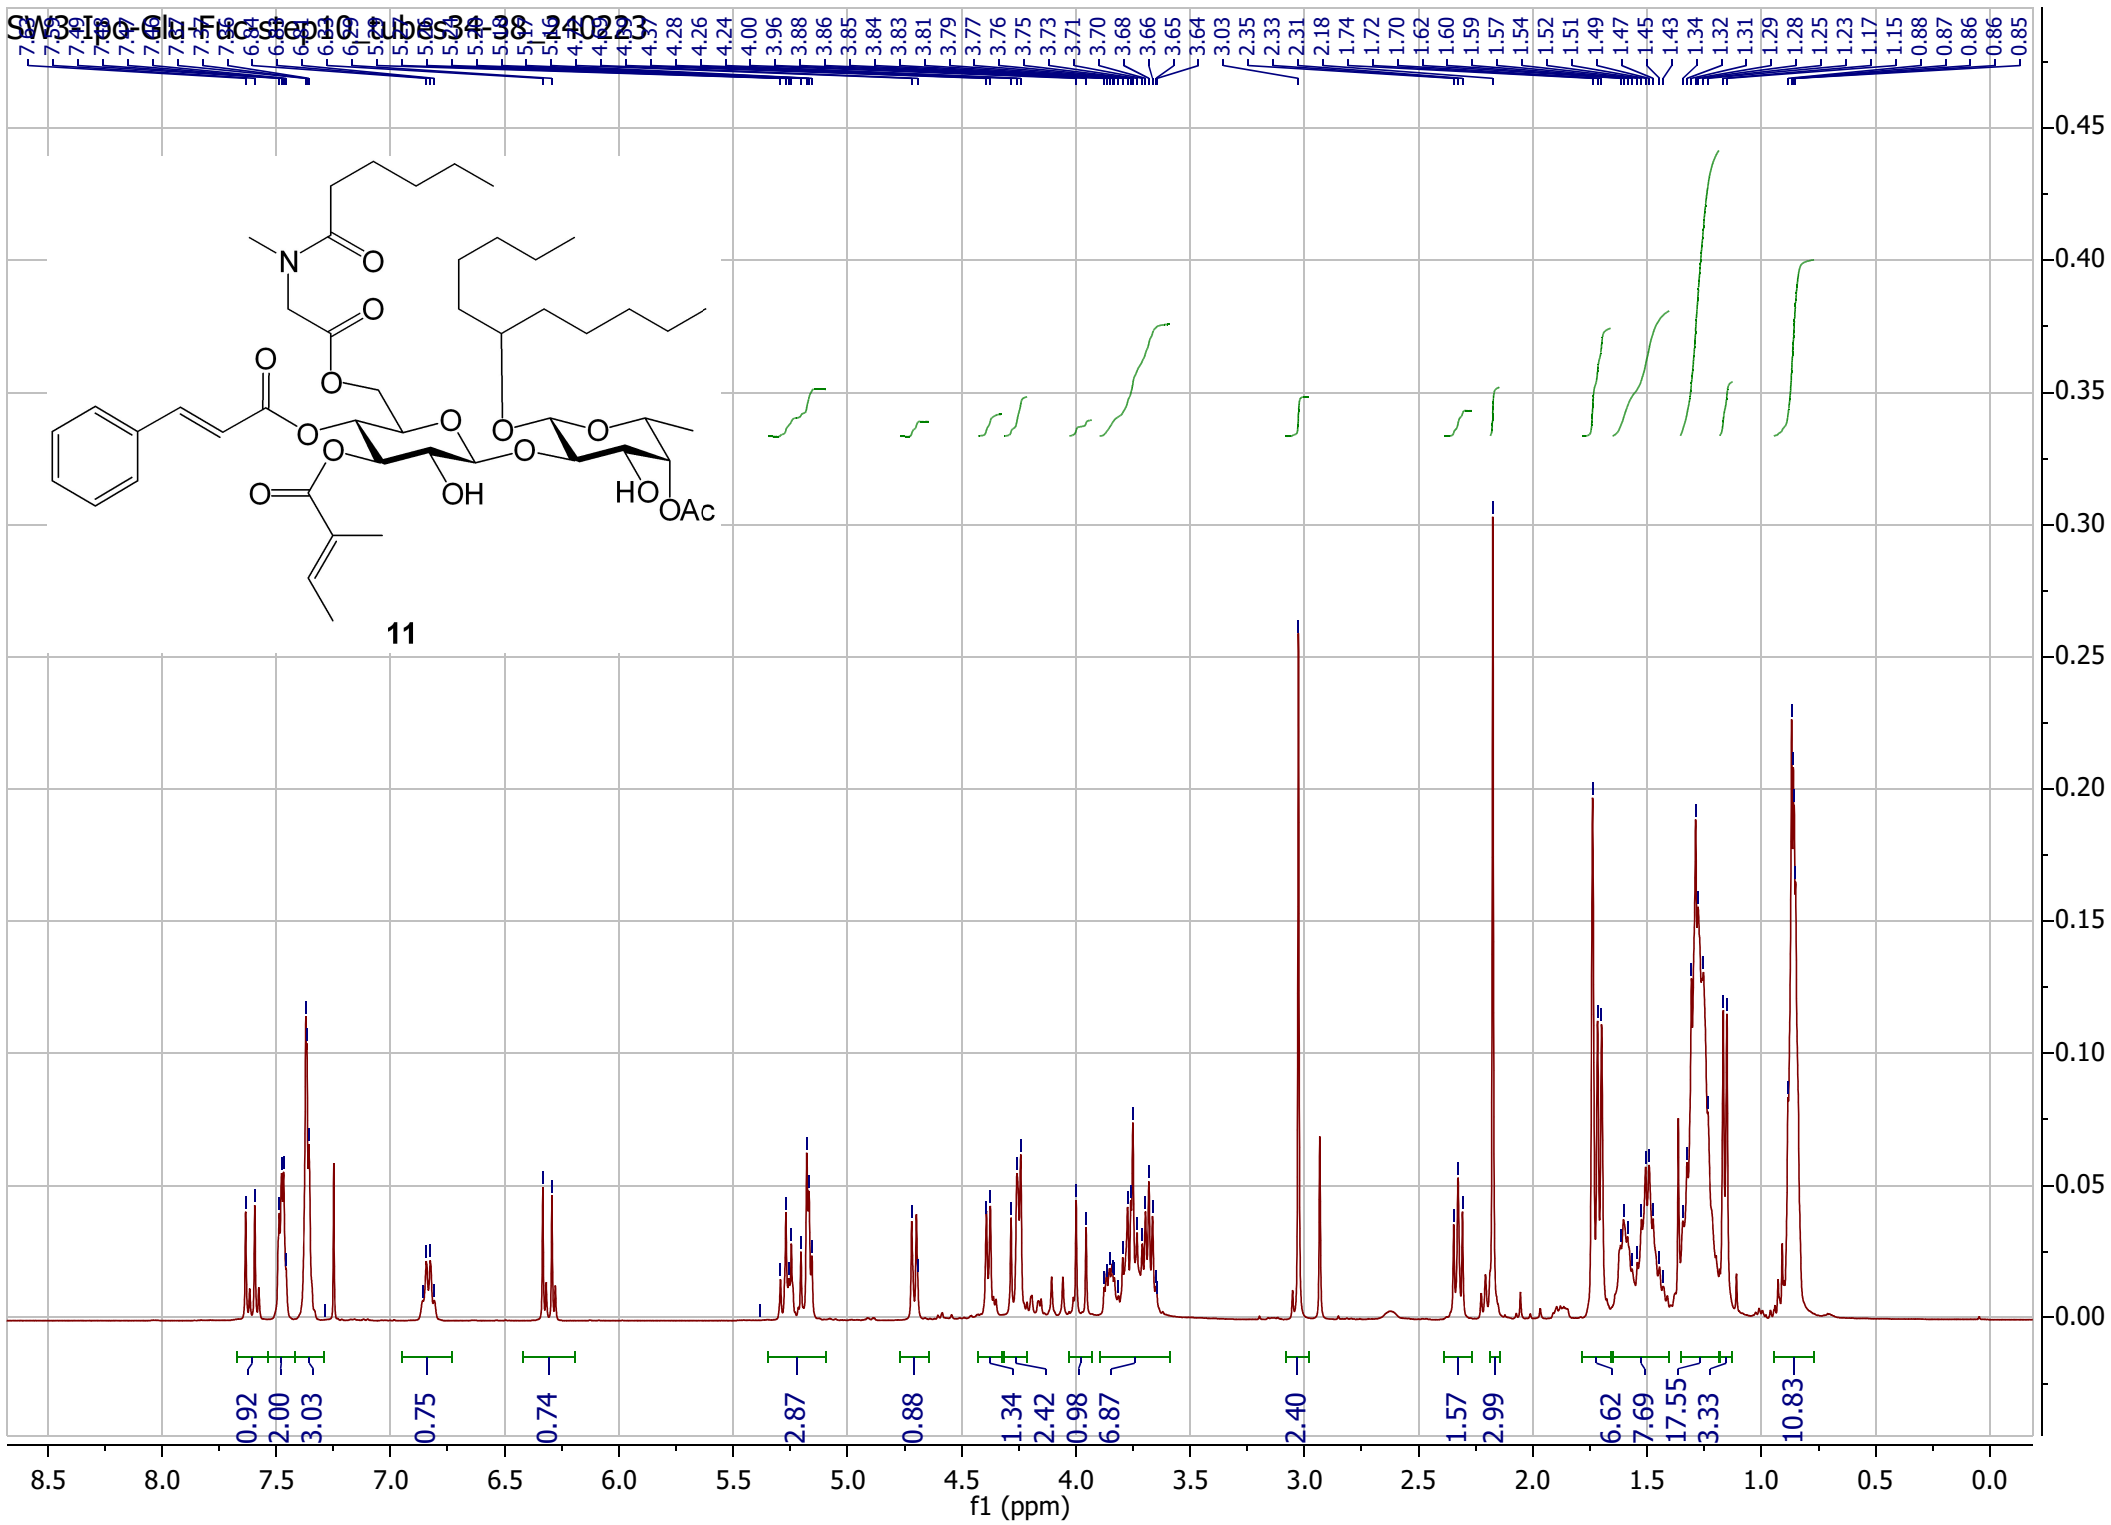

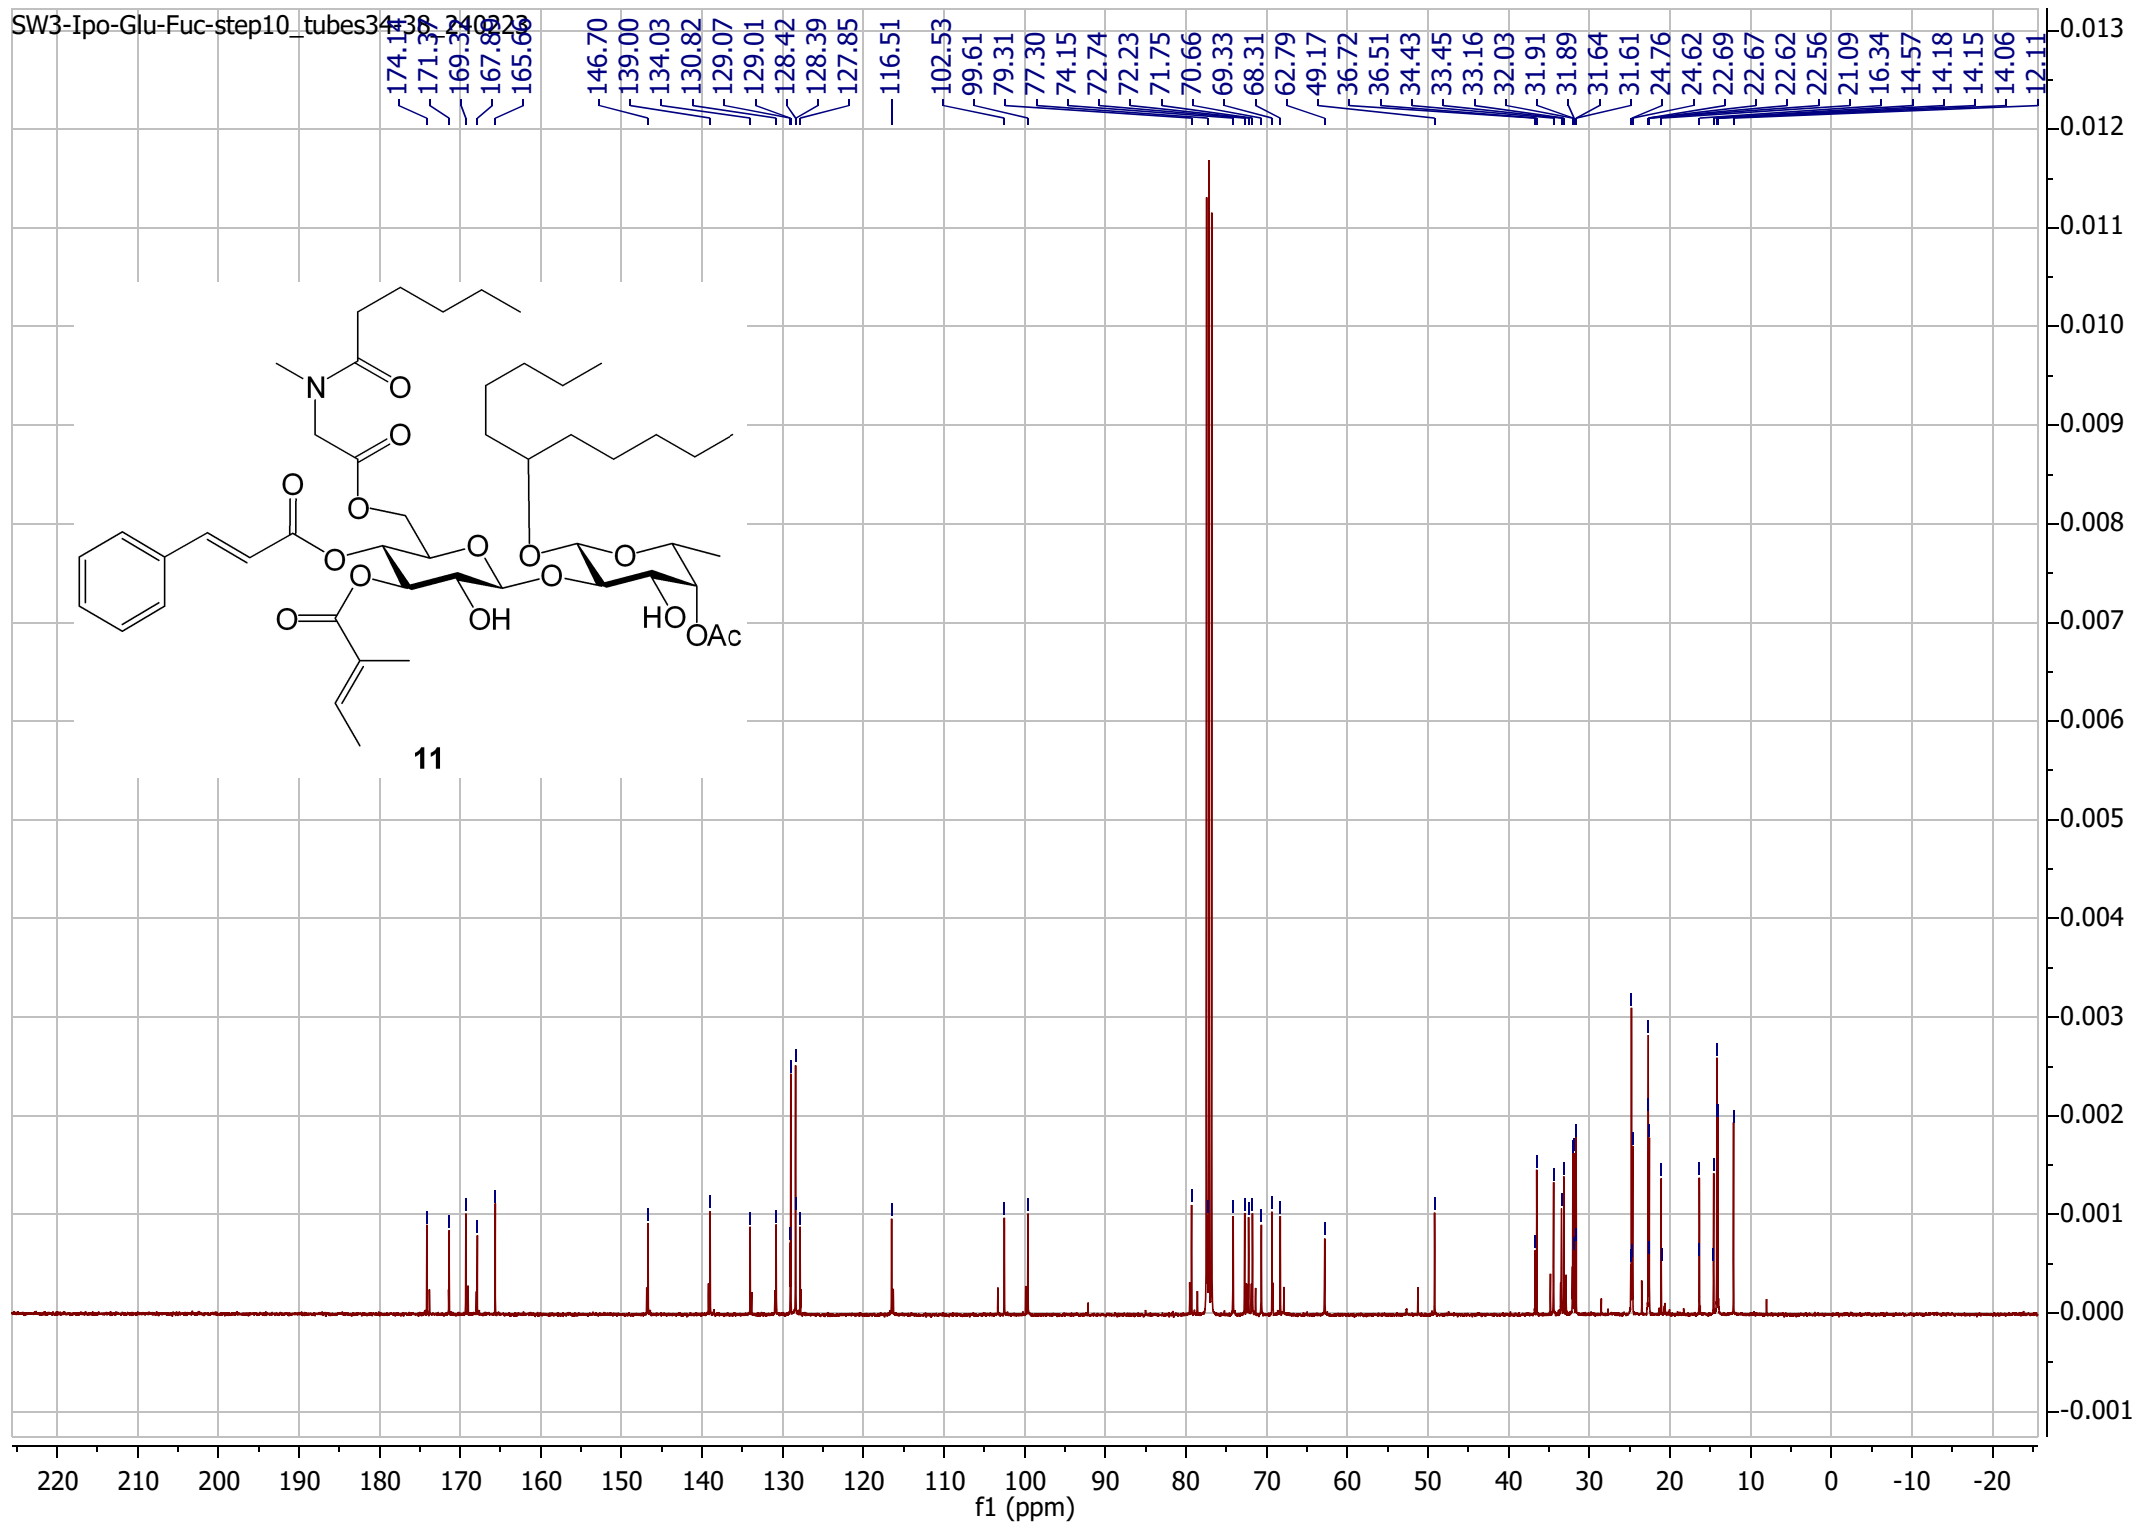

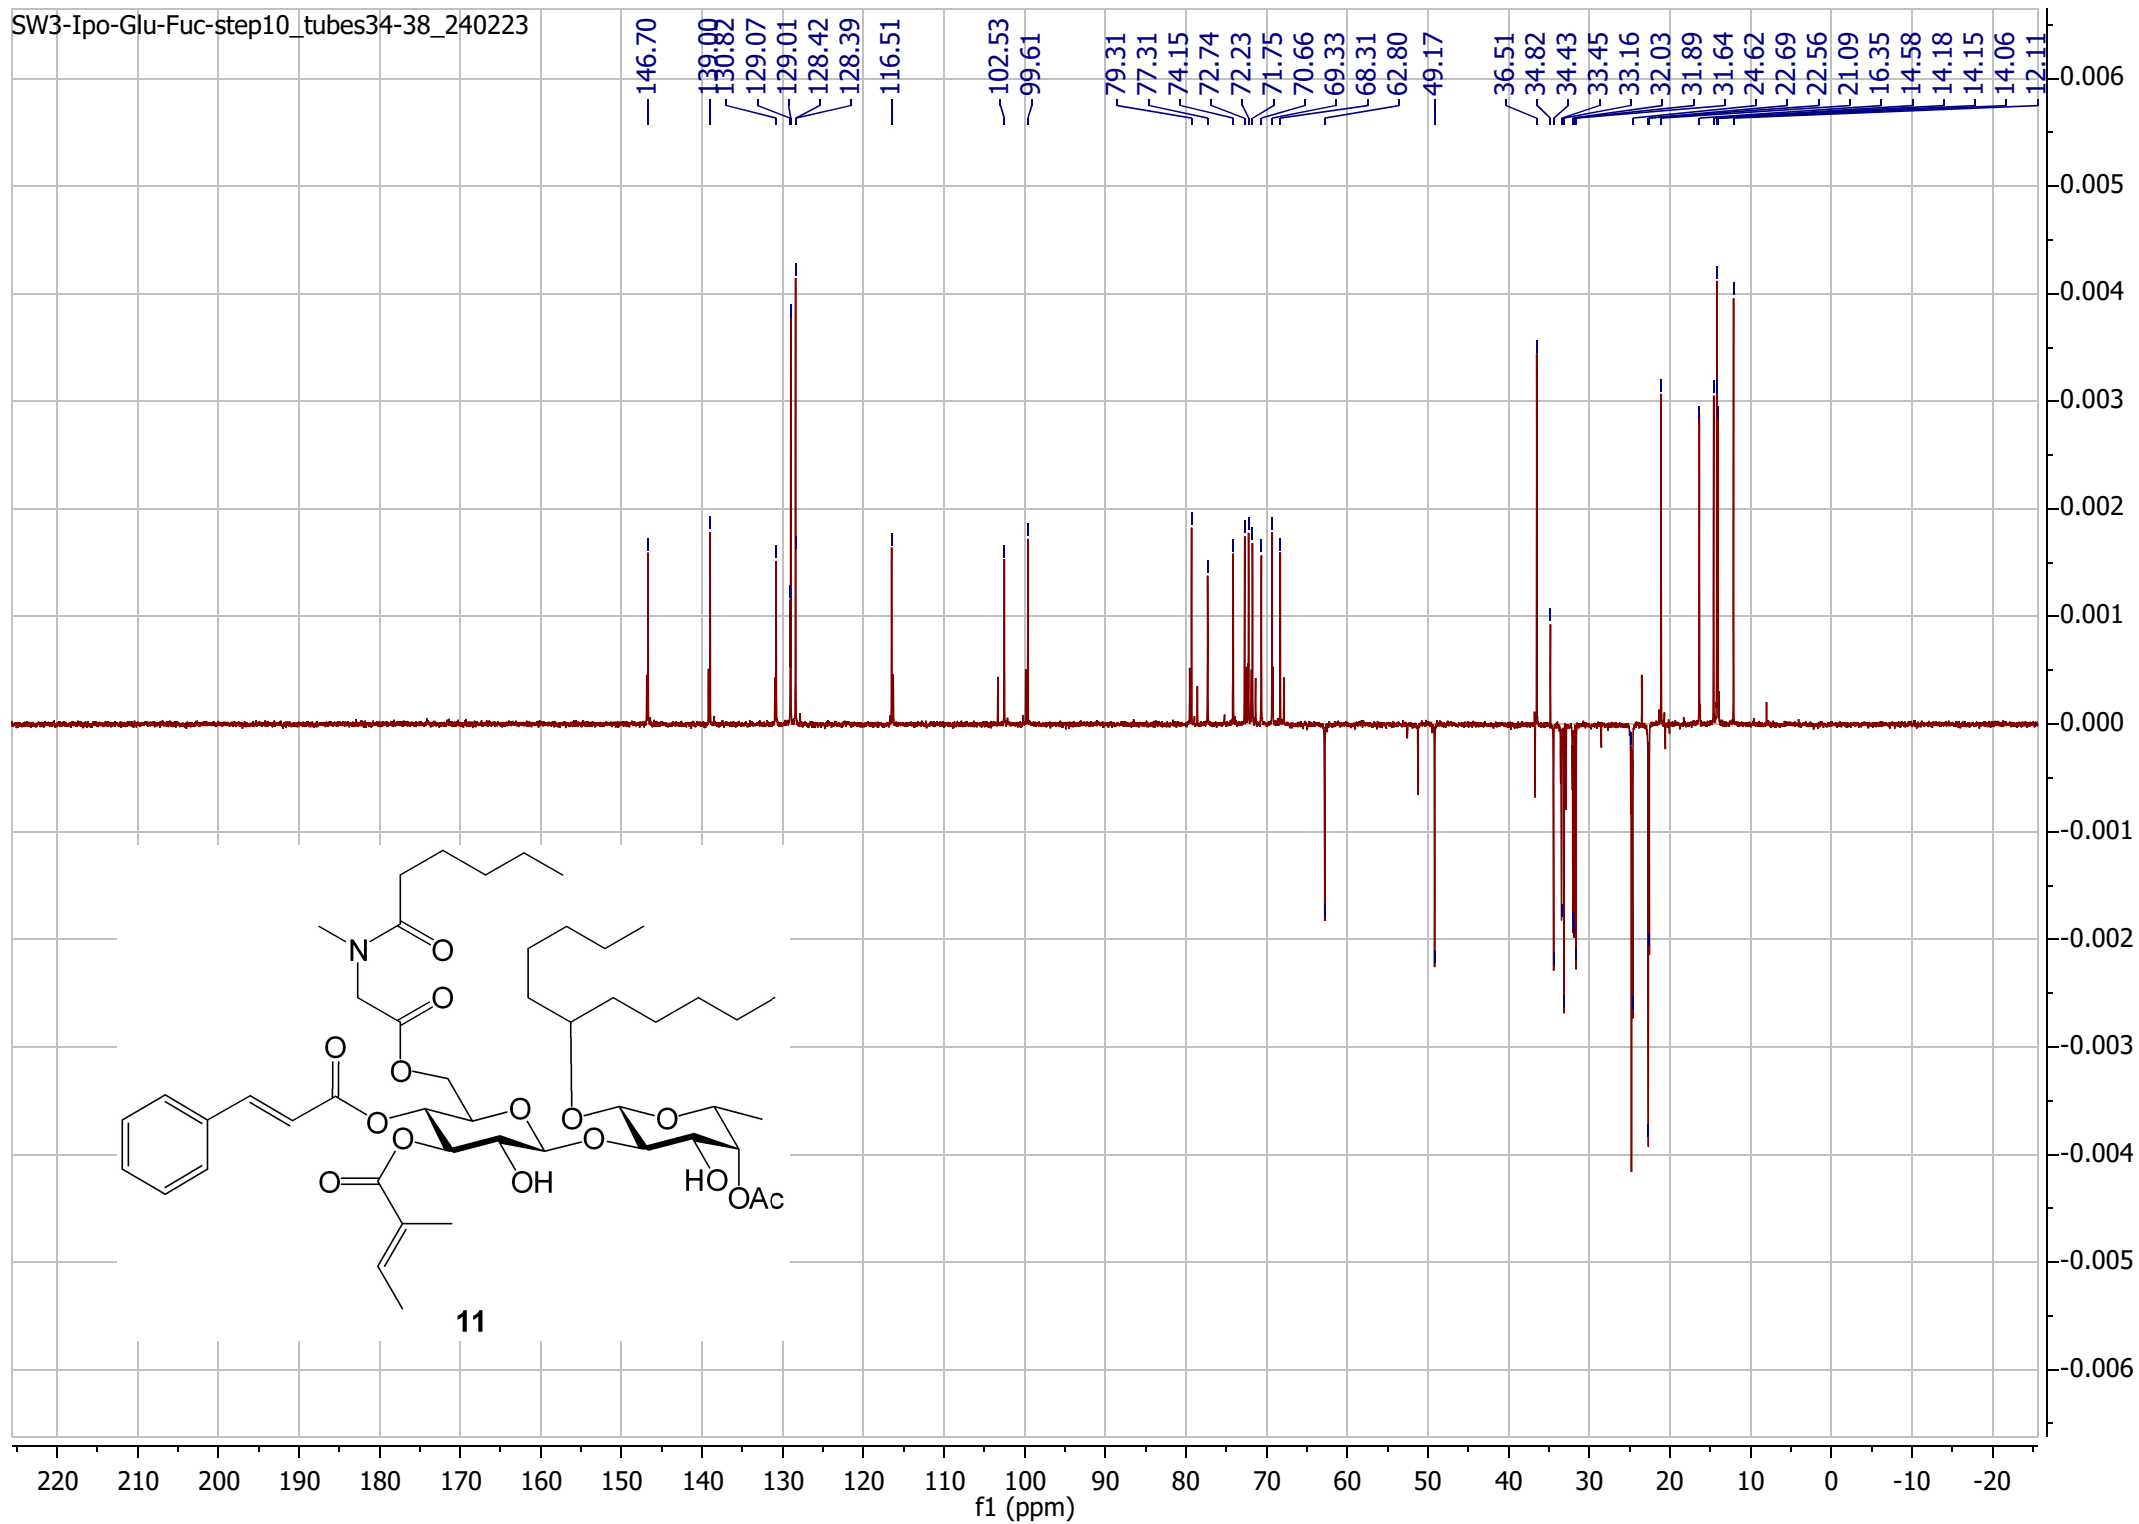

SW3-Ipo-Glu-Fuc-step10\_tubes34-38\_240223

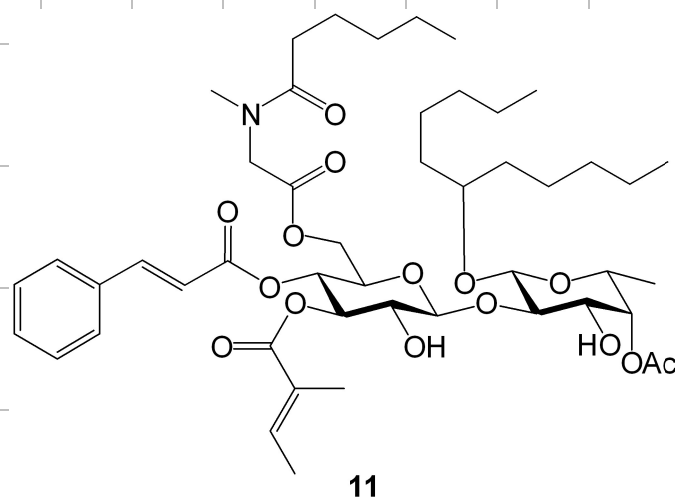

11

f1 (ppm)

f2 (ppm)

SW3-Ipo-Glu-Fuc-step10\_tubes34-38\_240223

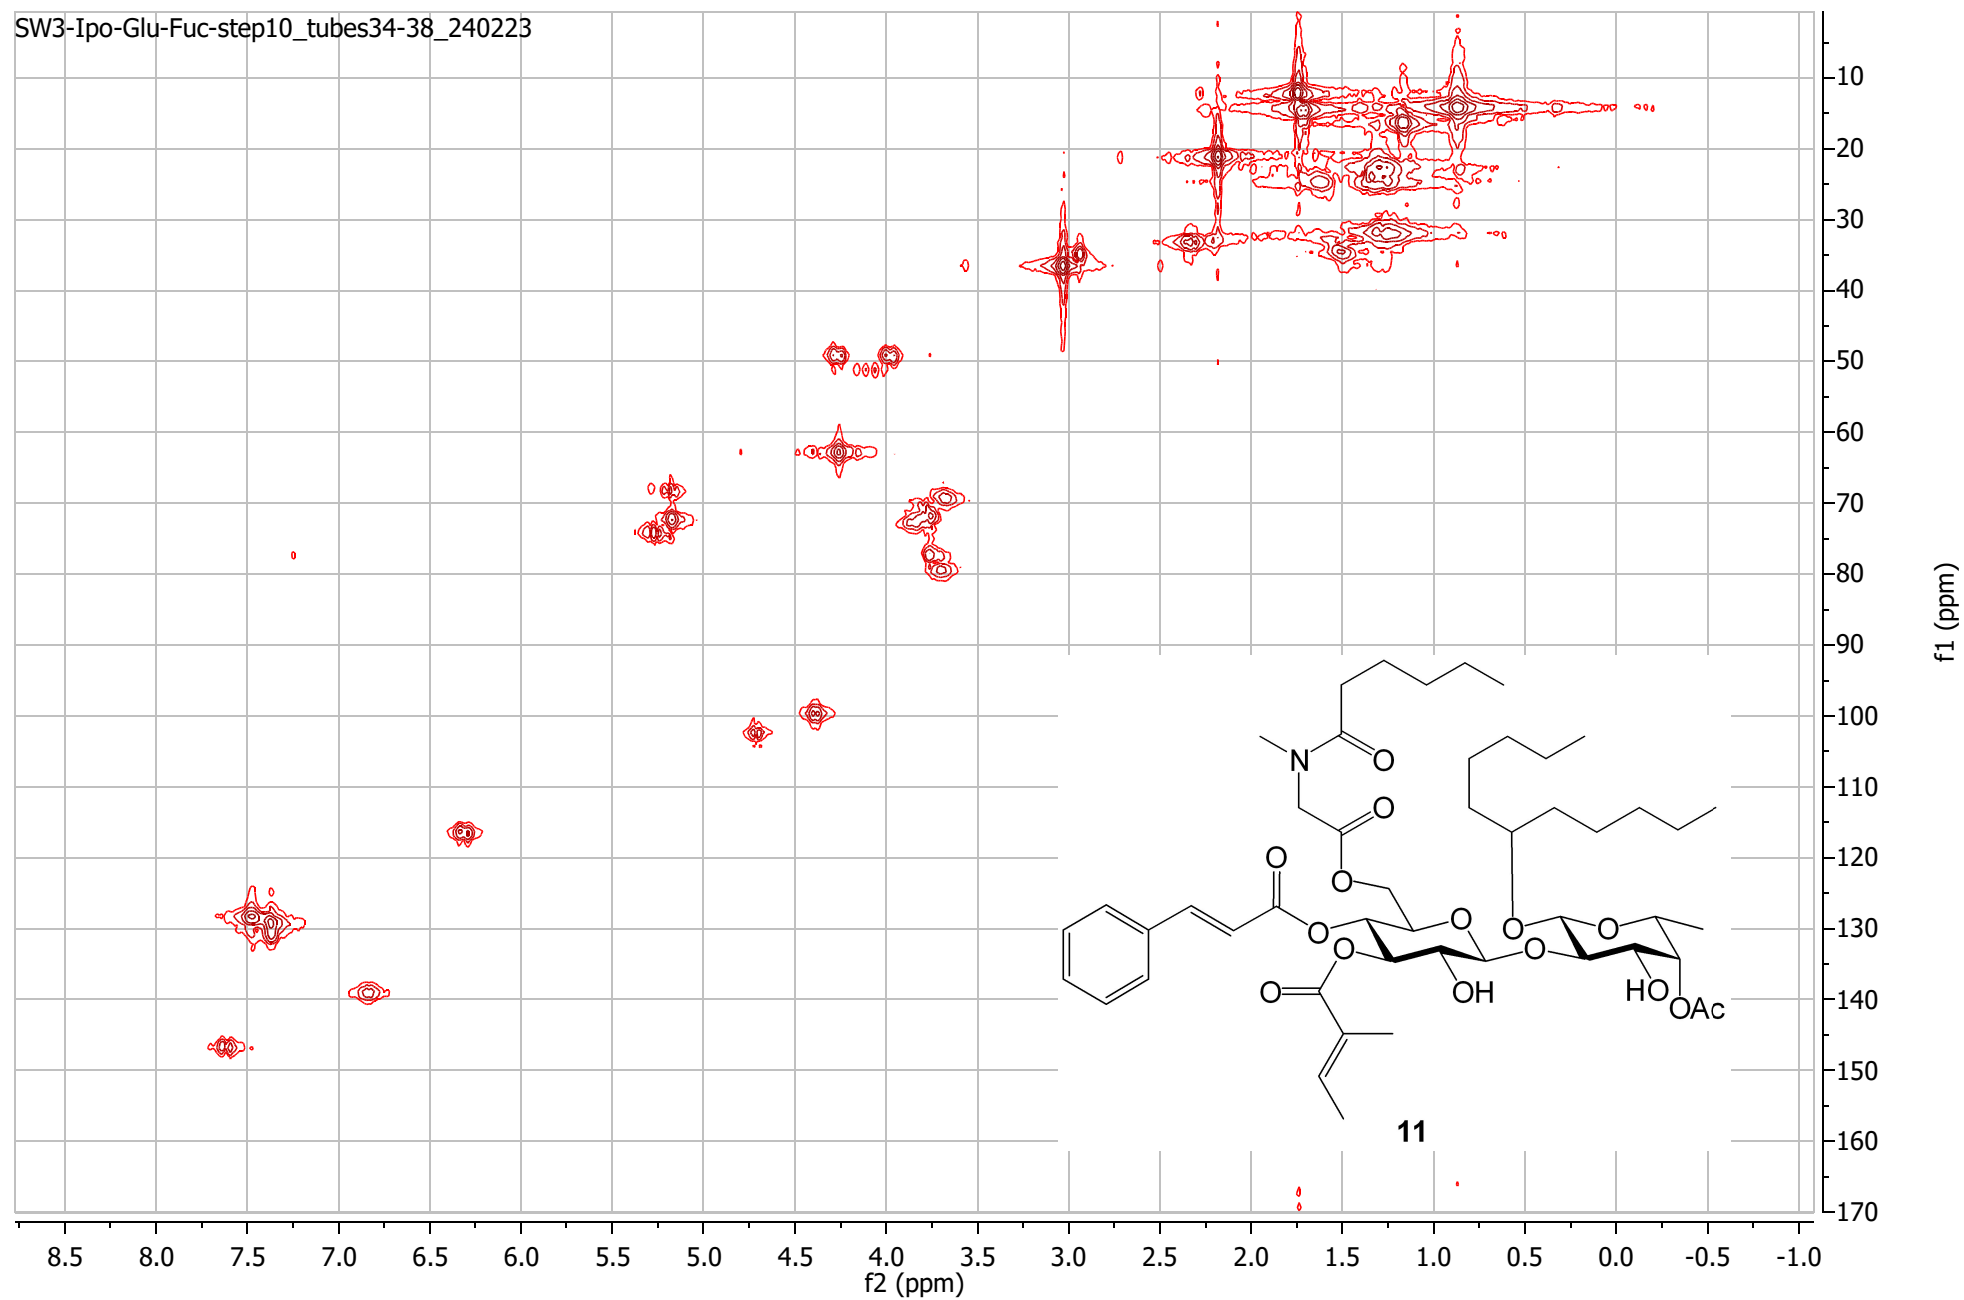

SW3-Ipo-Glu-Fuc-step10\_tubes34-38\_240223

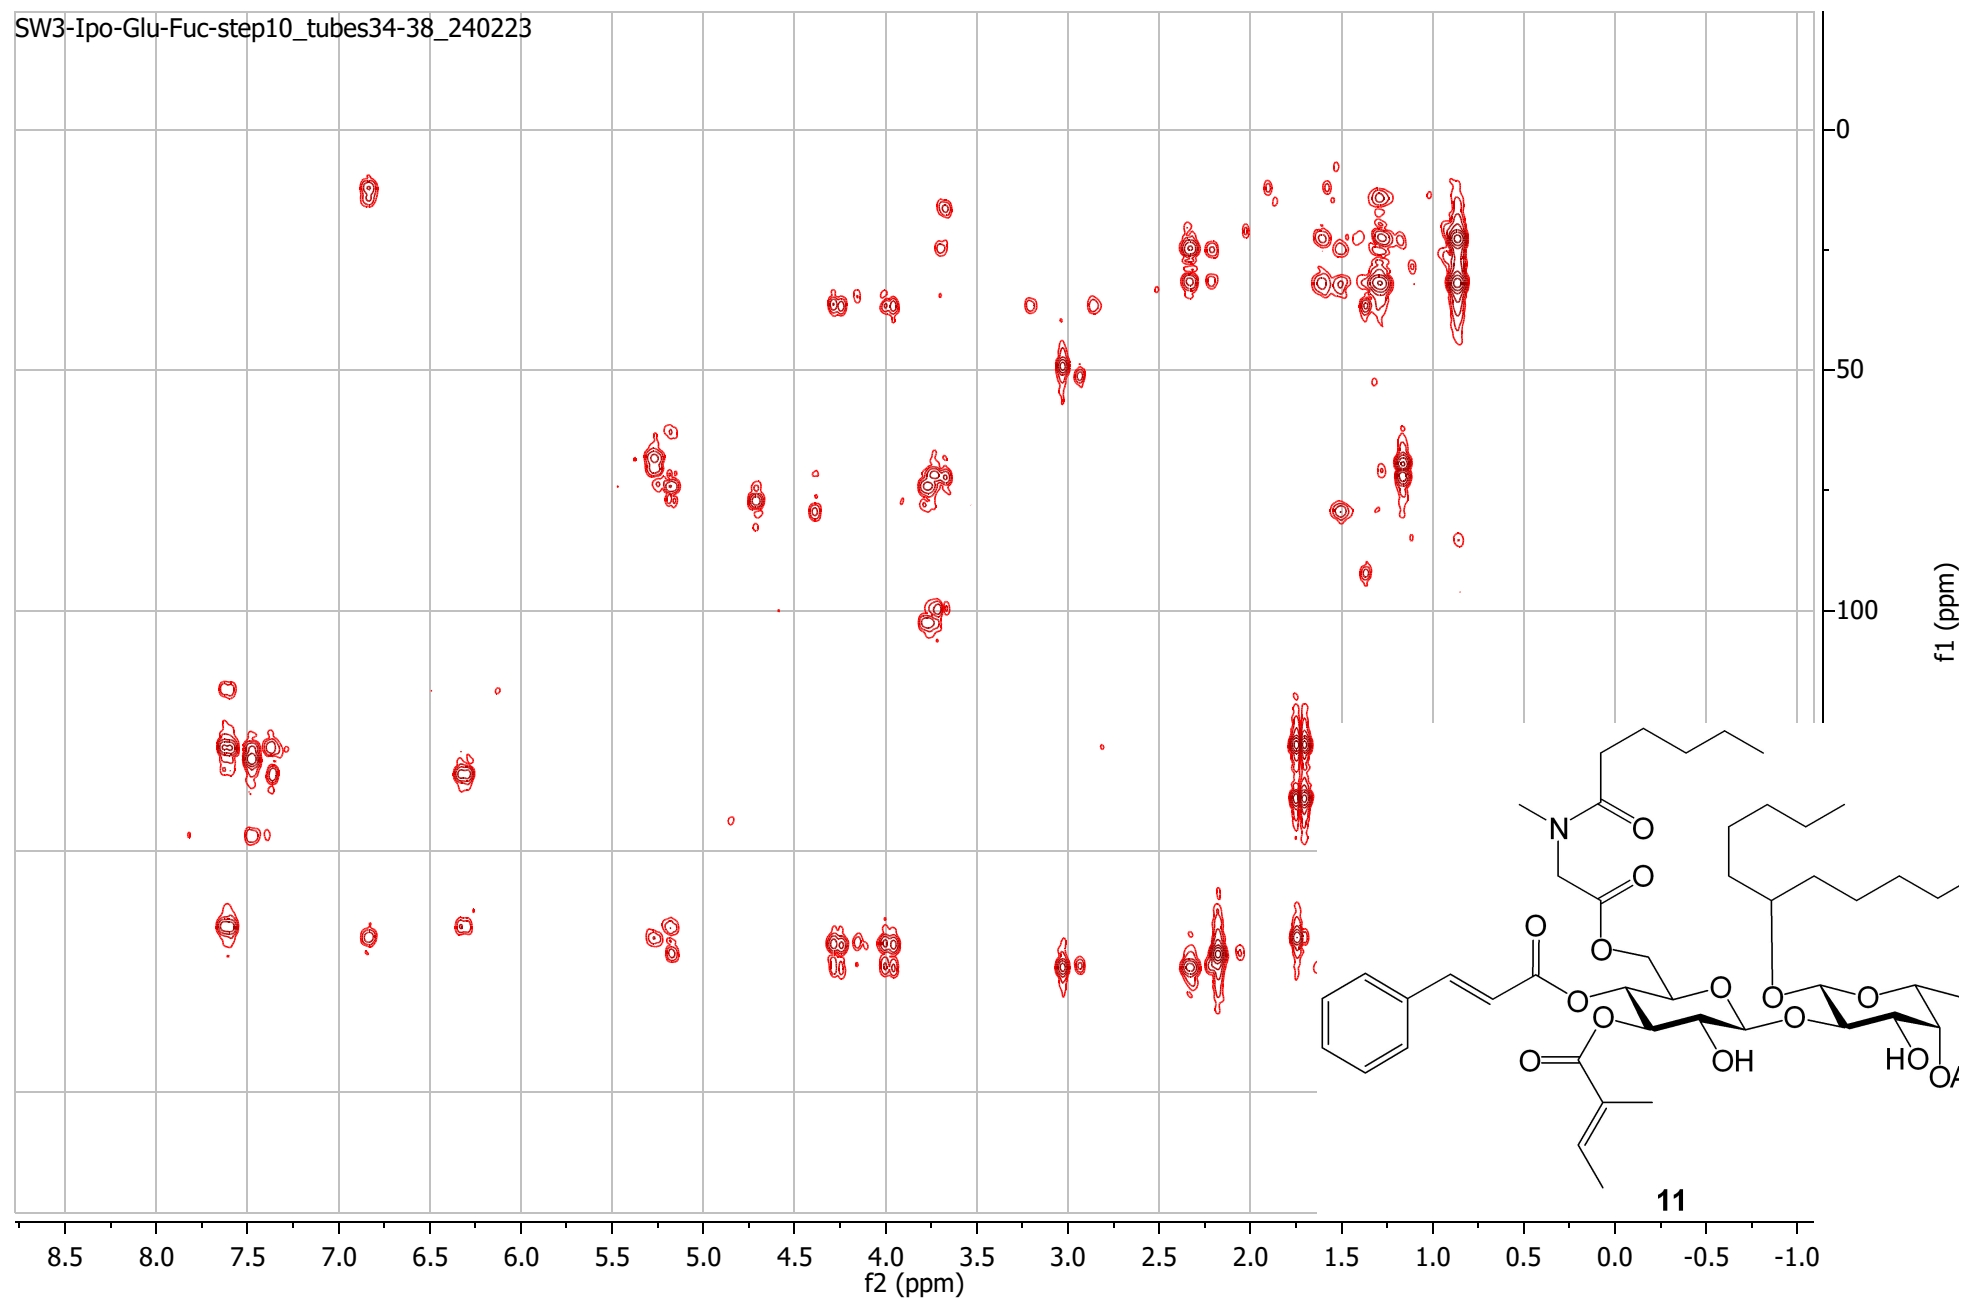

Supplement: Supplementary file 2 [file supplementary]
